# Supplementary material
Source: Royal Society of Chemistry journal article supplement (doi:10.1039/d6cc02524b)
Supplement: d6cc02524b1.pdf [file d6cc02524b1.pdf]

# Supporting Information

## Photocatalyst-free EDA complex-enabled radical difluoroalkylation/cyclization for access to difluoroalkylated polycyclic coumarin derivatives

Bei Liu,<sup>a</sup> Xiaomei Xiao,<sup>a,\*</sup> Lili Wang,<sup>a</sup> Shilong Zhang,<sup>a</sup> Meng Yan,<sup>a,\*</sup> Yuntao Xia,<sup>a</sup> Jinwei Yuan,<sup>a,\*</sup>

<sup>a</sup> School of Chemistry and Chemical Engineering, Henan University of Technology, Zhengzhou  
450001, China

**\*Corresponding authors:**

**E-mail:** [yuanjinweigs@126.com](mailto:yuanjinweigs@126.com) (Jinwei Yuan)

---

### Contents

|                                                                                                                                                                         |     |
|-------------------------------------------------------------------------------------------------------------------------------------------------------------------------|-----|
| 1 Experimental section .....                                                                                                                                            | S2  |
| 1.1 General information.....                                                                                                                                            | S2  |
| 1.2 Optimization of reaction conditions .....                                                                                                                           | S2  |
| 1.3 Synthesis of 2,2-difluoroalkylated pyrano[2,3,4-ij]isoquinoline derivatives (3).....                                                                                | S4  |
| 1.4 Synthesis of 2,2-difluoroalkylated pyrano[2,3,4-ij]isoquinoline derivatives (4).....                                                                                | S10 |
| 1.5 Synthesis of 2,2-difluoroalkylated pyrano[2,3,4-ij]isoquinoline derivatives (6).....                                                                                | S21 |
| 1.6 Synthesis of 3-(4,6-Dimethyl-2,5-dioxo-2,4,5,6-tetrahydropyrano[2,3,4-ij]isoquinolin-6-yl)-2,2-difluoro- <i>N</i> -(3-fluoro-4-morpholinophenyl)propanamide (8).... | S23 |
| 2 Gram scale experiment and natural sunlight experiment .....                                                                                                           | S24 |
| 2.1 Gram scale experiment .....                                                                                                                                         | S24 |
| 2.2 Natural sunlight experiment .....                                                                                                                                   | S25 |
| 3 Mechanistic study .....                                                                                                                                               | S25 |
| 3.1 UV-vis spectroscopic measurement.....                                                                                                                               | S25 |
| 3.2 Light on/off experiment.....                                                                                                                                        | S27 |
| 3.3 HR MS spectra of the adducts.....                                                                                                                                   | S28 |
| 3.4 Stern-Volmer quenching experiments .....                                                                                                                            | S28 |
| 4 Copies of spectra of desired products .....                                                                                                                           | S30 |

## 1 Experimental section

### 1.1 General information

All chemicals were commercially available and used as received without further. Column chromatography was performed using 300-400 mesh silica. Nuclear magnetic resonance spectra were recorded on Bruker Avance 500 MHz spectrometer.  $^1\text{H}$  NMR spectra are recorded in parts per million from tetramethylsilane.  $^{13}\text{C}$  NMR spectra were recorded in parts per million from tetramethylsilane.  $^{19}\text{F}$  NMR spectra were recorded in parts per million with fluorobenzene as external standard. High resolution mass spectra (HR MS) were performed using an Agilent 6546 LC/Q-TOF mass spectrometer. IR spectra were recorded on WQF-510 Fourier transform infrared spectrophotometer. Melting points were measured on an XT4A microscopic apparatus uncorrected. The photochemical reactions were conducted on RLH-18 8-position Photo Reaction System under a blue LED (10 W, 455 nm and 430 nm).

### 1.2 Optimization of reaction conditions

**Table S1.** Optimization of reaction conditions<sup>a</sup>

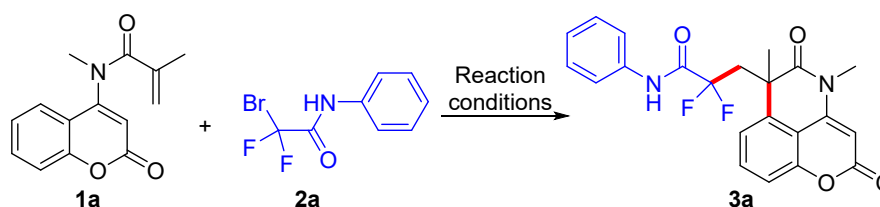

| Entry          | Oxidant (equiv.)                            | Base (equiv.) | Solvent | Yield (%) <sup>b</sup> |
|----------------|---------------------------------------------|---------------|---------|------------------------|
| 1              | $\text{K}_2\text{S}_2\text{O}_8$ (1.5)      | TMEDA (1.5)   | MeCN    | 70                     |
| 2 <sup>c</sup> | $\text{K}_2\text{S}_2\text{O}_8$ (1.5)      | TMEDA (1.5)   | MeCN    | 60                     |
| 3 <sup>d</sup> | $\text{K}_2\text{S}_2\text{O}_8$ (1.5)      | TMEDA (1.5)   | MeCN    | 75                     |
| 4 <sup>e</sup> | $\text{K}_2\text{S}_2\text{O}_8$ (1.5)      | TMEDA (1.5)   | MeCN    | 75                     |
| 5              | $(\text{NH}_4)_2\text{S}_2\text{O}_8$ (1.5) | TMEDA (1.5)   | MeCN    | 70                     |
| 6              | Selectfluor (1.5)                           | TMEDA (1.5)   | MeCN    | 50                     |
| 7              | PIFA (1.5)                                  | TMEDA (1.5)   | MeCN    | 30                     |
| 8              | PIDA (1.5)                                  | TMEDA (1.5)   | MeCN    | 30                     |

|                 |                                                    |                                       |                                  |    |
|-----------------|----------------------------------------------------|---------------------------------------|----------------------------------|----|
| 9               | K <sub>2</sub> S <sub>2</sub> O <sub>8</sub> (1.0) | TMEDA (1.5)                           | MeCN                             | 70 |
| 10              | K <sub>2</sub> S <sub>2</sub> O <sub>8</sub> (2.0) | TMEDA (1.5)                           | MeCN                             | 80 |
| 11              | K <sub>2</sub> S <sub>2</sub> O <sub>8</sub> (2.5) | TMEDA (1.5)                           | MeCN                             | 80 |
| 12              | K <sub>2</sub> S <sub>2</sub> O <sub>8</sub> (2.0) | Et <sub>3</sub> N (1.5)               | MeCN                             | 10 |
| 13              | K <sub>2</sub> S <sub>2</sub> O <sub>8</sub> (2.0) | DBU (1.5)                             | MeCN                             | 0  |
| 14              | K <sub>2</sub> S <sub>2</sub> O <sub>8</sub> (2.0) | DIPEA(1.5)                            | MeCN                             | 10 |
| 15              | K <sub>2</sub> S <sub>2</sub> O <sub>8</sub> (2.0) | NHCO <sub>3</sub> (1.5)               | MeCN                             | 0  |
| 16              | K <sub>2</sub> S <sub>2</sub> O <sub>8</sub> (2.0) | K <sub>3</sub> PO <sub>4</sub> (1.5)  | MeCN                             | 0  |
| 17              | K <sub>2</sub> S <sub>2</sub> O <sub>8</sub> (2.0) | K <sub>2</sub> HPO <sub>4</sub> (1.5) | MeCN                             | 0  |
| 18              | K <sub>2</sub> S <sub>2</sub> O <sub>8</sub> (2.0) | TMEDA (1.0)                           | MeCN                             | 60 |
| 19              | K <sub>2</sub> S <sub>2</sub> O <sub>8</sub> (2.0) | TMEDA (2.0)                           | MeCN                             | 85 |
| 20              | K <sub>2</sub> S <sub>2</sub> O <sub>8</sub> (2.0) | TMEDA (2.5)                           | MeCN                             | 80 |
| 21              | K <sub>2</sub> S <sub>2</sub> O <sub>8</sub> (2.0) | TMEDA (2.0)                           | DMF                              | 80 |
| 22              | K <sub>2</sub> S <sub>2</sub> O <sub>8</sub> (2.0) | TMEDA (2.0)                           | DMSO                             | 80 |
| 23              | K <sub>2</sub> S <sub>2</sub> O <sub>8</sub> (2.0) | TMEDA (2.0)                           | THF                              | 0  |
| 24              | K <sub>2</sub> S <sub>2</sub> O <sub>8</sub> (2.0) | TMEDA (2.0)                           | 2-MeTHF                          | 0  |
| 25              | K <sub>2</sub> S <sub>2</sub> O <sub>8</sub> (2.0) | TMEDA (2.0)                           | H <sub>2</sub> O                 | 0  |
| 26              | K <sub>2</sub> S <sub>2</sub> O <sub>8</sub> (2.0) | TMEDA (2.0)                           | MeCN-H <sub>2</sub> O (1:1, v/v) | 80 |
| 27              | K <sub>2</sub> S <sub>2</sub> O <sub>8</sub> (2.0) | TMEDA (2.0)                           | MeCN-H <sub>2</sub> O (2:1, v/v) | 90 |
| 28 <sup>f</sup> | K <sub>2</sub> S <sub>2</sub> O <sub>8</sub> (2.0) | TMEDA (2.0)                           | MeCN-H <sub>2</sub> O (2:1, v/v) | 80 |
| 29 <sup>g</sup> | K <sub>2</sub> S <sub>2</sub> O <sub>8</sub> (2.0) | TMEDA (2.0)                           | MeCN-H <sub>2</sub> O (2:1, v/v) | 90 |
| 30              | -                                                  | TMEDA (2.0)                           | MeCN-H <sub>2</sub> O (2:1, v/v) | 0  |
| 31              | K <sub>2</sub> S <sub>2</sub> O <sub>8</sub> (2.0) | -                                     | MeCN-H <sub>2</sub> O (2:1, v/v) | 0  |
| 32 <sup>h</sup> | K <sub>2</sub> S <sub>2</sub> O <sub>8</sub> (2.0) | TMEDA (2.0)                           | MeCN-H <sub>2</sub> O (2:1, v/v) | 0  |
| 33              | K <sub>2</sub> S <sub>2</sub> O <sub>8</sub> (2.0) | TMEDA (2.0)                           | MeCN-H <sub>2</sub> O (2:1, v/v) | 20 |

<sup>a</sup> Reaction conditions: *N*-methyl-*N*-(2-oxo-2*H*-chromen-4-yl)methacrylamide **1a** (0.2 mmol, 48.6 mg), BrCF<sub>2</sub>CONHPh **2a** (0.3 mmol, 74.7 mg), oxidant, base, and solvent (2 mL), 10 W blue LEDs (430 nm) for 6 h at room temperature under N<sub>2</sub> atmosphere. <sup>b</sup> Isolated yield. <sup>c</sup> The molar ratio of **1a** and **2a** is 1:1. <sup>d</sup> The molar ratio of **1a** and **2a** is 1:2. <sup>e</sup> The molar ratio of **1a** and **2a** is 1:2.5. <sup>f</sup> 5 h. <sup>g</sup> 7 h. <sup>h</sup> Without blue LEDs irradiation, strictly avoid

light under full dark conditions. <sup>i</sup> In air atmosphere.

### 1.3 General procedure for the synthesis of 2,2-difluoroalkylated pyrano[2,3,4-*ij*]isoquinoline derivatives (3)

A Schlenk-tube equipped with a magnetic stir bar was charged with *N*-(2-oxo-2*H*-chromen-4-yl)methacrylamides **1** (0.2 mmol), BrCF<sub>2</sub>CONHPh **2a** (0.4 mmol, 99.6 mg), K<sub>2</sub>S<sub>2</sub>O<sub>8</sub> (0.4 mmol, 108 mg), TMEDA (0.4 mmol, 46.4 mg) and MeCN-H<sub>2</sub>O (2 mL, v/v, 2:1). The tube was stirred under the irradiation of 10 W blue LEDs (430 nm) at room temperature under N<sub>2</sub> atmosphere. After 6 hours, the mixture was transferred into a 100 mL separating funnel which contained 20 mL saturated sodium chloride solution. The mixture was extracted with ethyl acetate (10 mL × 2). The combined organic phase was dried over anhydrous Na<sub>2</sub>SO<sub>4</sub> and concentrated under vacuum. The residue was purified by flash column chromatography using a mixture of ethyl acetate /petroleum ether as eluent to give the desired products **3**.

#### 3-(4,6-Dimethyl-2,5-dioxo-2,4,5,6-tetrahydropyrano[2,3,4-*ij*]isoquinolin-6-yl)-2,2-difluoro-*N*-phenylpropanamide (3a)

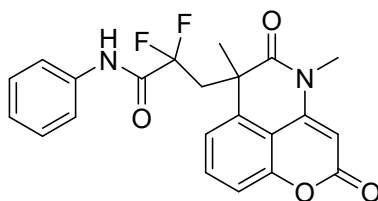

White solid (74.2 mg, 90%), m.p. 220.3-221.3 °C, R<sub>f</sub> = 0.26 (EA/DCM/PE = 1:3:4). IR (KBr)  $\nu$ (cm<sup>-1</sup>): 3279, 1680, 1613, 1542, 1436, 1347, 1281, 1182, 1075. <sup>1</sup>H NMR (500 MHz, DMSO-*d*<sub>6</sub>)  $\delta$ : 10.1 (s, 1H), 7.58-7.55 (m, 2H), 7.44 (d, *J*<sub>H-H</sub> = 7.9 Hz, 2H), 7.28 (t, *J*<sub>H-H</sub> = 7.7 Hz, 2H), 7.18 (dd, *J*<sub>H-H</sub> = 6.9 Hz, *J*<sub>H-H</sub> = 2.1 Hz, 1H), 7.11 (t, *J*<sub>H-H</sub> = 7.3 Hz, 1H), 5.98 (s, 1H), 3.44 (s, 3H), 3.38-3.11 (m, 2H), 1.64 (s, 3H). <sup>13</sup>C NMR (126 MHz, DMSO-*d*<sub>6</sub>)  $\delta$ : 172.2 (C=O), 161.5 (t, *J*<sub>F-C</sub> = 29.0 Hz, C=O), 161.3 (C=O), 151.8, 148.9, 137.5, 137.3, 132.8, 128.9, 125.2, 123.0, 121.0, 116.9 (dd, *J*<sub>F-C</sub> = 252.0 Hz, *J*<sub>F-C</sub> = 252.0 Hz), 114.9, 108.8, 92.9, 44.9 (t, *J*<sub>F-C</sub> = 22.1 Hz), 43.3 (d, *J*<sub>F-C</sub> = 3.2 Hz), 31.8, 29.9. <sup>19</sup>F NMR (471 MHz, DMSO-*d*<sub>6</sub>)  $\delta$ : -97.5 (d, *J*<sub>F-C</sub> = 255.5 Hz, 1F), -102.7 (d, *J*<sub>F-C</sub> = 255.5 Hz, 1F). HR MS (ESI) *m/z*: calcd for C<sub>22</sub>H<sub>19</sub>F<sub>2</sub>N<sub>2</sub>O<sub>4</sub> [M + H]<sup>+</sup> 413.1307, found 413.1305.

#### 2,2-Difluoro-*N*-phenyl-3-(4,6,7-trimethyl-2,5-dioxo-2,4,5,6-tetrahydropyrano[2,3,4-*ij*]isoquinolin-6-yl)propanamide (3b)

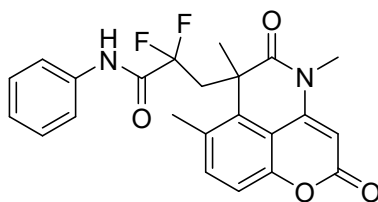

White solid (55.4 mg, 65%), m.p. 182.4-183.4 °C,  $R_f = 0.321$  (EA/PE = 1:2). IR (KBr)  $\nu(\text{cm}^{-1})$ : 3284, 2924, 1677, 1614, 1565, 1445, 1350, 1270, 1160.  $^1\text{H}$  NMR (500 MHz,  $\text{DMSO-}d_6$ )  $\delta$ : 10.18 (s, 1H), 7.42 (d,  $J_{\text{H-H}} = 7.9$  Hz, 2H), 7.37 (d,  $J_{\text{H-H}} = 8.6$  Hz, 1H), 7.28 (t,  $J_{\text{H-H}} = 7.7$  Hz, 2H), 7.13-7.09 (m, 2H), 5.97 (s, 1H), 3.54-3.48 (m, 1H), 3.27-3.20 (m, 1H), 2.50 (s, 6H), 1.74 (s, 3H).  $^{13}\text{C}$  NMR (126 MHz,  $\text{DMSO-}d_6$ )  $\delta$ : 173.3 (C=O), 161.2 (t,  $J_{\text{F-C}} = 29.1$  Hz, C=O), 161.1 (C=O), 151.0, 149.1, 137.6, 137.3, 133.7, 132.6, 129.0, 125.3, 121.0, 109.5, 92.8, 44.4 (d,  $J_{\text{F-C}} = 5.4$  Hz), 41.5 (t,  $J_{\text{F-C}} = 22.4$  Hz), 30.4, 27.7, 22.2.  $^{19}\text{F}$  NMR (471 MHz,  $\text{DMSO-}d_6$ )  $\delta$ : -97.7 (d,  $J_{\text{F-C}} = 256.4$  Hz, 1F), -105.2 (d,  $J_{\text{F-C}} = 256.4$  Hz, 1F). HR MS (ESI)  $m/z$ : calcd for  $\text{C}_{23}\text{H}_{21}\text{F}_2\text{N}_2\text{O}_4$   $[\text{M} + \text{H}]^+$  427.1464, found 427.1455.

**2,2-Difluoro-N-phenyl-3-(4,6,8-trimethyl-2,5-dioxo-2,4,5,6-tetrahydropyrano[2,3,4-*ij*]isoquinolin-6-yl)propanamide (3c)**

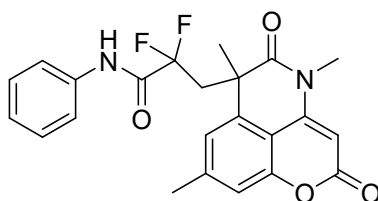

White solid (61.3 mg, 72%), m.p. 185.0-186.0 °C,  $R_f = 0.323$  (EA/PE = 1:2). IR (KBr)  $\nu(\text{cm}^{-1})$ : 3282, 2917, 2850, 1686, 1615, 1548, 1445, 1425, 1347, 1296, 1142, 1082.  $^1\text{H}$  NMR (500 MHz,  $\text{DMSO-}d_6$ )  $\delta$ : 10.12 (s, 1H), 7.44 (d,  $J_{\text{H-H}} = 7.9$  Hz, 2H), 7.34 (s, 1H), 7.28 (t,  $J_{\text{H-H}} = 7.6$  Hz, 2H), 7.11 (t,  $J_{\text{H-H}} = 7.4$  Hz, 1H), 6.94 (s, 1H), 5.93 (s, 1H), 3.33 (s, 3H), 3.28-3.09 (m, 2H), 2.20 (s, 3H), 1.61 (s, 3H).  $^{13}\text{C}$  NMR (126 MHz,  $\text{DMSO-}d_6$ )  $\delta$ : 171.3 (C=O), 160.5 (t,  $J_{\text{F-C}} = 28.3$  Hz, C=O), 160.4 (C=O), 152.8, 147.9, 142.5, 136.3, 135.7, 127.8, 124.1, 122.7, 119.7, 114.4 (d,  $J_{\text{F-C}} = 256.0$  Hz), 105.4, 90.9, 43.8 (t,  $J_{\text{F-C}} = 21.8$  Hz), 42.2 (d,  $J_{\text{F-C}} = 5.1$  Hz), 30.7, 28.8, 20.5.  $^{19}\text{F}$  NMR (471 MHz,  $\text{DMSO-}d_6$ )  $\delta$ : -95.8 (d,  $J_{\text{F-C}} = 255.9$  Hz, 1F), -104.4 (d,  $J_{\text{F-C}} = 255.9$  Hz, 1F). HR MS (ESI)  $m/z$ : calcd for  $\text{C}_{23}\text{H}_{20}\text{F}_2\text{N}_2\text{O}_4\text{Na}$   $[\text{M} + \text{Na}]^+$  449.1283, found 449.1261.

**2,2-Difluoro-3-(8-methoxy-4,6-dimethyl-2,5-dioxo-2,4,5,6-tetrahydropyrano[2,3,4-*ij*]isoquinolin-6-yl)-N-phenylpropanamide (3d)**

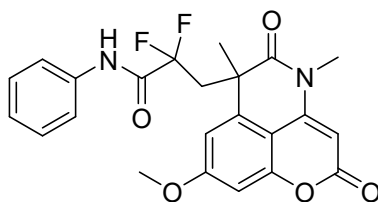

White solid (62.8 mg, 71%), m.p. 177.1-178.1 °C,  $R_f = 0.33$  (EA/PE = 1:2). IR (KBr)  $\nu(\text{cm}^{-1})$ : 3275, 2918, 1685, 1606, 1548, 1424, 1347, 1140.  $^1\text{H}$  NMR (500 MHz,  $\text{DMSO-}d_6$ )  $\delta$ : 10.14 (s, 1H), 7.44 (d,  $J_{\text{H-H}} = 8.2$  Hz, 2H), 7.28 (t,  $J_{\text{H-H}} = 7.8$  Hz, 2H), 7.11 (t,  $J_{\text{H-H}} = 6.4$  Hz, 2H), 6.74 (d,  $J_{\text{H-H}} = 1.6$  Hz, 1H), 5.84 (s, 1H), 3.70 (s, 3H), 3.32-3.26 (m, 4H), 3.16-3.07 (m, 1H), 1.62 (s, 3H).  $^{13}\text{C}$  NMR (126 MHz,  $\text{DMSO-}d_6$ )  $\delta$ : 172.3 (C=O), 163.0 (C=O), 161.6 (t,  $J_{\text{F-C}} = 28.9$  Hz, C=O), 153.8, 149.2, 138.5, 137.3, 128.9, 125.2, 120.9, 110.7, 102.2, 100.1, 90.3, 56.2, 44.7 (t,  $J_{\text{F-C}} = 22.2$  Hz), 43.5 (d,  $J_{\text{F-C}} = 3.6$  Hz), 31.8, 29.8.  $^{19}\text{F}$  NMR (471 MHz,  $\text{DMSO-}d_6$ )  $\delta$ : -95.9 (d,  $J_{\text{F-C}} = 255.5$  Hz, 1F), -104.5 (d,  $J_{\text{F-C}} = 255.5$  Hz, 1F). HR MS (ESI)  $m/z$ : calcd for  $\text{C}_{23}\text{H}_{20}\text{F}_2\text{N}_2\text{O}_5\text{Na}$   $[\text{M} + \text{Na}]^+$  465.1232, found 465.1240.

**2,2-Difluoro-3-(7-fluoro-4,6-dimethyl-2,5-dioxo-2,4,5,6-tetrahydropyrano[2,3,4-*ij*]isoquinolin-6-yl)-*N*-phenylpropanamide (3e)**

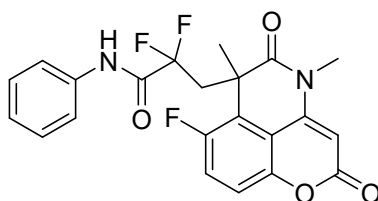

White solid (58.5 mg, 68%), m.p. 193.5-194.5 °C,  $R_f = 0.314$  (EA/PE = 1:2). IR (KBr)  $\nu(\text{cm}^{-1})$ : 3293, 2917, 2851, 1680, 1610, 1556, 1494, 1449, 1354, 1233, 1171.  $^1\text{H}$  NMR (500 MHz,  $\text{DMSO-}d_6$ )  $\delta$ : 10.32 (s, 1H), 7.50 (t,  $J_{\text{H-H}} = 8.5$  Hz, 1H), 7.45 (d,  $J_{\text{H-H}} = 8.0$  Hz, 2H), 7.34-7.33 (m, 1H), 7.32-7.27 (m, 2H), 7.12 (t,  $J_{\text{H-H}} = 7.3$  Hz, 1H), 6.07 (s, 1H), 3.27 (s, 3H), 3.24-3.18 (m, 2H), 1.70 (s, 3H).  $^{13}\text{C}$  NMR (126 MHz,  $\text{DMSO-}d_6$ )  $\delta$ : 171.5 (C=O), 161.2 (t,  $J_{\text{F-C}} = 28.8$  Hz, C=O), 161.0 (C=O), 156.9, 155.0, 148.4, 137.2, 129.0, 125.3, 122.4 (d,  $J_{\text{F-C}} = 12.5$  Hz), 121.0, 120.9 (d,  $J_{\text{F-C}} = 25.9$  Hz), 117.8 (dd,  $J_{\text{F-C}} = 250.0$  Hz,  $J_{\text{F-C}} = 250.0$  Hz), 110.0 (d,  $J_{\text{F-C}} = 5.6$  Hz), 93.8, 42.5, 41.5, 30.3, 28.2 (d,  $J_{\text{F-C}} = 3.6$  Hz).  $^{19}\text{F}$  NMR (471 MHz,  $\text{DMSO-}d_6$ )  $\delta$ : -99.1 (d,  $J_{\text{F-C}} = 255.6$  Hz, 1F), -103.4 (d,  $J_{\text{F-C}} = 255.6$  Hz, 1F), -116.0 (s, 1F). HR MS (ESI)  $m/z$ : calcd for  $\text{C}_{22}\text{H}_{18}\text{F}_3\text{N}_2\text{O}_4$   $[\text{M} + \text{H}]^+$  431.1213, found 431.1199.

**3-(7-Chloro-4,6-dimethyl-2,5-dioxo-2,4,5,6-tetrahydropyrano[2,3,4-*ij*]isoquinolin-6-yl)-2,2-difluoro-*N*-phenylpropanamide (3f)**

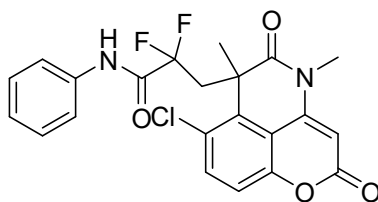

White solid (55.3 mg, 62%), m.p. 166.2-167.2 °C,  $R_f = 0.31$  (EA/PE = 1:2). IR (KBr)  $\nu(\text{cm}^{-1})$ : 3297, 2953, 2915, 1729, 1693, 1612, 1556, 1488, 1459, 1376, 1357, 1265, 1180.  $^1\text{H}$  NMR (500 MHz,  $\text{CDCl}_3$ )  $\delta$ : 7.85 (s, 1H), 7.55 (d,  $J_{\text{H-H}} = 8.9$  Hz, 1H), 7.42 (d,  $J_{\text{H-H}} = 7.9$  Hz, 2H), 7.32 (t,  $J_{\text{H-H}} = 7.7$  Hz, 2H), 7.20-7.15 (m, 2H), 5.82 (s, 1H), 4.05-3.95 (m, 1H), 3.41 (s, 3H), 3.37-3.30 (m, 1H), 1.92 (s, 3H).  $^{13}\text{C}$  NMR (126 MHz,  $\text{CDCl}_3$ )  $\delta$ : 172.2 (C=O), 160.8 (C=O), 160.7 (t,  $J_{\text{F-C}} = 27.6$  Hz, C=O), 151.4, 148.0, 135.8, 135.7, 132.7, 129.2, 128.3, 125.7, 120.0, 118.7, 116.7 (t,  $J_{\text{F-C}} = 257.0$  Hz), 110.7, 93.3, 44.3, 40.1 (t,  $J_{\text{F-C}} = 21.4$  Hz), 30.2, 26.7.  $^{19}\text{F}$  NMR (471 MHz,  $\text{CDCl}_3$ )  $\delta$ : -99.3 (d,  $J_{\text{F-C}} = 256.2$  Hz, 1F), -103.4 (d,  $J_{\text{F-C}} = 256.2$  Hz, 1F). HR MS (ESI)  $m/z$ : calcd for  $\text{C}_{22}\text{H}_{18}\text{ClF}_2\text{N}_2\text{O}_4$   $[\text{M} + \text{H}]^+$  447.0918, found 447.0912.

**3-(4-Ethyl-6-methyl-2,5-dioxo-2,4,5,6-tetrahydropyrano[2,3,4-ij]isoquinolin-6-yl)-2,2-difluoro-N-phenylpropanamide (3g)**

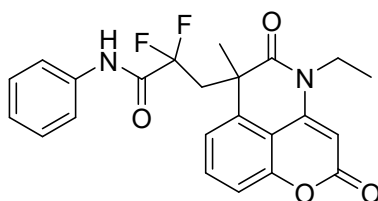

White solid (72.4 mg, 85%), m.p. 186.8-187.8 °C,  $R_f = 0.332$  (EA/PE = 1:2). IR (KBr)  $\nu(\text{cm}^{-1})$ : 3280, 1685, 1607, 1537, 1496, 1448, 1384, 1251, 1086.  $^1\text{H}$  NMR (500 MHz,  $\text{DMSO}-d_6$ )  $\delta$ : 10.20 (s, 1H), 7.60-7.56 (m, 2H), 7.46 (d,  $J_{\text{H-H}} = 7.9$  Hz, 2H), 7.29 (t,  $J_{\text{H-H}} = 7.6$  Hz, 2H), 7.20 (dd,  $J_{\text{H-H}} = 7.2$  Hz,  $J_{\text{H-H}} = 1.6$  Hz, 1H), 7.12 (t,  $J_{\text{H-H}} = 7.4$  Hz, 1H), 6.07 (s, 1H), 4.10-4.02 (m, 1H), 3.97-3.90 (m, 1H), 3.32-3.14 (m, 2H), 1.65 (s, 3H), 1.15 (t,  $J_{\text{H-H}} = 6.9$  Hz, 3H).  $^{13}\text{C}$  NMR (126 MHz,  $\text{DMSO}-d_6$ )  $\delta$ : 170.8 (C=O), 160.5 (t,  $J_{\text{F-C}} = 28.8$  Hz, C=O), 160.4 (C=O), 150.9, 146.6, 136.6, 136.2, 131.7, 127.9, 124.2, 121.9, 120.0, 115.9 (t,  $J_{\text{F-C}} = 257.0$  Hz), 114.1, 107.8, 91.4, 43.7 (t,  $J_{\text{F-C}} = 21.9$  Hz), 42.1 (d,  $J_{\text{F-C}} = 3.4$  Hz), 36.6, 30.8, 10.5.  $^{19}\text{F}$  NMR (471 MHz,  $\text{DMSO}-d_6$ )  $\delta$ : -97.1 (d,  $J_{\text{F-C}} = 256.5$  Hz, 1F), -102.8 (d,  $J_{\text{F-C}} = 256.5$  Hz, 1F). HR MS (ESI)  $m/z$ : calcd for  $\text{C}_{23}\text{H}_{21}\text{F}_2\text{N}_2\text{O}_4$   $[\text{M} + \text{H}]^+$  427.1464, found 427.1470.

**2,2-Difluoro-3-(6-methyl-2,5-dioxo-4-propyl-2,4,5,6-tetrahydropyrano[2,3,4-ij]isoquinolin-6-yl)-N-phenylpropanamide (3h)**

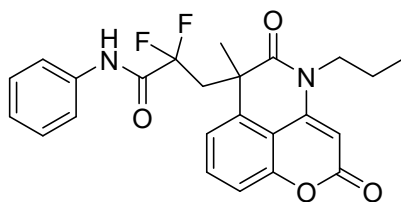

White solid (73.9 mg, 84%), m.p. 176.4-177.4 °C,  $R_f = 0.316$  (EA/PE = 1:2). IR (KBr)  $\nu(\text{cm}^{-1})$ : 3312, 1720, 1687, 1616, 1603, 1548, 1448, 1358, 1282, 1239, 1083.  $^1\text{H}$  NMR (500 MHz, DMSO- $d_6$ )  $\delta$ : 10.21 (s, 1H), 7.60-7.56 (m, 2H), 7.47 (d,  $J_{\text{H-H}} = 7.9$  Hz, 2H), 7.30 (t,  $J_{\text{H-H}} = 7.6$  Hz, 2H), 7.21 (dd,  $J_{\text{H-H}} = 6.9$  Hz,  $J_{\text{H-H}} = 2.0$  Hz, 1H), 7.12 (t,  $J_{\text{H-H}} = 7.4$  Hz, 1H), 6.07 (s, 1H), 3.95-3.88 (m, 2H), 3.33-3.15 (m, 2H), 1.65 (s, 3H), 1.61-1.58 (m, 2H), 0.94 (t,  $J_{\text{H-H}} = 7.4$  Hz, 3H).  $^{13}\text{C}$  NMR (126 MHz, DMSO- $d_6$ )  $\delta$ : 172.2 (C=O), 161.6 (t,  $J_{\text{F-C}} = 28.8$  Hz, C=O), 161.5 (C=O), 152.0, 148.0, 137.6, 137.3, 132.7, 128.9, 125.2, 123.0, 121.1, 117.0 (dd,  $J_{\text{F-C}} = 257.0$  Hz,  $J_{\text{F-C}} = 257.0$  Hz), 115.2, 108.9, 92.7, 44.6 (t,  $J_{\text{F-C}} = 22.2$  Hz), 43.9, 43.3 (d,  $J_{\text{F-C}} = 3.6$  Hz), 32.1, 19.5, 11.4.  $^{19}\text{F}$  NMR (471 MHz, DMSO- $d_6$ )  $\delta$ : -97.1 (d,  $J_{\text{F-C}} = 256.6$  Hz, 1F), -102.8 (d,  $J_{\text{F-C}} = 256.6$  Hz, 1F). HR MS (ESI)  $m/z$ : calcd for  $\text{C}_{24}\text{H}_{23}\text{F}_2\text{N}_2\text{O}_4$  [M + H] $^+$  441.1620, found 441.1613.

**3-(4-Butyl-6-methyl-2,5-dioxo-2,4,5,6-tetrahydropyrano[2,3,4-ij]isoquinolin-6-yl)-2,2-difluoro-N-phenylpropanamide (3i)**

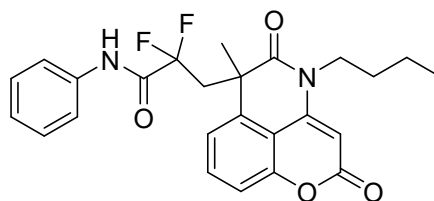

White solid (72.6 mg, 80%), m.p. 155.8-156.8 °C,  $R_f = 0.32$  (EA/PE = 1:3). IR (KBr)  $\nu(\text{cm}^{-1})$ : 3278, 2953, 1682, 1612, 1545, 1500, 1445, 1380, 1281, 1188.  $^1\text{H}$  NMR (500 MHz,  $\text{CDCl}_3$ )  $\delta$ : 10.20 (s, 1H), 7.60-7.55 (m, 2H), 7.46 (d,  $J_{\text{H-H}} = 8.1$  Hz, 2H), 7.29 (t,  $J_{\text{H-H}} = 7.7$  Hz, 2H), 7.21 (dd,  $J_{\text{H-H}} = 7.1$  Hz,  $J_{\text{H-H}} = 1.5$  Hz, 1H), 7.12 (t,  $J_{\text{H-H}} = 7.4$  Hz, 1H), 6.02 (s, 1H), 3.98-3.87 (m, 2H), 3.32-3.14 (m, 2H), 1.64 (s, 3H), 1.58-1.48 (m, 2H), 1.40-1.35 (m, 2H), 0.90 (t,  $J_{\text{H-H}} = 7.3$  Hz, 3H).  $^{13}\text{C}$  NMR (126 MHz,  $\text{CDCl}_3$ )  $\delta$ : 172.2 (C=O), 161.6 (t,  $J_{\text{F-C}} = 31.2$  Hz, C=O), 161.4 (C=O), 152.0, 147.9, 137.6, 137.3, 132.8, 129.0, 125.2, 123.0, 121.1, 117.0 (dd,  $J_{\text{F-C}} = 250.9$  Hz,  $J_{\text{F-C}} = 250.9$  Hz), 115.2, 108.9, 92.6, 44.6 (t,  $J_{\text{F-C}} = 21.2$  Hz), 43.3 (d,  $J_{\text{F-C}} = 3.0$  Hz), 42.2, 32.1, 28.2, 19.8, 14.2.  $^{19}\text{F}$  NMR (471 MHz,  $\text{CDCl}_3$ )  $\delta$ : -97.0 (d,  $J_{\text{F-C}} = 256.5$  Hz, 1F), -102.6 (d,  $J_{\text{F-C}} = 256.5$  Hz, 1F). HR MS (ESI)  $m/z$ : calcd for  $\text{C}_{25}\text{H}_{25}\text{F}_2\text{N}_2\text{O}_4$  [M + H] $^+$  455.1777, found 455.1770.

**3-(4-Cyclopropyl-6-methyl-2,5-dioxo-2,4,5,6-tetrahydropyrano[2,3,4-ij]isoquinolin-6-yl)-2,2-**

**difluoro-*N*-phenylpropanamide (3j)**

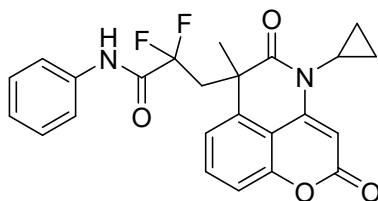

White solid (43.8 mg, 50%), m.p. 204.4-205.4 °C,  $R_f = 0.27$  (EA/PE = 1:2). IR (KBr)  $\nu(\text{cm}^{-1})$ : 3334, 2921, 1683, 1618, 1546, 1489, 1449, 1413, 1335, 1278, 1170.  $^1\text{H NMR}$  (500 MHz,  $\text{DMSO-}d_6$ )  $\delta$ : 10.17 (s, 1H), 7.55-7.52 (m, 2H), 7.43 (d,  $J_{\text{H-H}} = 7.8$  Hz, 2H), 7.28 (t,  $J_{\text{H-H}} = 7.7$  Hz, 2H), 7.17 (d,  $J_{\text{H-H}} = 7.0$  Hz, 1H), 7.12 (d,  $J_{\text{H-H}} = 7.4$  Hz, 1H), 6.18 (s, 1H), 3.26-3.04 (m, 2H), 2.73 (bs, 1H), 1.59 (s, 3H), 1.20-1.16 (m, 2H), 0.79-0.77 (m, 1H), 0.68-0.66 (m, 1H).  $^{13}\text{C NMR}$  (126 MHz,  $\text{DMSO-}d_6$ )  $\delta$ : 173.1 (C=O), 161.4 (t,  $J_{\text{F-C}} = 28.8$  Hz, C=O), 161.3 (C=O), 151.8, 150.0, 137.7, 137.3, 132.7, 129.0, 125.3, 123.0, 121.1, 115.1, 109.2, 93.4, 43.9 (d,  $J_{\text{F-C}} = 3.6$  Hz), 31.5, 26.3, 10.4, 9.8.  $^{19}\text{F NMR}$  (471 MHz,  $\text{DMSO-}d_6$ )  $\delta$ : -96.8 (d,  $J_{\text{F-C}} = 256.6$  Hz, 1F), -102.6 (d,  $J_{\text{F-C}} = 256.6$  Hz, 1F). HR MS (ESI)  $m/z$ : calcd for  $\text{C}_{24}\text{H}_{20}\text{F}_2\text{N}_2\text{O}_4\text{Na}$  [M + Na] $^+$  461.1283, found 461.1249.

**3-(4-Cyclopentyl-6-methyl-2,5-dioxo-2,4,5,6-tetrahydropyrano[2,3,4-*ij*]isoquinolin-6-yl)-2,2-**

**difluoro-*N*-phenylpropanamide (3k)**

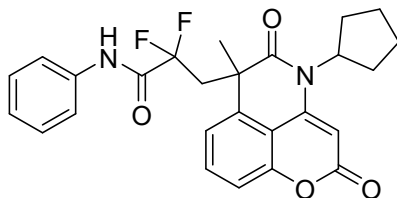

White solid (68.0 mg, 73%), m.p. 162.1-163.1 °C,  $R_f = 0.32$  (EA/PE = 1:2). IR (KBr)  $\nu(\text{cm}^{-1})$ : 3295, 2915, 1682, 1616, 1560, 1545, 1497, 1446, 1400, 1281, 1190.  $^1\text{H NMR}$  (500 MHz,  $\text{DMSO-}d_6$ )  $\delta$ : 10.21 (s, 1H), 7.56 (bs, 2H), 7.49 (d,  $J_{\text{H-H}} = 6.8$  Hz, 2H), 7.32 (t,  $J_{\text{H-H}} = 7.7$  Hz, 2H), 7.21-7.20 (m, 1H), 7.15-7.13 (m, 1H), 6.26 (s, 1H), 4.86 (s, 1H), 3.29-3.20 (m, 2H), 1.96-1.91 (m, 6H), 1.65 (s, 3H), 1.60 (bs, 2H).  $^{13}\text{C NMR}$  (126 MHz,  $\text{DMSO-}d_6$ )  $\delta$ : 172.2 (C=O), 161.7 (C=O), 161.6 (t,  $J_{\text{F-C}} = 28.4$  Hz, C=O), 151.9, 149.4, 137.6, 137.4, 132.6, 128.9, 125.2, 122.9, 121.2, 117.1 (t,  $J_{\text{F-C}} = 256.0$  Hz), 115.2, 93.1, 56.9, 44.2 (t,  $J_{\text{F-C}} = 21.1$  Hz), 44.0 (d,  $J_{\text{F-C}} = 3.6$  Hz), 31.9, 28.5, 28.0, 26.2, 26.0.  $^{19}\text{F NMR}$  (471 MHz,  $\text{DMSO-}d_6$ )  $\delta$ : -96.5 (d,  $J_{\text{F-C}} = 256.9$  Hz, 1F), -103.0 (d,  $J_{\text{F-C}} = 256.9$  Hz, 1F). HR MS (ESI)  $m/z$ : calcd for  $\text{C}_{26}\text{H}_{25}\text{F}_2\text{N}_2\text{O}_4$  [M + H] $^+$  467.1777, found 467.1779.

#### 1.4 General procedure for the synthesis of 2,2-difluoroalkylated pyrano[2,3,4-ij]isoquinoline derivatives (4)

A Schlenk-tube equipped with a magnetic stir bar was charged with *N*-methyl-*N*-(2-oxo-2*H*-chromen-4-yl)methacrylamide **1a** (0.2 mmol, 48.6 mg), BrCF<sub>2</sub>COR<sup>2</sup> (0.4 mmol), K<sub>2</sub>S<sub>2</sub>O<sub>8</sub> (0.4 mmol, 108 mg), TMEDA (0.4 mmol, 46.4 mg) and MeCN-H<sub>2</sub>O (2 mL, v/v, 2:1). The tube was stirred under the irradiation of 10 W blue LEDs (430 nm) at room temperature under N<sub>2</sub> atmosphere. After 6 hours, the mixture was transferred into a 100 mL separating funnel which contained 20 mL saturated sodium chloride solution. The mixture was extracted with ethyl acetate (10 mL × 2). The combined organic phase was dried over anhydrous Na<sub>2</sub>SO<sub>4</sub> and concentrated under vacuum. The residue was purified by flash column chromatography using a mixture of ethyl acetate /petroleum ether as eluent to give the desired products **4**.

#### 3-(4,6-Dimethyl-2,5-dioxo-2,4,5,6-tetrahydropyrano[2,3,4-*ij*]isoquinolin-6-yl)-2,2-difluoro-*N*-(*p*-tolyl)propanamide (4a)

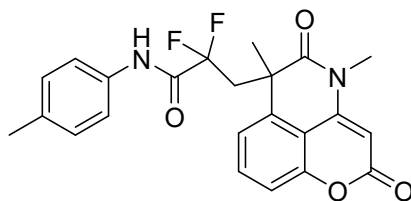

White solid (72.4 mg, 85%), m.p. 205.4-206.4 °C, R<sub>f</sub> = 0.29 (EA/DCM/PE = 1:3:3). IR (KBr)  $\nu$ (cm<sup>-1</sup>): 3340, 1679, 1607, 1526, 1351, 1279, 1179, 1075. <sup>1</sup>H NMR (500 MHz, DMSO-*d*<sub>6</sub>)  $\delta$ : 10.1 (s, 1H), 7.58-7.55 (m, 2H), 7.31 (d, *J*<sub>H-H</sub> = 8.4 Hz, 2H), 7.21-7.19 (m, 1H), 7.08 (d, *J*<sub>H-H</sub> = 8.3 Hz, 2H), 5.98 (s, 1H), 3.33 (s, 3H), 3.27-3.12 (m, 2H), 2.24 (s, 3H), 1.64 (s, 3H). <sup>13</sup>C NMR (126 MHz, DMSO-*d*<sub>6</sub>)  $\delta$ : 172.2 (C=O), 161.3 (t, *J*<sub>F-C</sub> = 32.3 Hz, C=O), 151.8, 148.9, 137.5, 134.8, 134.3, 132.8, 129.3, 123.0, 121.0, 116.9 (t, *J*<sub>F-C</sub> = 257.4 Hz), 114.9, 108.8, 92.9, 44.9 (t, *J*<sub>F-C</sub> = 22.6 Hz), 43.3, 31.8, 29.9, 20.9. <sup>19</sup>F NMR (471 MHz, DMSO-*d*<sub>6</sub>)  $\delta$ : -97.5 (d, *J*<sub>F-C</sub> = 255.3 Hz, 1F), -102.6 (d, *J*<sub>F-C</sub> = 255.3 Hz, 1F). HR MS (ESI) *m/z*: calcd for C<sub>23</sub>H<sub>21</sub>F<sub>2</sub>N<sub>2</sub>O<sub>4</sub> [M + H]<sup>+</sup> 427.1464, found 427.1466.

#### 3-(4,6-Dimethyl-2,5-dioxo-2,4,5,6-tetrahydropyrano[2,3,4-*ij*]isoquinolin-6-yl)-2,2-difluoro-*N*-(*m*-tolyl)propanamide (4b)

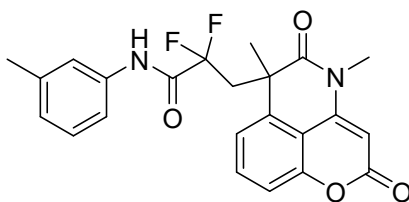

White solid (59.6 mg, 70%), m.p. 205.6-206.6 °C,  $R_f = 0.296$  (EA/PE = 1:2). IR (KBr)  $\nu(\text{cm}^{-1})$ : 3253, 2920, 1682, 1617, 1559, 1500, 1425, 1257, 1184, 1083.  $^1\text{H}$  NMR (500 MHz,  $\text{DMSO-}d_6$ )  $\delta$ : 10.1 (s, 1H), 7.60-7.55 (m, 2H), 7.22-7.13 (m, 4H), 6.93 (d,  $J_{\text{H-H}} = 7.4$  Hz, 1H), 5.99 (s, 1H), 3.33 (s, 3H), 3.30-3.09 (m, 2H), 2.25 (s, 3H), 1.63 (s, 3H).  $^{13}\text{C}$  NMR (126 MHz,  $\text{DMSO-}d_6$ )  $\delta$ : 172.2 (C=O), 161.4 (t,  $J_{\text{F-C}} = 30.2$  Hz, C=O), 161.3 (C=O), 151.8, 148.9, 138.1, 137.5, 137.2, 132.8, 128.8, 125.9, 123.0, 121.6, 118.2, 116.8 (t,  $J_{\text{F-C}} = 257.4$  Hz), 115.1, 108.8, 92.9, 45.0 (t,  $J_{\text{F-C}} = 22.6$  Hz), 43.2 (d,  $J_{\text{F-C}} = 3.6$  Hz), 31.9, 30.0, 21.5.  $^{19}\text{F}$  NMR (471 MHz,  $\text{DMSO-}d_6$ )  $\delta$ : -97.3 (d,  $J_{\text{F-C}} = 255.2$  Hz, 1F), -102.7 (d,  $J_{\text{F-C}} = 255.2$  Hz, 1F). HR MS (ESI)  $m/z$ : calcd for  $\text{C}_{23}\text{H}_{20}\text{F}_2\text{N}_2\text{O}_4\text{Na}$  [ $\text{M} + \text{Na}$ ] $^+$  449.1283, found 449.1264.

**3-(4,6-Dimethyl-2,5-dioxo-2,4,5,6-tetrahydropyrano[2,3,4-ij]isoquinolin-6-yl)-2,2-difluoro-N-(o-tolyl)propanamide (4c)**

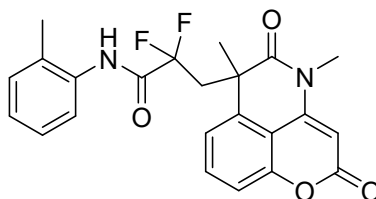

White solid (53.7 mg, 63%), m.p. 173.1-174.1 °C,  $R_f = 0.291$  (EA/PE = 1:2). IR (KBr)  $\nu(\text{cm}^{-1})$ : 3293, 2917, 1709, 1687, 1618, 1560, 1529, 1501, 1425, 1353, 1203, 1079.  $^1\text{H}$  NMR (500 MHz,  $\text{DMSO-}d_6$ )  $\delta$ : 9.99 (s, 1H), 7.69 (t,  $J_{\text{H-H}} = 8.0$  Hz, 1H), 7.63 (d,  $J_{\text{H-H}} = 7.9$  Hz, 1H), 7.34 (d,  $J_{\text{H-H}} = 8.2$  Hz, 1H), 7.22-7.21 (m, 1H), 7.17-7.16 (m, 2H), 6.98-6.96 (m, 1H), 6.01 (s, 1H), 3.36 (s, 3H), 3.30-3.13 (m, 2H), 2.04 (s, 3H), 1.65 (s, 3H).  $^{13}\text{C}$  NMR (126 MHz,  $\text{DMSO-}d_6$ )  $\delta$ : 172.4 (C=O), 162.1 (t,  $J_{\text{F-C}} = 28.3$  Hz, C=O), 161.3 (C=O), 151.9, 149.0, 138.1, 134.5, 134.2, 132.9, 130.8, 127.3, 127.0, 126.5, 123.1, 117.3 (t,  $J_{\text{F-C}} = 251.1$  Hz), 115.2, 108.7, 92.8, 44.6 (t,  $J_{\text{F-C}} = 22.6$  Hz), 43.3, 31.9, 30.0, 17.8.  $^{19}\text{F}$  NMR (471 MHz,  $\text{DMSO-}d_6$ )  $\delta$ : -99.0 (d,  $J_{\text{F-C}} = 256.6$  Hz, 1F), -102.1 (d,  $J_{\text{F-C}} = 256.6$  Hz, 1F). HR MS (ESI)  $m/z$ : calcd for  $\text{C}_{23}\text{H}_{21}\text{F}_2\text{N}_2\text{O}_4$  [ $\text{M} + \text{H}$ ] $^+$  427.1464, found 427.1464.

**3-(4,6-Dimethyl-2,5-dioxo-2,4,5,6-tetrahydropyrano[2,3,4-ij]isoquinolin-6-yl)-N-(4-ethylphenyl)-2,2-difluoropropanamide (4d)**

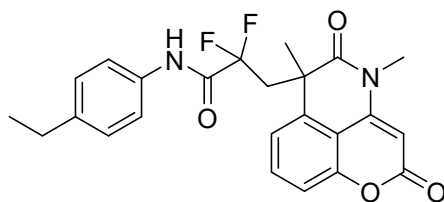

White solid (74.8 mg, 85%), m.p. 157.1-158.1 °C,  $R_f = 0.314$  (EA/PE = 1:2.5). IR (KBr)  $\nu(\text{cm}^{-1})$ : 3275, 2952, 1681, 1612, 1532, 1425, 1345, 1284, 1189, 1077.  $^1\text{H}$  NMR (500 MHz,  $\text{DMSO-}d_6$ )  $\delta$ : 10.1 (s, 1H), 7.61-7.56 (m, 2H), 7.35 (d,  $J_{\text{H-H}} = 8.4$  Hz, 2H), 7.21 (d,  $J_{\text{H-H}} = 7.5$  Hz, 1H), 7.12 (d,  $J_{\text{H-H}} = 8.4$  Hz, 2H), 5.99 (s, 1H), 3.34 (s, 3H), 3.31-3.11 (m, 2H), 2.57-2.51 (m, 2H), 1.64 (s, 3H), 1.15 (t,  $J_{\text{H-H}} = 7.6$  Hz, 3H).  $^{13}\text{C}$  NMR (126 MHz,  $\text{DMSO-}d_6$ )  $\delta$ : 172.2 (C=O), 161.4 (t,  $J_{\text{F-C}} = 28.8$  Hz, C=O), 161.3 (C=O), 151.8, 148.9, 140.7, 137.6, 135.0, 132.8, 128.1, 123.0, 121.1, 117.0 (dd,  $J_{\text{F-C}} = 252.0$  Hz,  $J_{\text{F-C}} = 252.0$  Hz), 115.1, 108.8, 92.8, 44.9 (t,  $J_{\text{F-C}} = 22.3$  Hz), 43.3 (d,  $J_{\text{F-C}} = 2.6$  Hz), 31.8, 29.9, 28.0, 16.0.  $^{19}\text{F}$  NMR (471 MHz,  $\text{DMSO-}d_6$ )  $\delta$ : -97.7 (d,  $J_{\text{F-C}} = 255.4$  Hz, 1F), -102.5 (d,  $J_{\text{F-C}} = 255.4$  Hz, 1F). HR MS (ESI)  $m/z$ : calcd for  $\text{C}_{24}\text{H}_{23}\text{F}_2\text{N}_2\text{O}_4$   $[\text{M} + \text{H}]^+$  441.1620, found 441.1618.

***N*-(4-(*tert*-Butyl)phenyl)-3-(4,6-dimethyl-2,5-dioxo-2,4,5,6-tetrahydropyrano[2,3,4-*ij*]isoquinolin-6-yl)-2,2-difluoropropanamide (4e)**

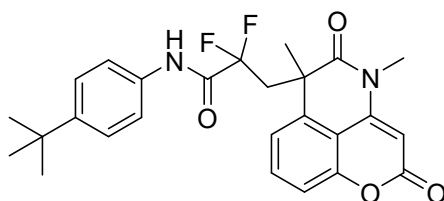

White solid (57.1 mg, 61%), m.p. 172.5-173.5 °C,  $R_f = 0.295$  (EA/PE = 1:3). IR (KBr)  $\nu(\text{cm}^{-1})$ : 3340, 2951, 1744, 1702, 1677, 1604, 1542, 1498, 1427, 1350, 1261, 1187.  $^1\text{H}$  NMR (500 MHz,  $\text{DMSO-}d_6$ ) : 10.1 (s, 1H), 7.62-7.57 (m, 2H), 7.37 (d,  $J_{\text{H-H}} = 8.7$  Hz, 2H), 7.30 (d,  $J_{\text{H-H}} = 8.7$  Hz, 2H), 7.21 (d,  $J_{\text{H-H}} = 7.5$  Hz, 1H), 5.99 (s, 1H), 3.35 (s, 3H), 3.31-3.11 (m, 2H), 1.65 (s, 3H), 1.25 (s, 9H).  $^{13}\text{C}$  NMR (126 MHz,  $\text{DMSO-}d_6$ )  $\delta$ : 172.2 (C=O), 161.4 (t,  $J_{\text{F-C}} = 28.8$  Hz, C=O), 161.3 (C=O), 151.8, 148.9, 147.6, 137.6, 148.9, 147.6, 137.6, 134.7, 132.8, 125.6, 123.0, 120.8, 117.0 (t,  $J_{\text{F-C}} = 256.0$  Hz), 115.1, 108.8, 92.9, 44.9 (t,  $J_{\text{F-C}} = 22.6$  Hz), 43.3 (d,  $J_{\text{F-C}} = 3.3$  Hz), 34.9, 31.9, 31.5, 29.9.  $^{19}\text{F}$  NMR (471 MHz,  $\text{DMSO-}d_6$ )  $\delta$ : -98.0 (d,  $J_{\text{F-C}} = 256.6$  Hz, 1F), -102.2 (d,  $J_{\text{F-C}} = 256.6$  Hz, 1F). HR MS (ESI)  $m/z$ : calcd for  $\text{C}_{26}\text{H}_{27}\text{F}_2\text{N}_2\text{O}_4$   $[\text{M} + \text{H}]^+$  469.1933, found 469.1930.

**3-(4,6-Dimethyl-2,5-dioxo-2,4,5,6-tetrahydropyrano[2,3,4-*ij*]isoquinolin-6-yl)-2,2-difluoro-*N*-(4-methoxyphenyl)propanamide (4f)**

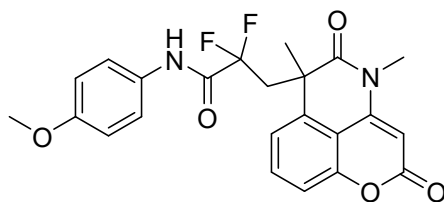

White solid (48.6 mg, 55%), m.p. 100.1-101.1 °C,  $R_f = 0.28$  (EA/DCM/PE = 1:5:4). IR (KBr)  $\nu(\text{cm}^{-1})$ : 3294, 3056, 1683, 1613, 1507, 1411, 1350, 1244, 1181, 1078.  $^1\text{H NMR}$  (500 MHz,  $\text{DMSO-}d_6$ )  $\delta$ : 10.0 (s, 1H), 7.59-7.55 (m, 2H), 7.34 (d,  $J_{\text{H-H}} = 8.9$  Hz, 2H), 7.21 (d,  $J_{\text{H-H}} = 6.8$  Hz, 1H), 6.84 (d,  $J_{\text{H-H}} = 8.9$  Hz, 2H), 5.99 (s, 1H), 3.71 (s, 3H), 3.33 (s, 3H), 3.27-3.08 (m, 2H), 1.64 (s, 3H).  $^{13}\text{C NMR}$  (126 MHz,  $\text{DMSO-}d_6$ )  $\delta$ : 172.2 (C=O), 161.3 (C=O), 156.6 (C=O), 151.8, 148.9, 137.5, 132.8, 130.3, 123.0, 122.5, 115.1, 114.0, 108.8, 92.9, 55.6, 43.3, 31.8, 29.9.  $^{19}\text{F NMR}$  (471 MHz,  $\text{DMSO-}d_6$ )  $\delta$ : -97.4 (d,  $J_{\text{F-C}} = 255.0$  Hz, 1F), -102.7 (d,  $J_{\text{F-C}} = 255.0$  Hz, 1F). HR MS (ESI)  $m/z$ : calcd for  $\text{C}_{23}\text{H}_{21}\text{F}_2\text{N}_2\text{O}_5$  [M + H]<sup>+</sup> 443.1413, found 443.1409.

***N*-(3,4-Dimethoxyphenyl)-3-(4,6-dimethyl-2,5-dioxo-2,4,5,6-tetrahydropyrano[2,3,4-*ij*]isoquinolin-6-yl)-2,2-difluoropropanamide (4g)**

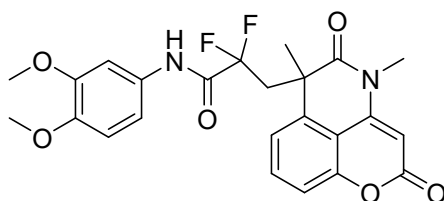

White solid (66.1 mg, 70%), m.p. 126.3-127.3 °C,  $R_f = 0.32$  (EA/PE = 1:1). IR (KBr)  $\nu(\text{cm}^{-1})$ : 3578, 3095, 1681, 1621, 1561, 1513, 1452, 1425, 1347, 1229, 1135, 1077.  $^1\text{H NMR}$  (500 MHz,  $\text{DMSO-}d_6$ )  $\delta$ : 10.0 (s, 1H), 7.60-7.55 (m, 1H), 7.19 (d,  $J_{\text{H-H}} = 7.6$  Hz, 1H), 7.07-7.04 (m, 2H), 6.85 (d,  $J_{\text{H-H}} = 8.7$  Hz, 1H), 5.98 (s, 1H), 3.72 (s, 3H), 3.69 (s, 3H), 3.34 (s, 3H), 3.30-3.09 (m, 2H), 1.63 (s, 3H).  $^{13}\text{C NMR}$  (126 MHz,  $\text{DMSO-}d_6$ )  $\delta$ : 172.2 (C=O), 161.3 (C=O), 161.0 (C=O), 151.8, 148.9, 148.5, 146.2, 137.4, 132.7, 130.6, 123.0, 117.0 (t,  $J_{\text{F-C}} = 251.1$  Hz), 115.1, 112.9, 111.8, 108.8, 105.7, 92.9, 56.0, 55.6, 45.0 (t,  $J_{\text{F-C}} = 22.6$  Hz), 43.2 (d,  $J_{\text{F-C}} = 3.3$  Hz), 31.8, 29.9.  $^{19}\text{F NMR}$  (471 MHz,  $\text{DMSO-}d_6$ )  $\delta$ : -97.1 (d,  $J_{\text{F-C}} = 256.6$  Hz, 1F), -103.0 (d,  $J_{\text{F-C}} = 256.6$  Hz, 1F). HR MS (ESI)  $m/z$ : calcd for  $\text{C}_{24}\text{H}_{23}\text{F}_2\text{N}_2\text{O}_6$  [M + H]<sup>+</sup> 473.1519, found 473.1521.

**3-(4,6-Dimethyl-2,5-dioxo-2,4,5,6-tetrahydropyrano[2,3,4-*ij*]isoquinolin-6-yl)-2,2-difluoro-*N*-(4-fluorophenyl)propanamide (4h)**

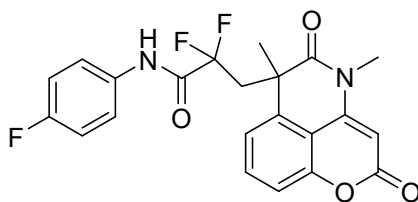

White solid (64.5 mg, 75%), m.p. 225.4-226.4 °C,  $R_f = 0.33$  (EA/PE = 1:2). IR (KBr)  $\nu(\text{cm}^{-1})$ : 3288, 2916, 1697, 1678, 1620, 1563, 1532, 1506, 1425, 1282, 1209, 1063.  $^1\text{H}$  NMR (500 MHz,  $\text{DMSO-}d_6$ )  $\delta$ : 10.2 (s, 1H), 7.58-7.54 (m, 2H), 7.46-7.44 (m, 2H), 7.18 (dd,  $J_{\text{H-H}} = 6.8$  Hz,  $J_{\text{H-H}} = 2.5$  Hz, 1H), 7.12 (t,  $J_{\text{H-H}} = 8.1$  Hz, 2H), 5.98 (s, 1H), 3.33 (s, 3H), 3.31-3.09 (m, 2H), 1.63 (s, 3H).  $^{13}\text{C}$  NMR (126 MHz,  $\text{DMSO-}d_6$ )  $\delta$ : 172.2 (C=O), 161.5 (t,  $J_{\text{F-C}} = 28.8$  Hz, C=O), 161.3 (C=O), 159.3 (d,  $J_{\text{F-C}} = 242.2$  Hz), 151.8, 148.9, 137.4, 133.7 (d,  $J_{\text{F-C}} = 2.5$  Hz), 132.7, 123.0 (d,  $J_{\text{F-C}} = 21.7$  Hz), 122.8, 116.9 (dd,  $J_{\text{F-C}} = 252.0$  Hz,  $J_{\text{F-C}} = 252.0$  Hz), 115.6 (d,  $J_{\text{F-C}} = 22.3$  Hz), 115.1, 108.8, 92.9, 45.0 (t,  $J_{\text{F-C}} = 22.5$  Hz), 43.2 (d,  $J_{\text{F-C}} = 3.9$  Hz), 31.8, 29.9.  $^{19}\text{F}$  NMR (471 MHz,  $\text{DMSO-}d_6$ )  $\delta$ : -97.2 (d,  $J_{\text{F-C}} = 255.4$  Hz, 1F), -103.1 (d,  $J_{\text{F-C}} = 255.4$  Hz, 1F), -117.2 (s, 1F). HR MS (ESI)  $m/z$ : calcd for  $\text{C}_{22}\text{H}_{18}\text{F}_3\text{N}_2\text{O}_4$  [ $\text{M} + \text{H}$ ] $^+$  431.1213, found 431.1207.

***N*-(4-Chlorophenyl)-3-(4,6-dimethyl-2,5-dioxo-2,4,5,6-tetrahydropyrano[2,3,4-*ij*]isoquinolin-6-yl)-2,2-difluoropropanamide (4i)**

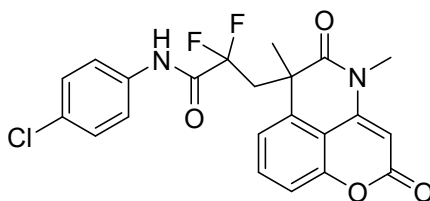

White solid (71.4 mg, 80%), m.p. 221.7-222.7 °C,  $R_f = 0.274$  (EA/PE = 1:2). IR (KBr)  $\nu(\text{cm}^{-1})$ : 3295, 1681, 1613, 1526, 1354, 1280, 1184, 1079.  $^1\text{H}$  NMR (500 MHz,  $\text{DMSO-}d_6$ )  $\delta$ : 10.3 (s, 1H), 7.59-7.54 (m, 2H), 7.48 (d,  $J_{\text{H-H}} = 8.8$  Hz, 2H), 7.35 (t,  $J_{\text{H-H}} = 8.8$  Hz, 2H), 7.18 (dd,  $J_{\text{H-H}} = 7.0$  Hz,  $J_{\text{H-H}} = 1.7$  Hz, 1H), 5.99 (s, 1H), 3.34 (s, 3H), 3.29-3.10 (m, 2H), 1.64 (s, 3H).  $^{13}\text{C}$  NMR (126 MHz,  $\text{DMSO-}d_6$ )  $\delta$ : 172.2 (C=O), 161.7 (t,  $J_{\text{F-C}} = 28.9$  Hz, C=O), 161.3 (C=O), 151.8, 148.9, 137.3, 136.3, 132.8, 129.0, 128.9, 123.0, 122.5, 122.4, 116.9 (t,  $J_{\text{F-C}} = 252.0$  Hz), 115.2, 108.8, 92.9, 44.9 (t,  $J_{\text{F-C}} = 22.7$  Hz), 43.3 (d,  $J_{\text{F-C}} = 3.2$  Hz), 31.8, 30.0.  $^{19}\text{F}$  NMR (471 MHz,  $\text{DMSO-}d_6$ )  $\delta$ : -97.1 (d,  $J_{\text{F-C}} = 255.8$  Hz, 1F), -103.2 (d,  $J_{\text{F-C}} = 255.8$  Hz, 1F). HR MS (ESI)  $m/z$ : calcd for  $\text{C}_{22}\text{H}_{18}\text{ClF}_2\text{N}_2\text{O}_4$  [ $\text{M} + \text{H}$ ] $^+$  447.0918, found 447.0906.

***N*-(3-Chlorophenyl)-3-(4,6-dimethyl-2,5-dioxo-2,4,5,6-tetrahydropyrano[2,3,4-*ij*]isoquinolin-6-yl)-2,2-difluoropropanamide (4j)**

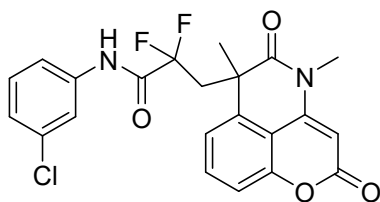

White solid (53.5 mg, 60%), m.p. 223.8-224.8 °C,  $R_f = 0.305$  (EA/PE = 1.5:1). IR (KBr)  $\nu(\text{cm}^{-1})$ : 3291, 2993, 1684, 1606, 1428, 1540, 1347, 1276, 1183, 1077.  $^1\text{H}$  NMR (500 MHz,  $\text{DMSO-}d_6$ )  $\delta$ : 10.3 (s, 1H), 7.57 (d,  $J_{\text{H-H}} = 5.8$  Hz, 3H), 7.40 (d,  $J_{\text{H-H}} = 8.3$  Hz, 1H), 7.32 (t,  $J_{\text{H-H}} = 8.1$  Hz, 1H), 7.20-7.16 (m, 2H), 6.00 (s, 1H), 3.36 (s, 3H), 3.33-3.12 (m, 2H), 1.66 (s, 3H).  $^{13}\text{C}$  NMR (126 MHz,  $\text{DMSO-}d_6$ )  $\delta$ : 172.2 (C=O), 161.8 (t,  $J_{\text{F-C}} = 28.6$  Hz, C=O), 161.2 (C=O), 151.8, 148.9, 138.7, 137.3, 133.2, 132.7, 130.6, 125.0, 123.0, 120.4, 119.3, 116.7 (t,  $J_{\text{F-C}} = 252.0$  Hz), 115.1, 108.8, 93.0, 45.0 (t,  $J_{\text{F-C}} = 22.5$  Hz), 43.2 (d,  $J_{\text{F-C}} = 3.9$  Hz), 31.8, 29.9.  $^{19}\text{F}$  NMR (471 MHz,  $\text{DMSO-}d_6$ )  $\delta$ : -97.2 (d,  $J_{\text{F-C}} = 255.7$  Hz, 1F), -103.3 (d,  $J_{\text{F-C}} = 255.7$  Hz, 1F). HR MS (ESI)  $m/z$ : calcd for  $\text{C}_{22}\text{H}_{18}\text{ClF}_2\text{N}_2\text{O}_4$  [M + H] $^+$  447.0918, found 447.0911.

***N*-(4-Bromophenyl)-3-(4,6-dimethyl-2,5-dioxo-2,4,5,6-tetrahydropyrano[2,3,4-*ij*]isoquinolin-6-yl)-2,2-difluoropropanamide (4k)**

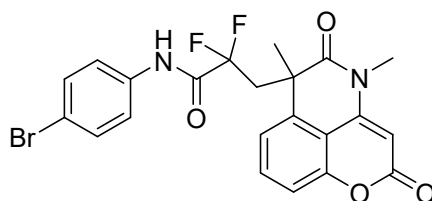

White solid (70.6 mg, 72%), m.p. 206.3-207.3 °C,  $R_f = 0.279$  (EA/PE = 1:2). IR (KBr)  $\nu(\text{cm}^{-1})$ : 3300, 1699, 1681, 1619, 1562, 1528, 1491, 1427, 1400, 1353, 1279, 1062.  $^1\text{H}$  NMR (500 MHz,  $\text{DMSO-}d_6$ )  $\delta$ : 10.3 (s, 1H), 7.59-7.55 (m, 2H), 7.48 (d,  $J_{\text{H-H}} = 8.9$  Hz, 2H), 7.43 (d,  $J_{\text{H-H}} = 8.9$  Hz, 2H), 7.19 (dd,  $J_{\text{H-H}} = 6.8$  Hz,  $J_{\text{H-H}} = 2.5$  Hz, 1H), 6.00 (s, 1H), 3.34 (s, 3H), 3.30-3.11 (m, 2H), 1.64 (s, 3H).  $^{13}\text{C}$  NMR (126 MHz,  $\text{DMSO-}d_6$ )  $\delta$ : 172.2 (C=O), 161.6 (t,  $J_{\text{F-C}} = 29.0$  Hz, C=O), 161.3 (C=O), 151.8, 148.9, 137.4, 136.7, 132.8, 131.8, 123.0, 122.8, 117.2, 116.8 (dd,  $J_{\text{F-C}} = 251.9$  Hz,  $J_{\text{F-C}} = 251.9$  Hz), 115.2, 108.8, 92.9, 44.9 (t,  $J_{\text{F-C}} = 22.6$  Hz), 43.3 (d,  $J_{\text{F-C}} = 3.5$  Hz), 31.8, 30.0.  $^{19}\text{F}$  NMR (471 MHz,  $\text{DMSO-}d_6$ )  $\delta$ : -97.1 (d,  $J_{\text{F-C}} = 256.0$  Hz, 1F), -103.1 (d,  $J_{\text{F-C}} = 256.0$  Hz, 1F). HR MS (ESI)  $m/z$ : calcd for  $\text{C}_{22}\text{H}_{18}\text{BrF}_2\text{N}_2\text{O}_4$  [M + H] $^+$  491.0413, found 491.0409.

**3-(4,6-Dimethyl-2,5-dioxo-2,4,5,6-tetrahydropyrano[2,3,4-*ij*]isoquinolin-6-yl)-2,2-difluoro-*N*-(4-iodophenyl)propanamide (4l)**

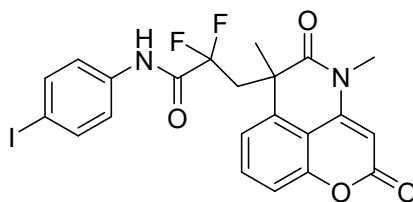

White solid (76.4 mg, 71%), m.p. 114.3-115.3 °C,  $R_f = 0.285$  (EA/PE = 1:2). IR (KBr)  $\nu(\text{cm}^{-1})$ : 3005, 1684, 1614, 1534, 1457, 1342, 1316, 1181, 1084.  $^1\text{H}$  NMR (500 MHz,  $\text{DMSO-}d_6$ )  $\delta$ : 10.3 (s, 1H), 7.63 (d,  $J_{\text{H-H}} = 8.7$  Hz, 2H), 7.59-7.54 (m, 2H), 7.28 (d,  $J_{\text{H-H}} = 8.7$  Hz, 2H), 7.19 (d,  $J_{\text{H-H}} = 7.4$  Hz, 1H), 5.99 (s, 1H), 3.33 (s, 3H), 3.28-3.10 (m, 2H), 1.64 (s, 3H).  $^{13}\text{C}$  NMR (126 MHz,  $\text{DMSO-}d_6$ )  $\delta$ : 172.2 (C=O), 161.6 (t,  $J_{\text{F-C}} = 28.6$  Hz, C=O), 161.3 (C=O), 151.8, 148.9, 137.7, 137.4, 137.2, 132.8, 123.1, 123.0, 122.9, 116.9 (t,  $J_{\text{F-C}} = 252.0$  Hz), 115.2, 108.8, 92.9, 89.6, 44.9 (t,  $J_{\text{F-C}} = 22.5$  Hz), 43.2, 31.8, 30.0.  $^{19}\text{F}$  NMR (471 MHz,  $\text{DMSO-}d_6$ )  $\delta$ : -97.2 (d,  $J_{\text{F-C}} = 256.1$  Hz, 1F), -103.0 (d,  $J_{\text{F-C}} = 256.1$  Hz, 1F). HR MS (ESI)  $m/z$ : calcd for  $\text{C}_{22}\text{H}_{18}\text{F}_2\text{IN}_2\text{O}_4$   $[\text{M} + \text{H}]^+$  539.0274, found 539.0278.

**3-(4,6-Dimethyl-2,5-dioxo-2,4,5,6-tetrahydropyrano[2,3,4-ij]isoquinolin-6-yl)-2,2-difluoro-N-(pyridin-3-yl)propanamide (4m)**

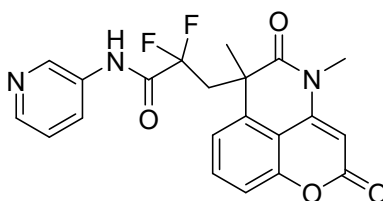

White solid (70.2 mg, 85%), m.p. 203.8-204.8 °C,  $R_f = 0.274$  (EA/PE = 3:1). IR (KBr)  $\nu(\text{cm}^{-1})$ : 3387, 3055, 1680, 1610, 1551, 1483, 1420, 1342, 1271, 1180, 1021.  $^1\text{H}$  NMR (500 MHz,  $\text{DMSO-}d_6$ )  $\delta$ : 10.4 (s, 1H), 8.62 (d,  $J_{\text{H-H}} = 1.5$  Hz, 1H), 8.34 (d,  $J_{\text{H-H}} = 4.5$  Hz, 1H), 7.85 (d,  $J_{\text{H-H}} = 8.2$  Hz, 1H), 7.57-7.55 (m, 2H), 7.36-7.33 (m, 1H), 7.17-7.15 (m, 1H), 6.02 (s, 1H), 3.43 (s, 3H), 3.36-3.14 (m, 2H), 1.66 (s, 3H).  $^{13}\text{C}$  NMR (126 MHz,  $\text{DMSO-}d_6$ )  $\delta$ : 172.2 (C=O), 162.1 (t,  $J_{\text{F-C}} = 28.6$  Hz, C=O), 161.3 (C=O), 151.8, 148.9, 146.1, 142.4, 137.3, 134.1, 132.7, 128.0, 123.9, 123.1, 116.8 (t,  $J_{\text{F-C}} = 252.0$  Hz), 115.2, 108.9, 93.0, 44.9 (t,  $J_{\text{F-C}} = 22.5$  Hz), 43.3 (d,  $J_{\text{F-C}} = 3.9$  Hz), 31.8, 30.0.  $^{19}\text{F}$  NMR (471 MHz,  $\text{DMSO-}d_6$ )  $\delta$ : -96.7 (d,  $J_{\text{F-C}} = 255.8$  Hz, 1F), -103.6 (d,  $J_{\text{F-C}} = 255.8$  Hz, 1F). HR MS (ESI)  $m/z$ : calcd for  $\text{C}_{21}\text{H}_{18}\text{F}_2\text{N}_3\text{O}_4$   $[\text{M} + \text{H}]^+$  414.1260, found 414.1263.

**N-Butyl-3-(4,6-dimethyl-2,5-dioxo-2,4,5,6-tetrahydropyrano[2,3,4-ij]isoquinolin-6-yl)-2,2-difluoropropanamide (4n)**

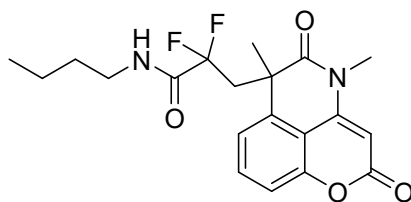

White solid (59.6 mg, 76%), m.p. 139.3-140.3 °C  $R_f = 0.33$  (EA/PE = 1:2). IR (KBr)  $\nu(\text{cm}^{-1})$ : 3344, 2916, 1723, 1686, 1620, 1545, 1504, 1465, 1350, 1255, 1184, 1073.  $^1\text{H}$  NMR (500 MHz,  $\text{CDCl}_3$ )  $\delta$ : 7.62-7.58 (m, 1H), 7.30-7.25 (m, 2H), 6.19 (bs, 1H), 5.82 (s, 1H), 3.44 (s, 3H), 3.31-3.20 (m, 1H), 3.12-2.98 (m, 3H), 1.67 (s, 3H), 1.38-1.35 (m, 2H), 1.27-1.23 (m, 2H), 0.89 (t,  $J_{\text{H-H}} = 6.7$  Hz, 3H).  $^{13}\text{C}$  NMR (126 MHz,  $\text{CDCl}_3$ )  $\delta$ : 172.3 (C=O), 163.1 (t,  $J_{\text{F-C}} = 30.1$  Hz, C=O), 161.7 (C=O), 152.2, 148.6, 136.9, 132.4, 122.1, 116.4 (t,  $J_{\text{F-C}} = 253.8$  Hz), 115.5, 108.5, 92.8, 44.4 (t,  $J_{\text{F-C}} = 22.3$  Hz), 43.4 (d,  $J_{\text{F-C}} = 3.2$  Hz), 39.3, 32.2, 31.0, 29.6, 19.8, 13.6.  $^{19}\text{F}$  NMR (471 MHz,  $\text{CDCl}_3$ )  $\delta$ : -99.5 (d,  $J_{\text{F-C}} = 260.3$  Hz, 1F), -105.2 (d,  $J_{\text{F-C}} = 260.3$  Hz, 1F). HR MS (ESI)  $m/z$ : calcd for  $\text{C}_{20}\text{H}_{22}\text{F}_2\text{N}_2\text{O}_4\text{Na}$   $[\text{M} + \text{Na}]^+$  415.1440, found 415.1442.

**3-(4,6-Dimethyl-2,5-dioxo-2,4,5,6-tetrahydropyrano[2,3,4-ij]isoquinolin-6-yl)-2,2-difluoro-N-hexylpropanamide (4o)**

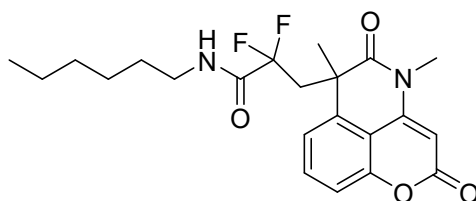

White solid (66.4 mg, 79%), m.p. 109.7-110.7 °C,  $R_f = 0.31$  (EA/PE = 1:3). IR (KBr)  $\nu(\text{cm}^{-1})$ : 3328, 2970, 1682, 1618, 1557, 1503, 1347, 1255, 1190, 1076.  $^1\text{H}$  NMR (500 MHz,  $\text{CDCl}_3$ )  $\delta$ : 7.60 (t,  $J_{\text{H-H}} = 8.1$  Hz, 1H), 7.29-7.25 (m, 2H), 6.18 (s, 1H), 5.81 (s, 1H), 3.43 (s, 3H), 3.30-3.21 (m, 1H), 3.12-2.94 (m, 3H), 1.67 (s, 3H), 1.38-1.35 (m, 2H), 1.27-1.23 (m, 6H), 0.86 (t,  $J_{\text{H-H}} = 6.6$  Hz, 3H).  $^{13}\text{C}$  NMR (126 MHz,  $\text{CDCl}_3$ )  $\delta$ : 172.2 (C=O), 163.1 (t,  $J_{\text{F-C}} = 27.7$  Hz, C=O), 161.6 (C=O), 152.1, 148.6, 136.9, 132.4, 122.1, 116.4 (t,  $J_{\text{F-C}} = 256.4$  Hz), 115.5, 108.5, 92.8, 44.4 (t,  $J_{\text{F-C}} = 22.6$  Hz), 43.4 (d,  $J_{\text{F-C}} = 3.3$  Hz), 39.5, 32.2, 31.3, 29.6, 28.9, 26.3, 22.4, 13.9.  $^{19}\text{F}$  NMR (471 MHz,  $\text{CDCl}_3$ )  $\delta$ : -99.5 (d,  $J_{\text{F-C}} = 260.3$  Hz, 1F), -105.2 (d,  $J_{\text{F-C}} = 260.3$  Hz, 1F). HR MS (ESI)  $m/z$ : calcd for  $\text{C}_{22}\text{H}_{27}\text{F}_2\text{N}_2\text{O}_4$   $[\text{M} + \text{H}]^+$  421.1933, found 421.1938.

**N-Cyclopropyl-3-(4,6-dimethyl-2,5-dioxo-2,4,5,6-tetrahydropyrano[2,3,4-ij]isoquinolin-6-yl)-2,2-difluoropropanamide (4p)**

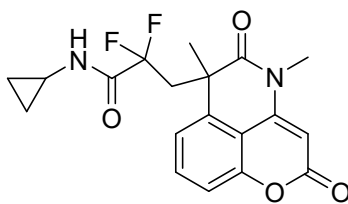

White solid (55.6 mg, 74%), m.p. 224.1-225.1 °C, Rf = 0.293 (EA/PE = 1:1.5). IR (KBr)  $\nu(\text{cm}^{-1})$ : 3349, 2981, 1719, 1682, 1618, 1562, 1526, 1500, 1426, 1353, 1185, 1068.  $^1\text{H}$  NMR (500 MHz, DMSO- $d_6$ )  $\delta$ : 8.40 (d,  $J_{\text{H-H}} = 4.2$  Hz, 1H), 7.66 (t,  $J_{\text{H-H}} = 8.0$  Hz, 1H), 7.53 (d,  $J_{\text{H-H}} = 7.9$  Hz, 1H), 7.32 (d,  $J_{\text{H-H}} = 8.0$  Hz, 1H), 5.99 (s, 1H), 3.35 (s, 3H), 3.18-2.96 (m, 2H), 2.42-2.40 (m, 1H), 1.61 (s, 3H), 0.57-0.48 (m, 2H), 0.37-0.31 (m, 2H).  $^{13}\text{C}$  NMR (126 MHz, DMSO- $d_6$ )  $\delta$ : 172.3 (C=O), 164.0 (t,  $J_{\text{F-C}} = 28.4$  Hz, C=O), 161.4 (C=O), 151.8, 149.0, 137.6, 132.8, 123.1, 116.9 (dd,  $J_{\text{F-C}} = 252.0$  Hz,  $J_{\text{F-C}} = 252.0$  Hz), 115.1, 108.8, 92.8, 44.8 (t,  $J_{\text{F-C}} = 22.3$  Hz), 43.2 (d,  $J_{\text{F-C}} = 3.2$  Hz), 31.8, 29.9, 22.9.  $^{19}\text{F}$  NMR (471 MHz, DMSO- $d_6$ )  $\delta$ : -97.6 (d,  $J_{\text{F-C}} = 255.2$  Hz, 1F), -104.1 (d,  $J_{\text{F-C}} = 255.2$  Hz, 1F). HR MS (ESI)  $m/z$ : calcd for  $\text{C}_{19}\text{H}_{19}\text{F}_2\text{N}_2\text{O}_4$  [M + H] $^+$  377.1307, found 377.1309.

***N*-Cyclopentyl-3-(4,6-dimethyl-2,5-dioxo-2,4,5,6-tetrahydropyrano[2,3,4-*ij*]isoquinolin-6-yl)-2,2-difluoropropanamide (4q)**

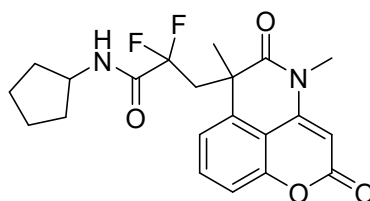

White solid (63.8 mg, 79%), m.p. 154.9-155.9 °C, Rf = 0.307 (EA/PE = 1:1.5). IR (KBr)  $\nu(\text{cm}^{-1})$ : 3270, 2966, 1716, 1668, 1620, 1563, 1502, 1427, 1352, 1251, 1077.  $^1\text{H}$  NMR (500 MHz, DMSO- $d_6$ )  $\delta$ : 8.31-8.27 (m, 1H), 7.66 (t,  $J_{\text{H-H}} = 8.1$  Hz, 1H), 7.52 (d,  $J_{\text{H-H}} = 7.8$  Hz, 1H), 7.32 (d,  $J_{\text{H-H}} = 8.2$  Hz, 1H), 5.99 (s, 1H), 3.69-3.62 (m, 1H), 3.36 (s, 3H), 3.20-2.97 (m, 2H), 1.70-1.64 (m, 1H), 1.61 (s, 3H), 1.58-1.50 (m, 3H), 1.44-1.36 (m, 2H), 1.31-1.17 (m, 2H).  $^{13}\text{C}$  NMR (126 MHz, DMSO- $d_6$ )  $\delta$ : 172.3 (C=O), 162.5 (t,  $J_{\text{F-C}} = 30.9$  Hz, C=O), 161.4 (C=O), 151.8, 149.0, 137.5, 132.7, 123.2, 116.9 (t,  $J_{\text{F-C}} = 256.8$  Hz), 115.1, 108.8, 92.7, 50.9, 44.8 (t,  $J_{\text{F-C}} = 22.1$  Hz), 43.2 (d,  $J_{\text{F-C}} = 3.2$  Hz), 32.1, 31.8, 31.6, 29.9, 24.0.  $^{19}\text{F}$  NMR (471 MHz, DMSO- $d_6$ )  $\delta$ : -96.6 (d,  $J_{\text{F-C}} = 256.2$  Hz, 1F), -104.2 (d,  $J_{\text{F-C}} = 256.2$  Hz, 1F). HR MS (ESI)  $m/z$ : calcd for  $\text{C}_{21}\text{H}_{23}\text{F}_2\text{N}_2\text{O}_4$  [M + H] $^+$  405.1620, found 405.1616.

***N*-Cyclohexyl-3-(4,6-dimethyl-2,5-dioxo-2,4,5,6-tetrahydropyrano[2,3,4-*ij*]isoquinolin-6-yl)-2,2-difluoropropanamide (4r)**

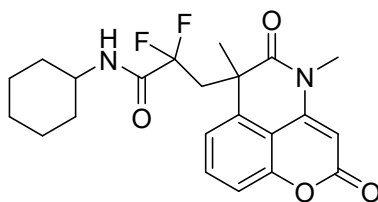

White solid (68.6 mg, 82%), m.p. 181.7-182.7 °C, R<sub>f</sub> = 0.31 (EA/PE = 1:3). IR (KBr)  $\nu$ (cm<sup>-1</sup>): 3270, 2920, 2853, 1712, 1656, 1617, 1559, 1428, 1348, 1257, 1187, 1080. <sup>1</sup>H NMR (500 MHz, DMSO-*d*<sub>6</sub>)  $\delta$ : 8.26 (d, *J*<sub>H-H</sub> = 7.9 Hz, 1H), 7.66 (t, *J*<sub>H-H</sub> = 8.0 Hz, 1H), 7.54 (d, *J*<sub>H-H</sub> = 7.9 Hz, 1H), 7.32 (d, *J*<sub>H-H</sub> = 8.2 Hz, 1H), 5.99 (s, 1H), 3.35 (s, 3H), 3.27-2.97 (m, 3H), 1.63 (bs, 5H), 1.61-1.51 (m, 2H), 1.41-1.39 (m, 1H), 1.19-1.08 (m, 5H). <sup>13</sup>C NMR (126 MHz, DMSO-*d*<sub>6</sub>)  $\delta$ : 172.3 (C=O), 162.1 (t, *J*<sub>F-C</sub> = 28.4 Hz, C=O), 161.3 (C=O), 151.8, 149.0, 137.8, 132.8, 123.1, 117.0 (dd, *J*<sub>F-C</sub> = 251.2 Hz, *J*<sub>F-C</sub> = 251.2 Hz), 115.1, 108.8, 92.6, 48.7, 44.7 (t, *J*<sub>F-C</sub> = 22.1 Hz), 43.2 (d, *J*<sub>F-C</sub> = 3.2 Hz), 32.1, 31.8, 29.9, 25.4, 25.1. <sup>19</sup>F NMR (471 MHz, DMSO-*d*<sub>6</sub>)  $\delta$ : -97.8 (d, *J*<sub>F-C</sub> = 255.5 Hz, 1F), -103.3 (d, *J*<sub>F-C</sub> = 255.5 Hz, 1F). HR MS (ESI) *m/z*: calcd for C<sub>22</sub>H<sub>25</sub>F<sub>2</sub>N<sub>2</sub>O<sub>4</sub> [M + H]<sup>+</sup> 419.1777, found 419.1776.

***N*-Benzyl-3-(4,6-dimethyl-2,5-dioxo-2,4,5,6-tetrahydropyrano[2,3,4-*ij*]isoquinolin-6-yl)-2,2-difluoropropanamide (4s)**

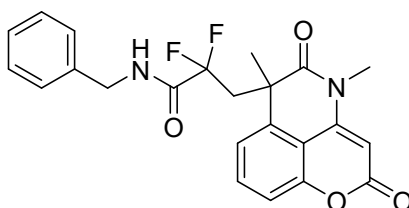

White solid (63.9 mg, 75%), m.p. 157.8-158.8 °C, R<sub>f</sub> = 0.28 (EA/PE = 1:2). IR (KBr)  $\nu$ (cm<sup>-1</sup>): 3255, 2984, 1720, 1679, 1621, 1562, 1499, 1300, 1258, 1141, 1082. <sup>1</sup>H NMR (500 MHz, DMSO-*d*<sub>6</sub>)  $\delta$ : 9.00 (t, *J*<sub>H-H</sub> = 5.9 Hz, 1H), 7.67 (t, *J*<sub>H-H</sub> = 8.0 Hz, 1H), 7.57 (d, *J*<sub>H-H</sub> = 7.9 Hz, 1H), 7.34-7.28 (m, 3H), 7.22 (t, *J*<sub>H-H</sub> = 7.2 Hz, 1H), 7.13 (d, *J*<sub>H-H</sub> = 7.5 Hz, 2H), 6.01 (s, 1H), 4.12-4.07 (m, 1H), 3.96-3.92 (m, 1H), 3.36 (s, 3H), 3.24-3.02 (m, 2H), 1.63 (s, 3H). <sup>13</sup>C NMR (126 MHz, DMSO-*d*<sub>6</sub>)  $\delta$ : 172.3 (C=O), 163.3 (t, *J*<sub>F-C</sub> = 28.3 Hz, C=O), 161.4 (C=O), 151.8, 149.0, 138.5, 137.6, 132.7, 128.7, 127.6, 127.4, 123.1, 117.2 (dd, *J*<sub>F-C</sub> = 251.1 Hz, *J*<sub>F-C</sub> = 251.1 Hz), 115.2, 108.8, 92.8, 44.8 (t, *J*<sub>F-C</sub> = 22.6 Hz), 43.2 (d, *J*<sub>F-C</sub> = 3.5 Hz), 42.5, 31.7, 29.9. <sup>19</sup>F NMR (471 MHz, DMSO-*d*<sub>6</sub>)  $\delta$ : -98.2 (d, *J*<sub>F-C</sub> = 255.4 Hz, 1F), -103.9 (d, *J*<sub>F-C</sub> = 255.4 Hz, 1F). HR MS (ESI) *m/z*: calcd for C<sub>23</sub>H<sub>21</sub>F<sub>2</sub>N<sub>2</sub>O<sub>4</sub> [M + H]<sup>+</sup> 427.1464, found 427.1461.

***N*-(3,4-Dimethoxyphenethyl)-3-(4,6-dimethyl-2,5-dioxo-2,4,5,6-tetrahydropyrano[2,3,4-**

***ij*]-isoquinolin-6-yl)-2,2-difluoropropanamide (4t)**

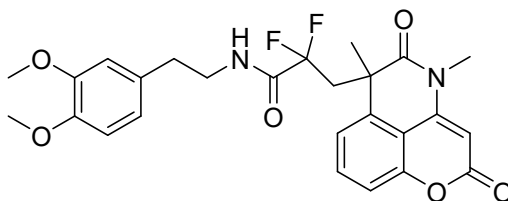

White solid (75.0 mg, 75%), m.p. 158.7-159.7 °C,  $R_f = 0.297$  (EA/PE = 1.5:1). IR (KBr)  $\nu(\text{cm}^{-1})$ : 3274, 2919, 1685, 1622, 1562, 1512, 1455, 1425, 1352, 1257, 1187, 1075.  $^1\text{H}$  NMR (500 MHz,  $\text{CDCl}_3$ )  $\delta$ : 7.59 (t,  $J_{\text{H-H}} = 8.1$  Hz, 1H), 7.29-7.23 (m, 2H), 6.78 (d,  $J_{\text{H-H}} = 7.9$  Hz, 1H), 6.63 (d,  $J_{\text{H-H}} = 8.1$  Hz, 2H), 6.27 (s, 1H), 5.78 (s, 1H), 3.84 (s, 3H), 3.82 (s, 3H), 3.40 (s, 3H), 3.37-3.32 (m, 1H), 3.27-3.15 (m, 2H), 3.05-2.95 (m, 1H), 2.64 (t,  $J_{\text{H-H}} = 7.0$  Hz, 2H), 1.66 (s, 3H).  $^{13}\text{C}$  NMR (126 MHz,  $\text{CDCl}_3$ )  $\delta$ : 172.2 (C=O), 163.2 (t,  $J_{\text{F-C}} = 28.1$  Hz, C=O), 161.6 (C=O), 152.1, 148.9, 148.5, 147.7, 136.8, 132.4, 130.3, 122.1, 120.5, 116.3 (d,  $J_{\text{F-C}} = 254.2$  Hz), 115.5, 111.7, 111.3, 108.5, 92.7, 55.9, 55.7, 44.3 (t,  $J_{\text{F-C}} = 22.3$  Hz), 43.4 (d,  $J_{\text{F-C}} = 3.1$  Hz), 40.7, 34.6, 32.2, 29.6.  $^{19}\text{F}$  NMR (471 MHz,  $\text{CDCl}_3$ )  $\delta$ : -99.4 (d,  $J_{\text{F-C}} = 260.6$  Hz, 1F), -105.0 (d,  $J_{\text{F-C}} = 260.6$  Hz, 1F). HR MS (ESI)  $m/z$ : calcd for  $\text{C}_{26}\text{H}_{27}\text{F}_2\text{N}_2\text{O}_6$  [ $\text{M} + \text{H}$ ] $^+$  501.1832, found 501.1828.

**3-(4,6-Dimethyl-2,5-dioxo-2,4,5,6-tetrahydropyrano[2,3,4-*ij*]-isoquinolin-6-yl)-*N,N*-diethyl-2,2-difluoropropanamide (4u)**

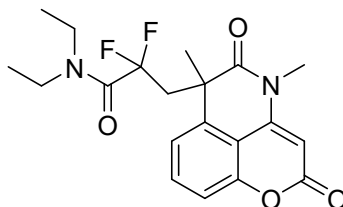

White solid (62.7 mg, 80%), m.p. 156.5-157.4 °C,  $R_f = 0.286$  (EA/PE = 1:2). IR (KBr)  $\nu(\text{cm}^{-1})$ : 3088, 2979, 1716, 1679, 1650, 1614, 1559, 1500, 1451, 1430, 1345, 1258, 1189, 1094.  $^1\text{H}$  NMR (500 MHz,  $\text{CDCl}_3$ )  $\delta$ : 7.59 (t,  $J_{\text{H-H}} = 8.1$  Hz, 1H), 7.29-7.25 (m, 2H), 5.84 (s, 1H), 3.51-3.40 (m, 4H), 3.29-3.24 (m, 4H), 3.03-2.93 (m, 1H), 1.71 (s, 3H), 1.08-1.02 (m, 6H).  $^{13}\text{C}$  NMR (126 MHz,  $\text{CDCl}_3$ )  $\delta$ : 167.7 (C=O), 157.1 (C=O), 157.0 (t,  $J_{\text{F-C}} = 28.1$  Hz, C=O), 147.4, 144.0, 133.1, 127.5, 117.5, 113.4 (t,  $J_{\text{F-C}} = 257.7$  Hz), 110.5, 103.8, 87.9, 40.7 (t,  $J_{\text{F-C}} = 20.5$  Hz), 38.3 (d,  $J_{\text{F-C}} = 1.7$  Hz), 36.9 (t,  $J_{\text{F-C}} = 6.5$  Hz), 27.5, 24.8, 9.3, 7.4.  $^{19}\text{F}$  NMR (471 MHz,  $\text{CDCl}_3$ )  $\delta$ : -101.2 (d,  $J_{\text{F-C}} = 278.9$  Hz, 1F), -103.1 (d,  $J_{\text{F-C}} = 278.9$  Hz, 1F). HR MS (ESI)  $m/z$ : calcd for  $\text{C}_{20}\text{H}_{23}\text{F}_2\text{N}_2\text{O}_4$  [ $\text{M} + \text{H}$ ] $^+$  393.1620, found 393.1618.

### 1.6 Synthesis of 3-(4,6-Dimethyl-2,5-dioxo-2,4,5,6-tetrahydropyrano[2,3,4-ij]isoquinolin-6-yl)-2,2-difluoro-N-(3-fluoro-4-morpholinophenyl)propanamide (8)

A Schlenk-tube was charged with *N*-methyl-*N*-(2-oxo-2*H*-chromen-4-yl)methacrylamide **1a** (0.2 mmol, 48.6 mg), 2-bromo-2,2-difluoro-*N*-(3-fluoro-4-morpholinophenyl)acetamide **2a** (0.4 mmol, 140.8 mg), K<sub>2</sub>S<sub>2</sub>O<sub>8</sub> (0.4 mmol, 108 mg), TMEDA (0.4 mmol, 46.4 mg) and MeCN-H<sub>2</sub>O (3 mL, v/v, 2:1). The tube was stirred under the irradiation of 10 W blue LEDs (430 nm) at room temperature under N<sub>2</sub> atmosphere. After 6 hours, the mixture was transferred into a 100 mL separating funnel which contained 20 mL saturated sodium chloride solution. The mixture was extracted with ethyl acetate (10 mL × 2). The combined organic phase was dried over anhydrous Na<sub>2</sub>SO<sub>4</sub> and concentrated under vacuum. The residue was purified by flash column chromatography using a mixture of ethyl acetate /petroleum ether as eluent to give the desired product **8**.

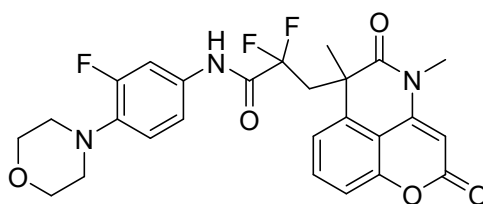

White solid (41.2 mg, 40%), m.p. 137.1-138.1 °C, R<sub>f</sub> = 0.289 (EA/PE = 1:1). IR (KBr)  $\nu$ (cm<sup>-1</sup>): 2853, 1729, 1686, 1521, 1560, 1545, 1502, 1427, 1351, 1259, 1207, 1182. <sup>1</sup>H NMR (500 MHz, DMSO-*d*<sub>6</sub>)  $\delta$ : 10.2 (s, 1H), 7.60-7.55 (m, 2H), 7.31-7.28 (m, 1H), 7.21-7.18 (m, 2H), 6.95 (t, *J*<sub>H-H</sub> = 9.5 Hz, 1H), 5.99 (s, 1H), 3.74-3.72 (m, 4H), 3.34 (s, 3H), 3.31-3.09 (m, 2H), 2.97-2.95 (m, 4H), 1.64 (s, 3H). <sup>13</sup>C NMR (126 MHz, DMSO-*d*<sub>6</sub>)  $\delta$ : 172.2 (C=O), 161.3 (t, *J*<sub>F-C</sub> = 256.0 Hz, C=O), 161.0 (C=O), 154.3 (d, *J*<sub>F-C</sub> = 243.7 Hz), 151.8, 148.9, 137.4, 136.9 (d, *J*<sub>F-C</sub> = 8.5 Hz), 132.7, 132.1 (d, *J*<sub>F-C</sub> = 10.7 Hz), 123.0, 119.1 (d, *J*<sub>F-C</sub> = 3.8 Hz), 117.0 (t, *J*<sub>F-C</sub> = 251.0 Hz), 116.9, 115.1, 109.1, 108.9 (d, *J*<sub>F-C</sub> = 15.2 Hz), 92.9, 66.6, 51.0 (d, *J*<sub>F-C</sub> = 2.6 Hz), 45.0 (t, *J*<sub>F-C</sub> = 22.6 Hz), 43.2 (d, *J*<sub>F-C</sub> = 3.3 Hz), 31.8, 30.0. <sup>19</sup>F NMR (471 MHz, DMSO-*d*<sub>6</sub>)  $\delta$ : -97.2 (d, *J*<sub>F-C</sub> = 256.6 Hz, 1F), -103.0 (d, *J*<sub>F-C</sub> = 256.6 Hz, 1F), -121.5 (s, 1F). HR MS (ESI) *m/z*: calcd for C<sub>26</sub>H<sub>25</sub>F<sub>3</sub>N<sub>3</sub>O<sub>5</sub> [M + H]<sup>+</sup> 516.1741, found 516.1734.

## 2 Gram scale experiment and natural sunlight experiment

### 2.1 Gram scale experiment

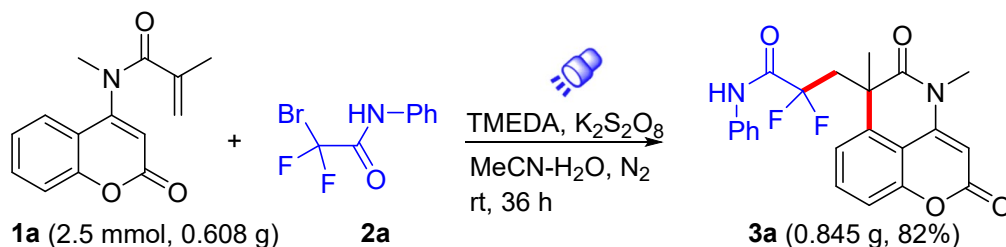

A Schlenk-flask equipped with a magnetic stir bar was charged with *N*-methyl-*N*-(2-oxo-2*H*-chromen-4-yl)methacrylamide **1a** (2.5 mmol, 0.608 g), BrCF<sub>2</sub>CONHPh **2a** (5.0 mmol, 1.245 g), K<sub>2</sub>S<sub>2</sub>O<sub>8</sub> (5.0 mmol, 1.350 g), TMEDA (5.0 mmol, 0.580 g) and MeCN-H<sub>2</sub>O (60 mL, v/v, 2:1). The flask was stirred under the irradiation of 10 W blue LEDs (430 nm) at room temperature under N<sub>2</sub> atmosphere. After 36 hours, the mixture was transferred into a 250 mL separating funnel which contained 80 mL saturated sodium chloride solution. The mixture was extracted with ethyl acetate (80 mL × 2). The combined organic phase was dried over anhydrous Na<sub>2</sub>SO<sub>4</sub> and concentrated under vacuum. The residue was purified by flash column chromatography using a mixture of ethyl acetate /petroleum ether as eluent to give the desired product **3a** (0.845 g, 82%).

### 2.2 Natural sunlight experiment

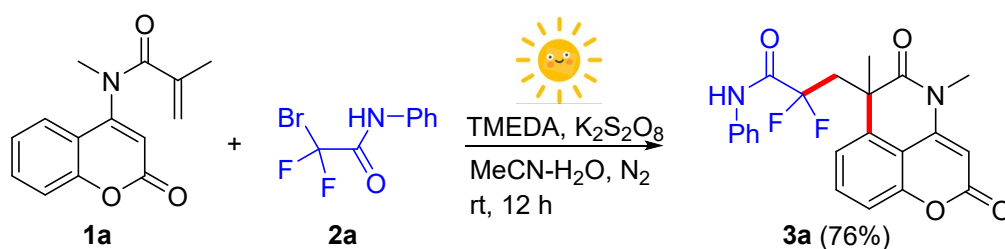

A Schlenk-tube was charged with *N*-methyl-*N*-(2-oxo-2*H*-chromen-4-yl)methacrylamide **1a** (0.2 mmol, 48.6 mg), BrCF<sub>2</sub>CONHPh **2a** (0.4 mmol, 99.6 mg), K<sub>2</sub>S<sub>2</sub>O<sub>8</sub> (0.4 mmol, 108 mg), TMEDA (0.4 mmol, 46.4 mg) and MeCN-H<sub>2</sub>O (3 mL, v/v, 2:1). The tube was stirred under the irradiation of natural sunlight at room temperature under N<sub>2</sub> atmosphere. After 12 hours, the mixture was transferred into a 100 mL separating funnel which contained 20 mL saturated sodium chloride solution. The mixture was extracted with ethyl acetate (10 mL × 2). The combined organic phase

was dried over anhydrous  $\text{Na}_2\text{SO}_4$  and concentrated under vacuum. The residue was purified by flash column chromatography using a mixture of ethyl acetate /petroleum ether as eluent to give the desired product **3a** (62.6 mg, 76%).

### 3 Mechanistic study

#### 3.1 UV-vis spectroscopic measurement

UV-vis spectra were performed on UV visible spectrophotometer (recorded in 1 cm path quartz cuvettes using TU-1901 Visible spectrophotometer)

Solution 1:  $\text{BrCF}_2\text{CONHPh}$  **2a** ( $1 \times 10^{-4}$  M) in MeCN (3 mL)

Solution 2:  $\text{K}_2\text{S}_2\text{O}_8$  ( $1 \times 10^{-4}$  M) in MeCN (3 mL)

Solution 3: TMEDA ( $1 \times 10^{-4}$  M) in MeCN (3 mL)

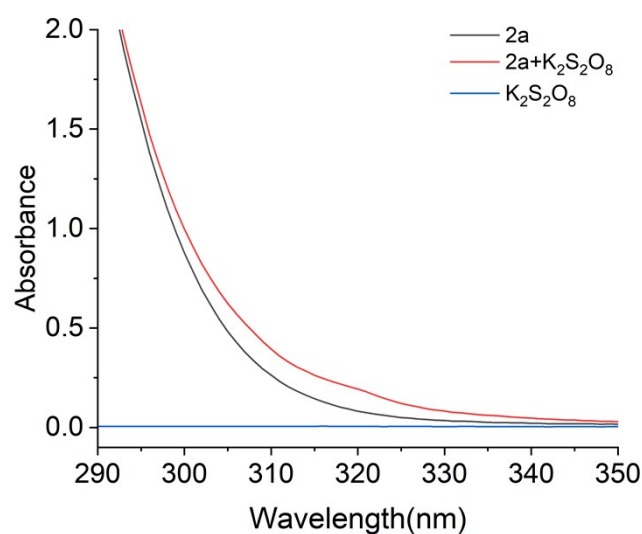

**Fig. S1** Absorption spectra of **2a** ( $1 \times 10^{-4}$  M),  $\text{K}_2\text{S}_2\text{O}_8$  ( $1 \times 10^{-4}$  M) and **2a** ( $1 \times 10^{-4}$  M)-  $\text{K}_2\text{S}_2\text{O}_8$  ( $1 \times 10^{-4}$  M) in MeCN

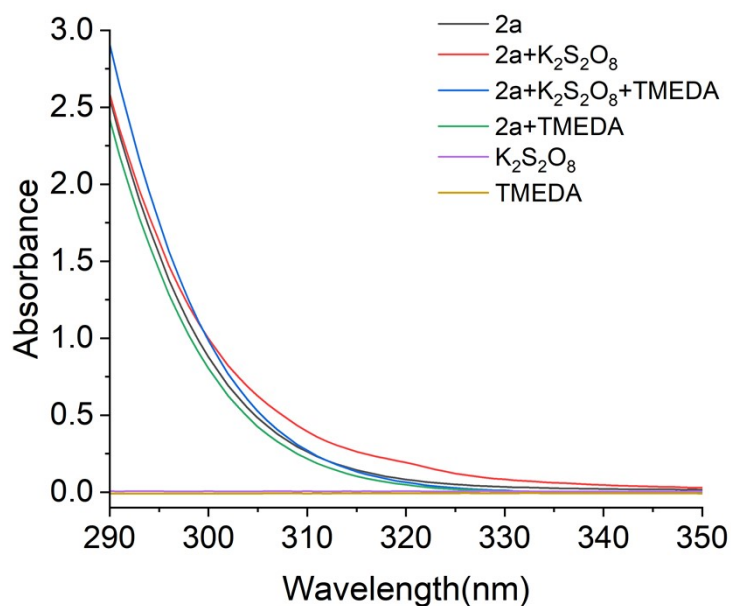

**Fig. S2** Absorption spectra of **2a** ( $1 \times 10^{-4}$  M), TMEDA ( $1 \times 10^{-4}$  M),  $K_2S_2O_8$  ( $1 \times 10^{-4}$  M), **2a** ( $1 \times 10^{-4}$  M)- $K_2S_2O_8$  ( $1 \times 10^{-4}$  M), **2a** ( $1 \times 10^{-4}$  M)-TMEDA ( $1 \times 10^{-4}$  M), and **2a** ( $1 \times 10^{-4}$  M)-  $K_2S_2O_8$  ( $1 \times 10^{-4}$  M)-TMEDA ( $1 \times 10^{-4}$  M) in MeCN

### 3.2 Light on/off experiment

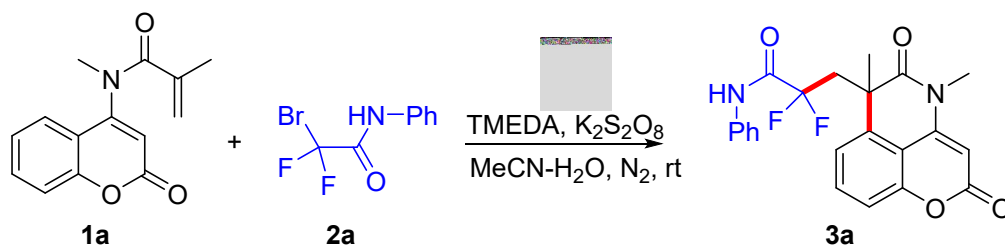

A Schlenk-tube was charged with *N*-methyl-*N*-(2-oxo-2*H*-chromen-4-yl)methacrylamide **1a** (0.2 mmol, 48.6 mg),  $BrCF_2CONHPh$  **2a** (0.4 mmol, 99.6 mg),  $K_2S_2O_8$  (0.4 mmol, 108 mg), TMEDA (0.4 mmol, 46.4 mg) and MeCN- $H_2O$  (3 mL, v/v, 2:1). The tube was stirred under the irradiation of 10 W blue LEDs (430 nm) at room temperature under  $N_2$  atmosphere, and the reaction was placed in light and dark in every alternative 1 h. The yield of product **3a** was determined by  $^{19}F$  NMR.

| Entry | Time (h) | Light source | Yield (%) |
|-------|----------|--------------|-----------|
| 1     | 2        | on           | 30        |
| 2     | 2        | off          | 30        |
| 3     | 2        | on           | 70        |
| 4     | 2        | off          | 70        |
| 5     | 2        | on           | 90        |
| 6     | 2        | off          | 90        |

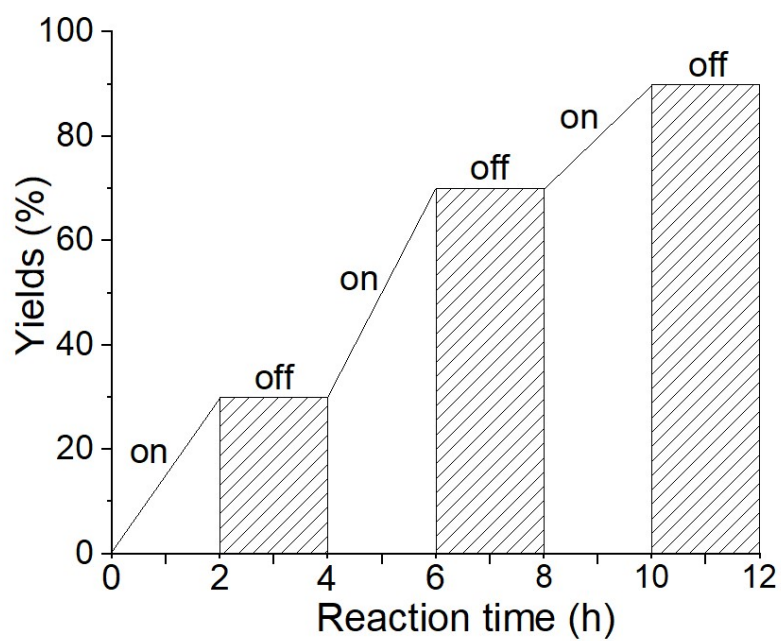

**Fig. S3** Visible light irradiation on/off experiment

### 3.3 HR MS spectra of the adducts

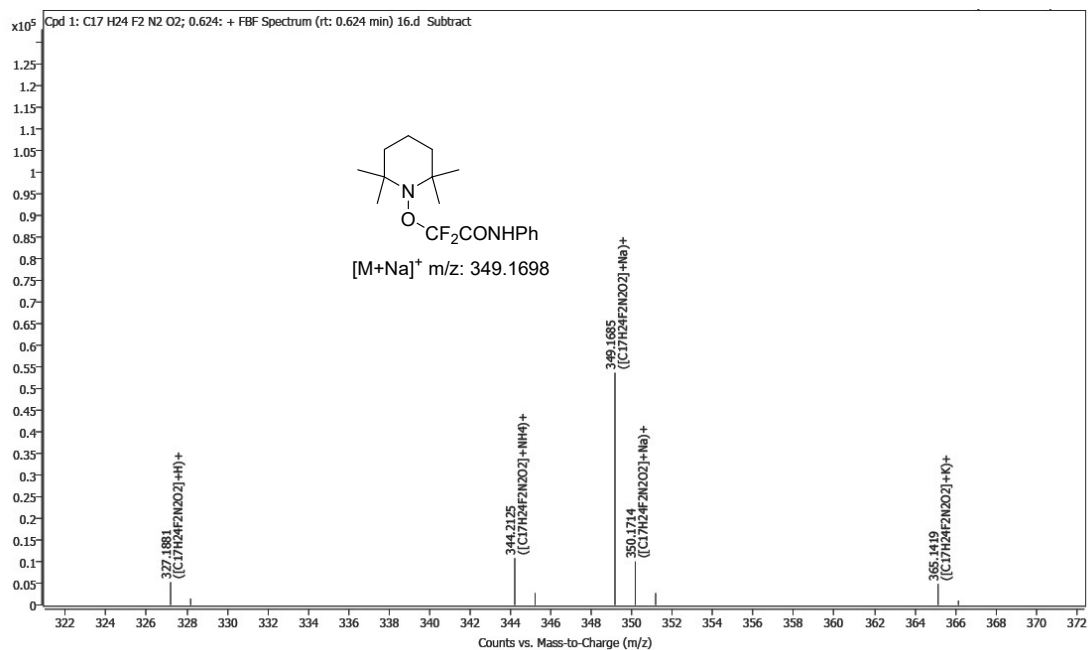

Fig. S4 HR MS spectrum of the adduct TEMPO-CF<sub>2</sub>CONHPh (9)

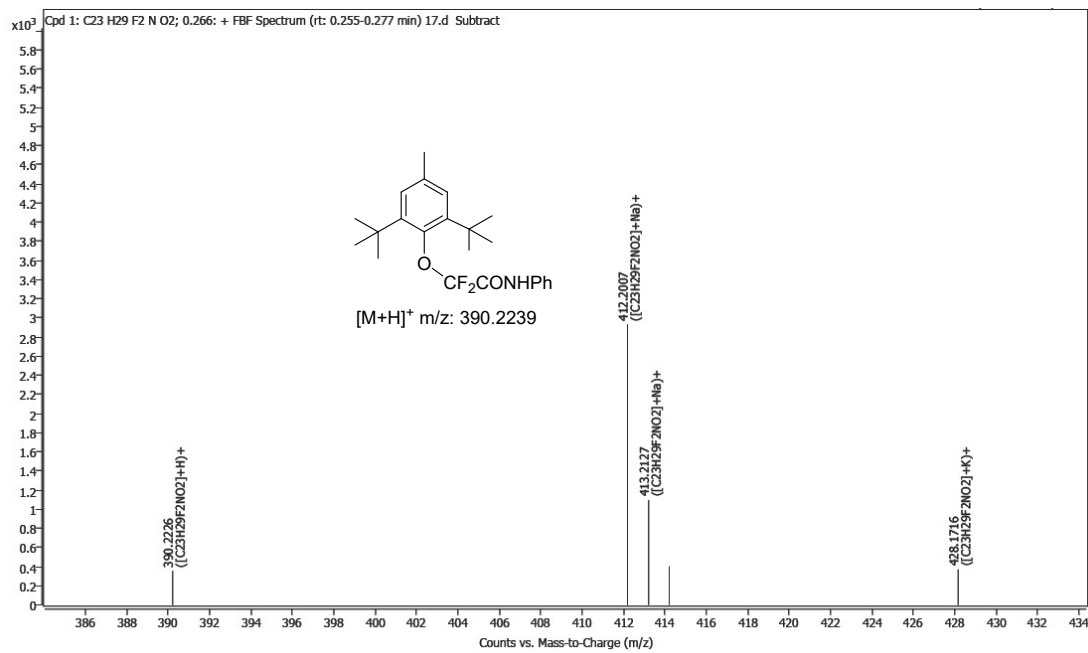

Fig. S5 HR MS spectrum of the adduct BHT-CF<sub>2</sub>CONHPh (10)

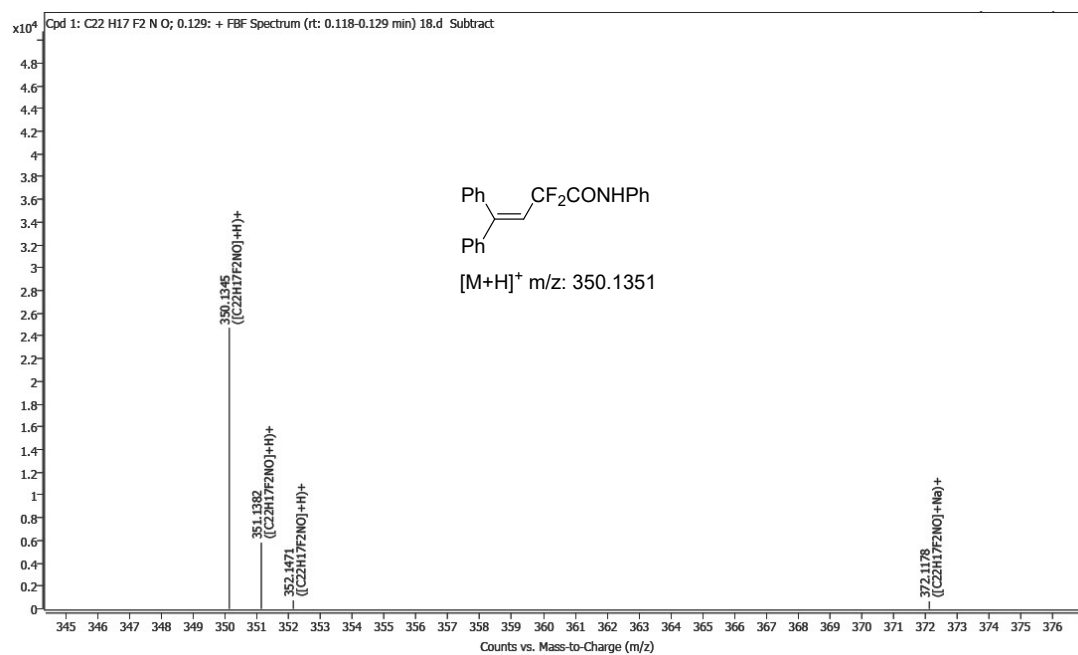

**Fig. S6** HR MS spectrum of the adduct DPE- $\text{CF}_2\text{CONHPh}$  (**11**)

### 3.4 Stern-Volmer quenching experiments

#### (a) Fluorescence quenching

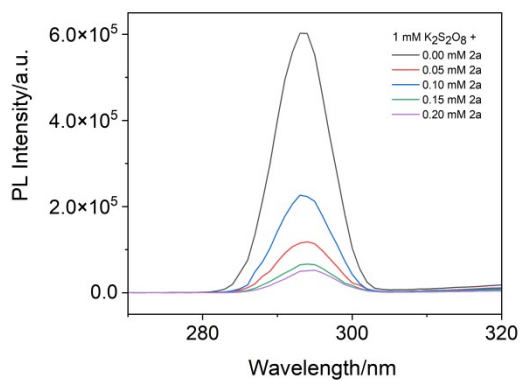

#### (b) Stern-Volmer plots

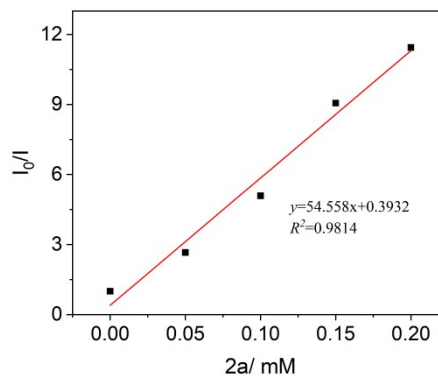

**Figure. S7** (a) Fluorescence quenching of  $K_2S_2O_8$  by bromodifluoroacetamide in  $CH_3CN/H_2O(2:1)$ (left); (b) Stern-Volmer plots of  $K_2S_2O_8$  by bromodifluoroacetamide (right).

In addition, a typical fluorescence quenching experiment, in which the excitation peak intensity of  $K_2S_2O_8$  gradually decreased as the concentration of bromodifluoroacetamide 2a increased, indicates efficient quenching of  $K_2S_2O_8$  by bromodifluoroacetamide (Figure S7a, left). The linear correlation observed in the corresponding Stern-Volmer plot provided additional evidence for the EDA interaction of 2a with  $K_2S_2O_8$  (Figure S7b, right).

#### 4 Copies of spectra of desired products

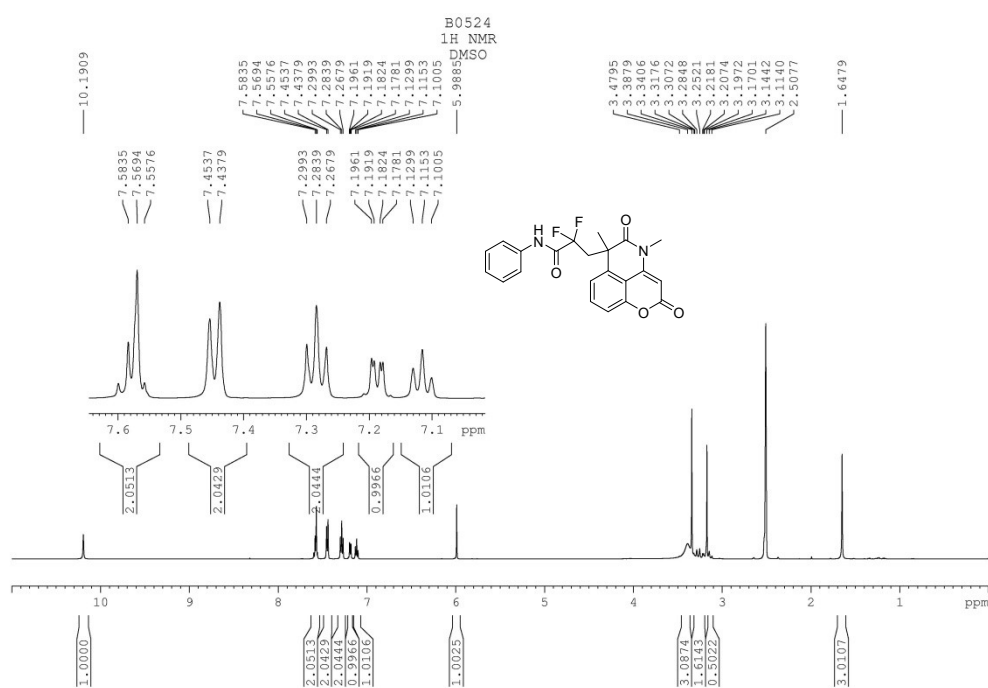

**Fig. S8**  $^1H$  NMR (500 MHz) spectrum of compound **3a**

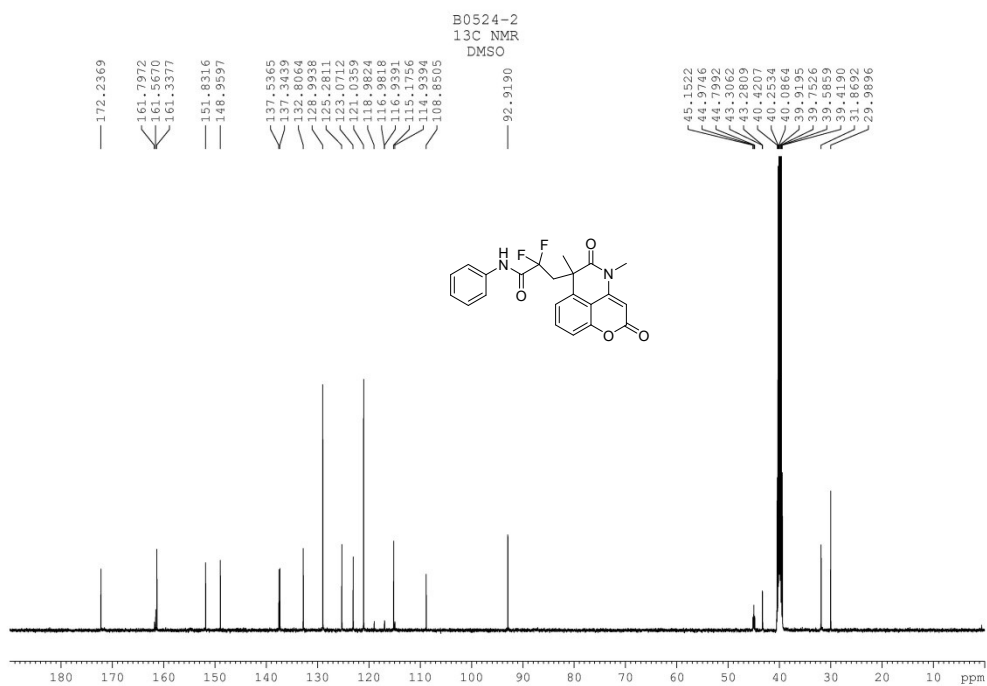

Fig. S9 <sup>13</sup>C NMR (126 MHz) spectrum of compound 3a

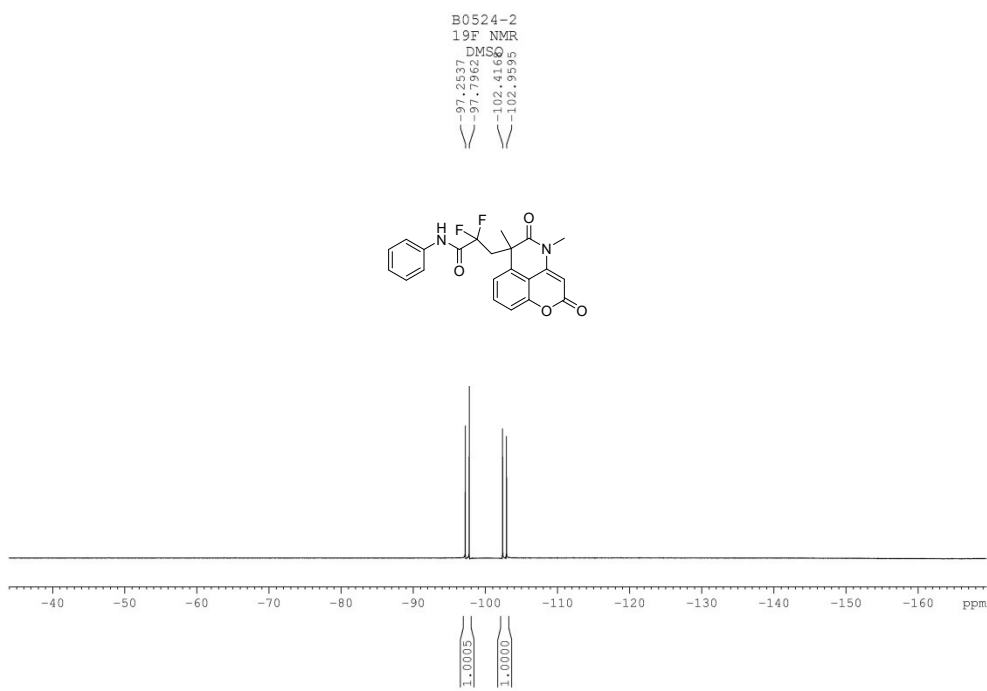

Fig. S10 <sup>19</sup>F NMR (471 MHz) spectrum of compound 3a

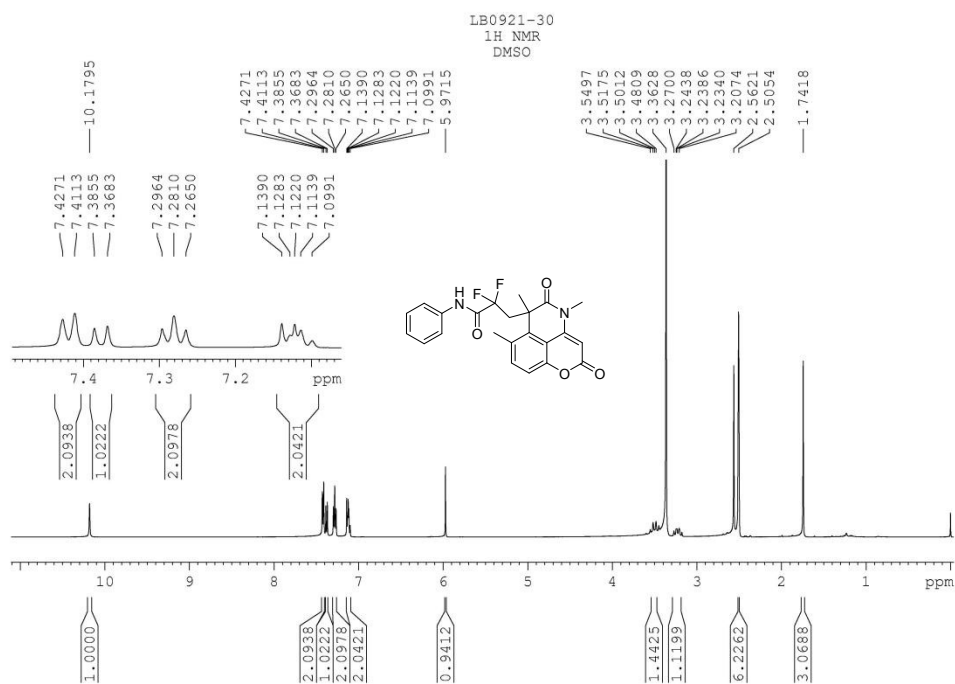

Fig. S11 <sup>1</sup>H NMR (500 MHz) spectrum of compound 3b

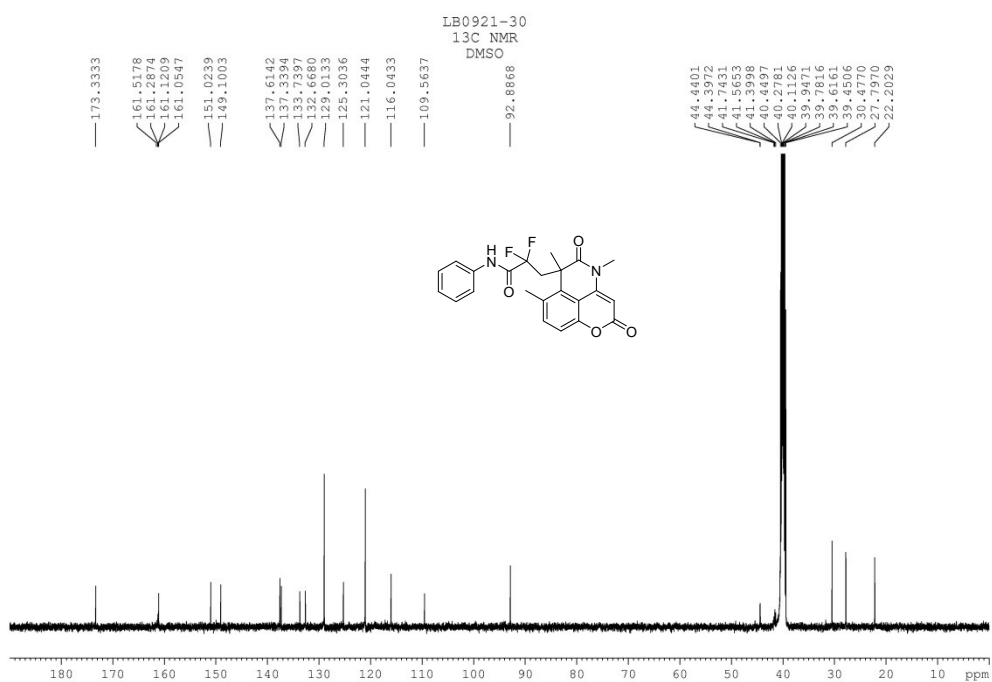

Fig. S12 <sup>13</sup>C NMR (126 MHz) spectrum of compound 3b

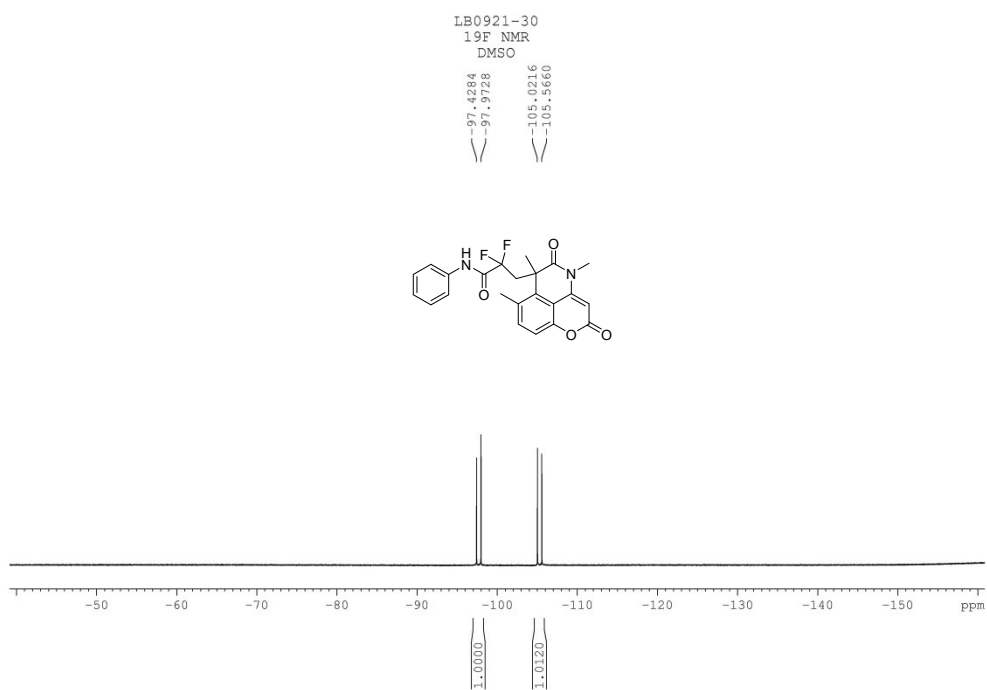

Fig. S13 <sup>19</sup>F NMR (471 MHz) spectrum of compound 3b

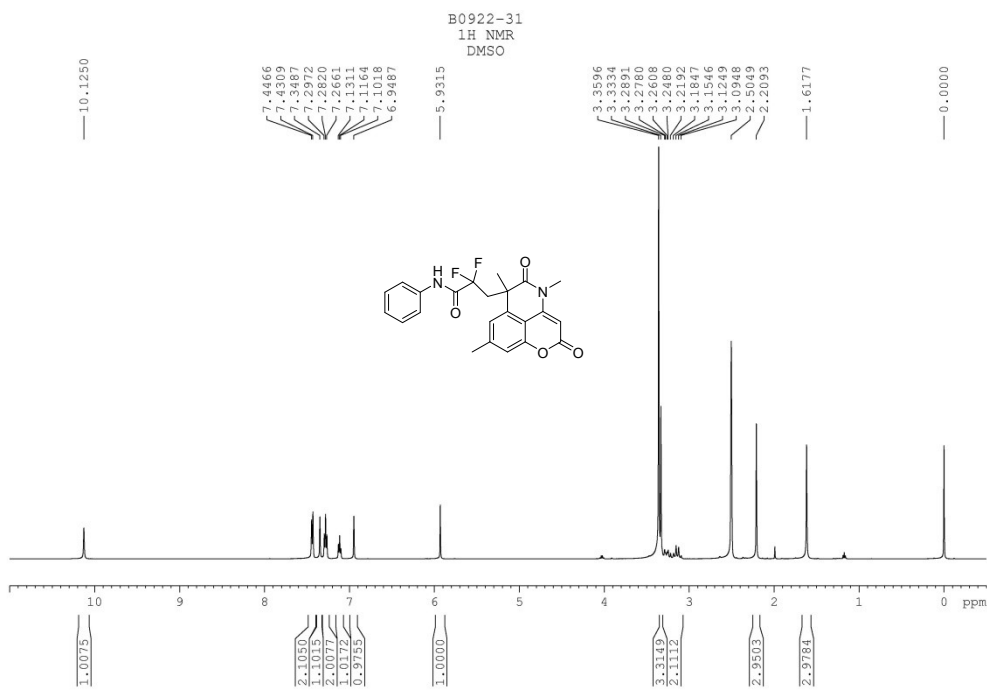

Fig. S14 <sup>1</sup>H NMR (500 MHz) spectrum of compound 3c

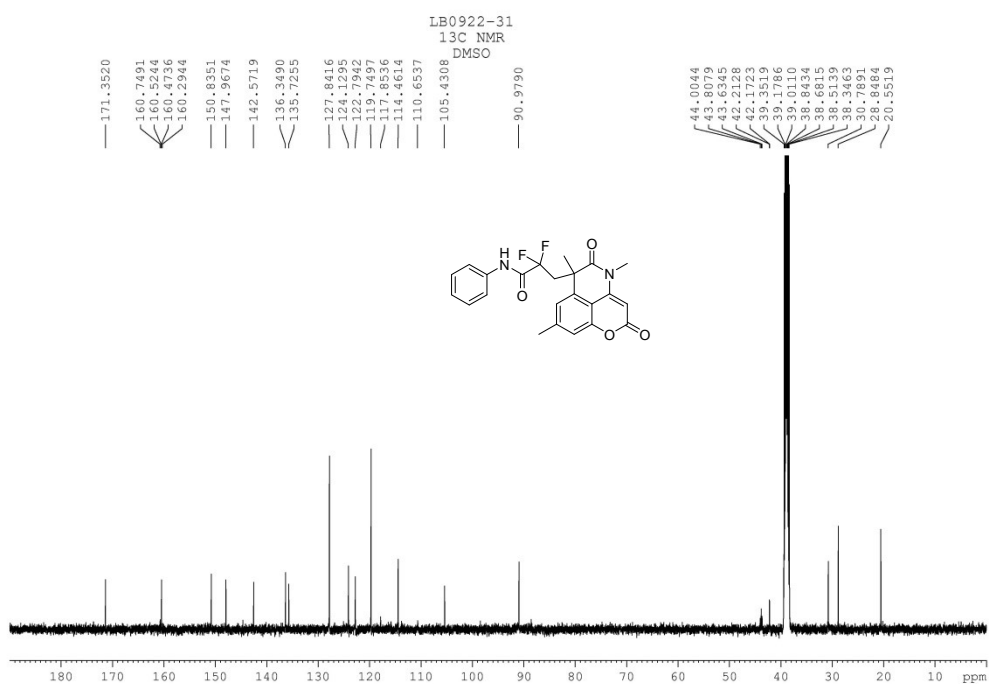

Fig. S15 <sup>13</sup>C NMR (126 MHz) spectrum of compound 3c

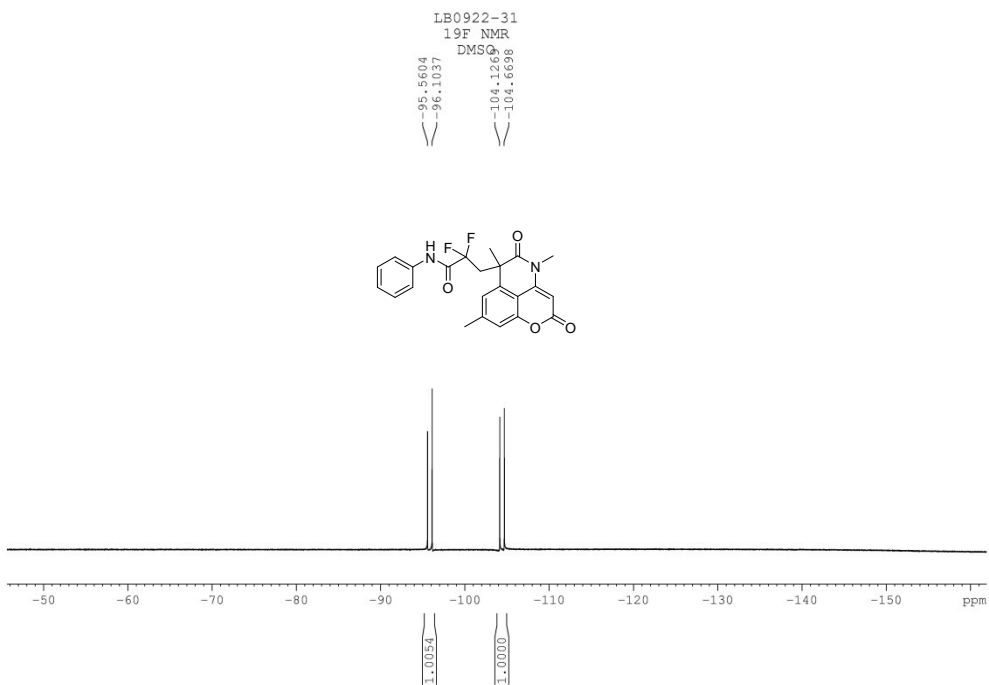

Fig. S16 <sup>19</sup>F NMR (471 MHz) spectrum of compound 3c

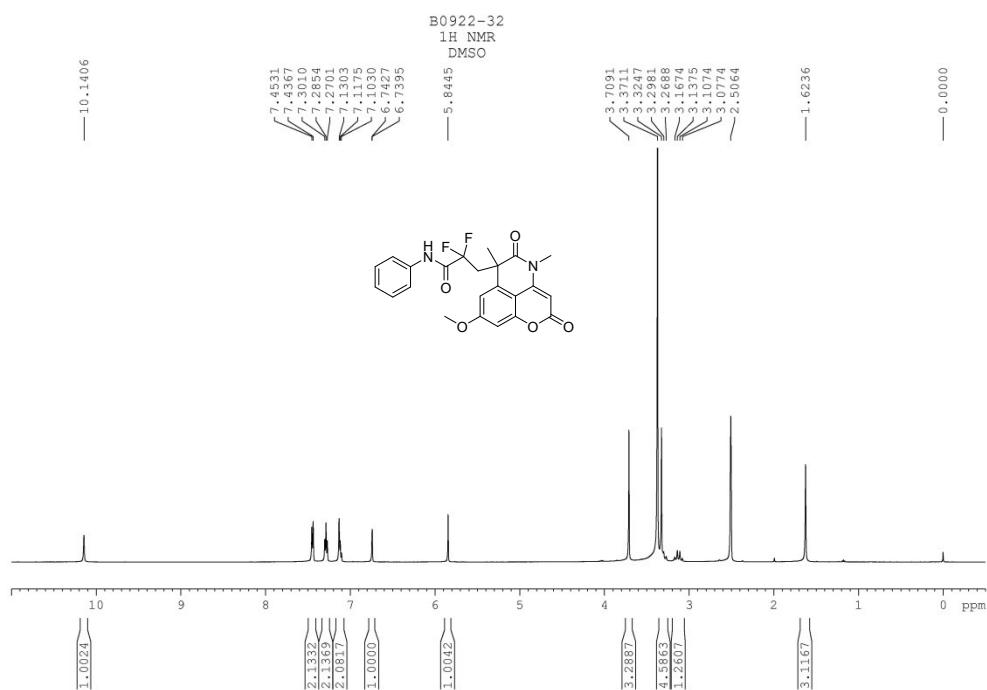

Fig. S17 <sup>1</sup>H NMR (500 MHz) spectrum of compound 3d

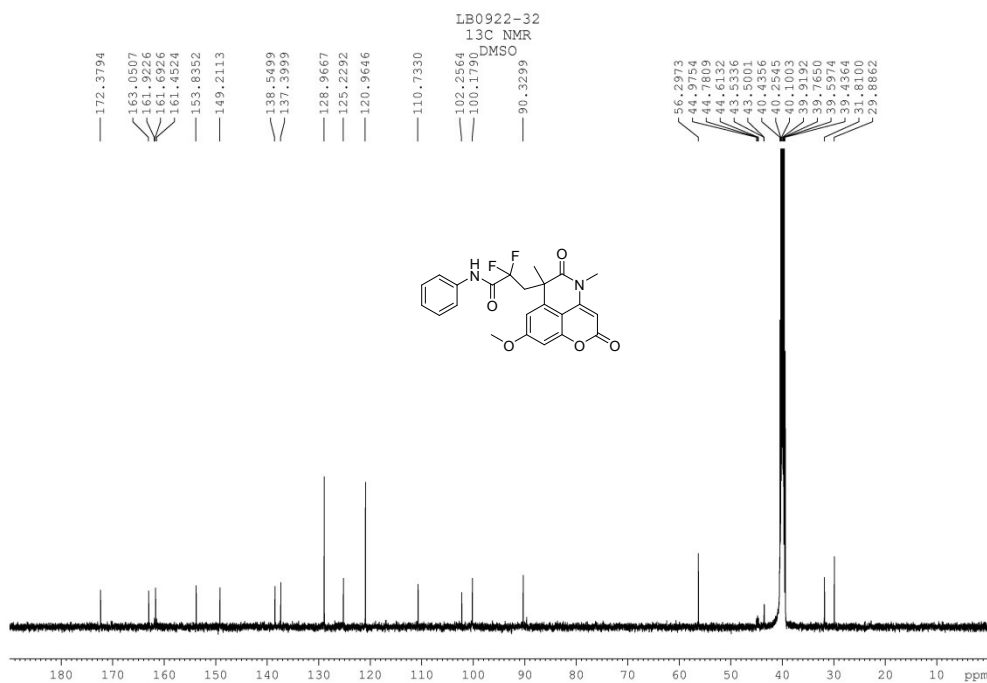

Fig. S18 <sup>13</sup>C NMR (126 MHz) spectrum of compound 3d

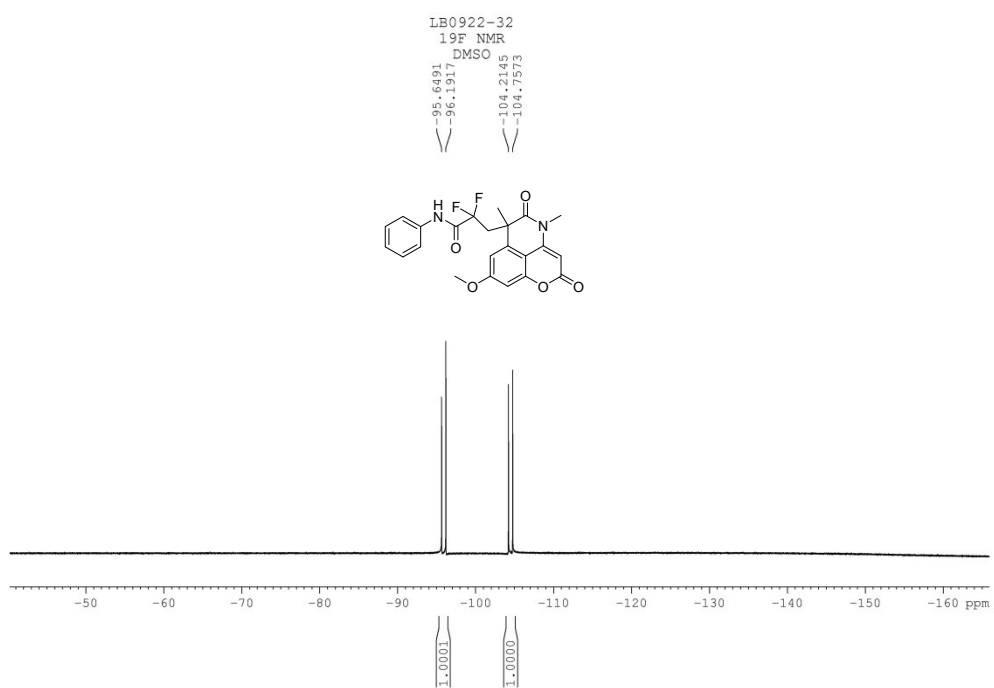

Fig. S19 <sup>19</sup>F NMR (471 MHz) spectrum of compound 3d

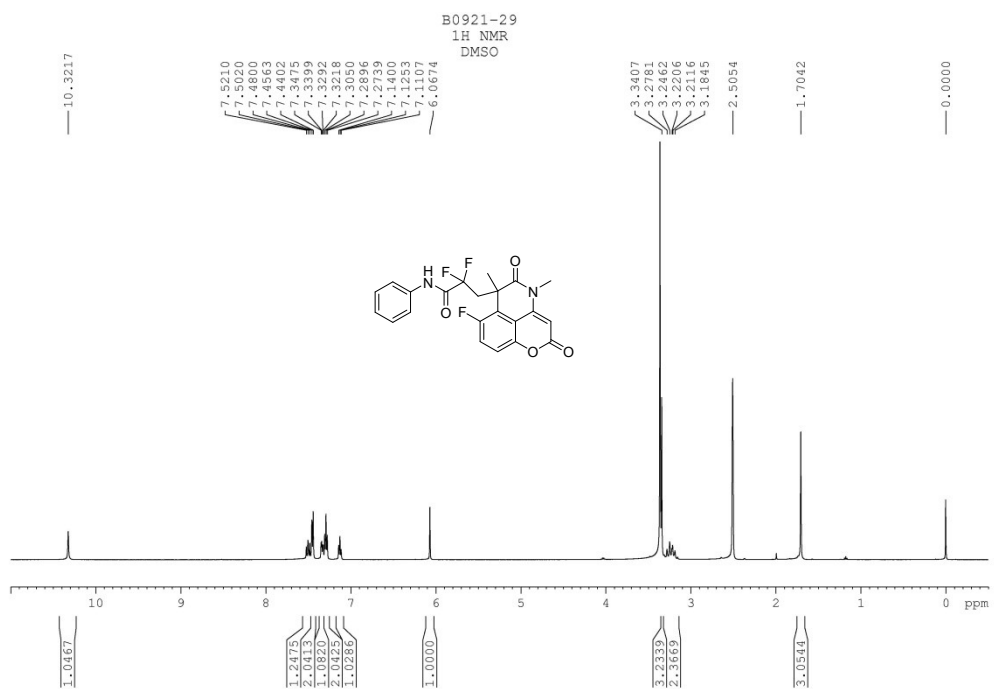

Fig. S20 <sup>1</sup>H NMR (500 MHz) spectrum of compound 3e

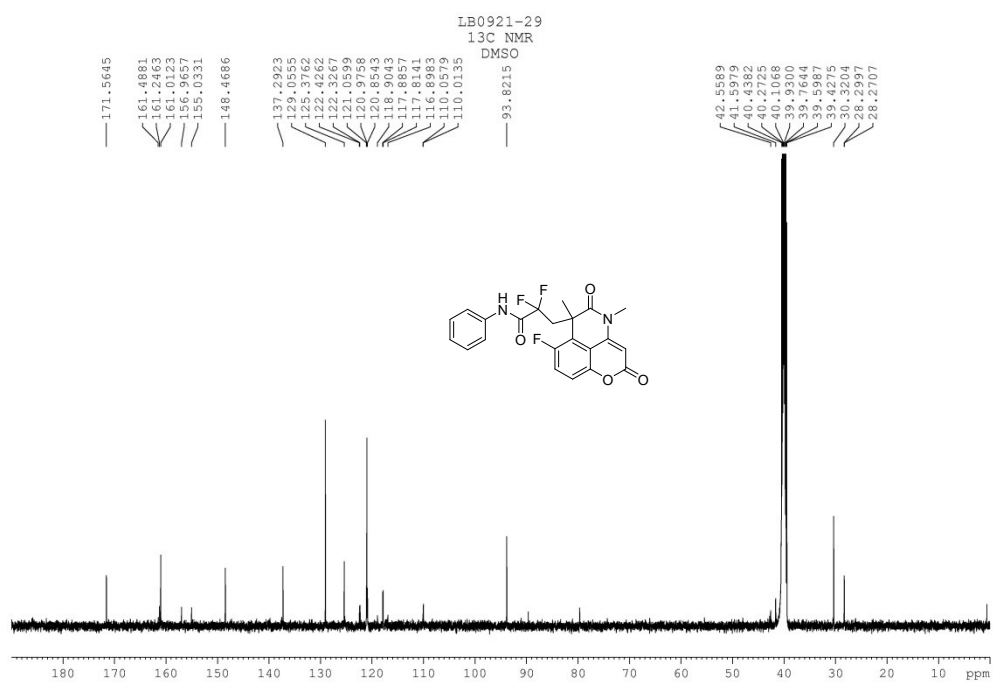

Fig. S21 <sup>13</sup>C NMR (126 MHz) spectrum of compound 3e

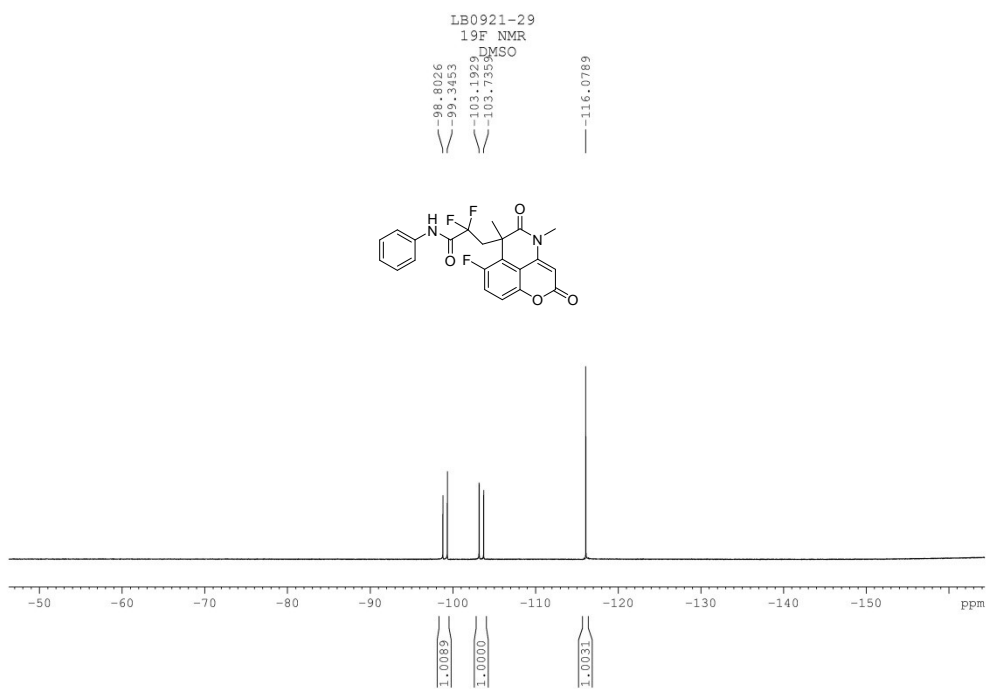

Fig. S22 <sup>19</sup>F NMR (471 MHz) spectrum of compound 3e



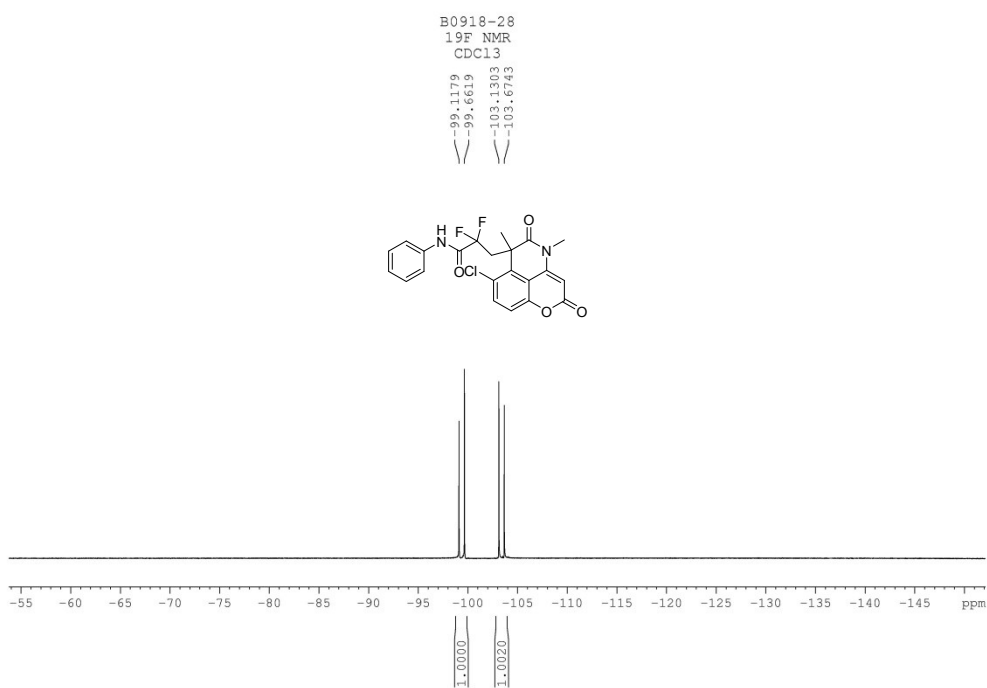

Fig. S25 <sup>19</sup>F NMR (471 MHz) spectrum of compound **3f**

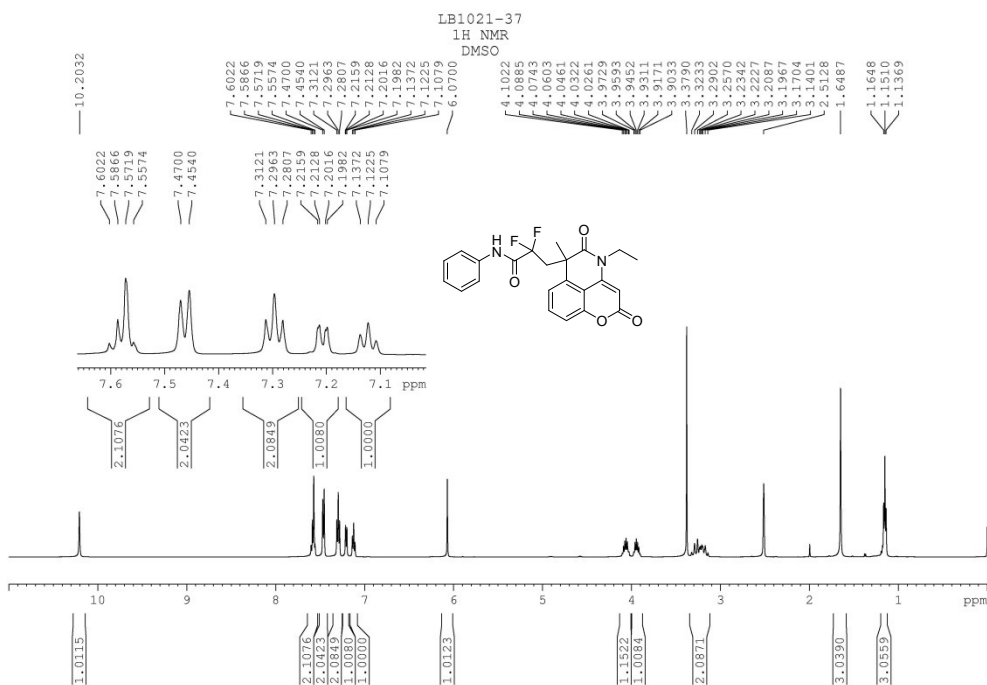

Fig. S26 <sup>1</sup>H NMR (500 MHz) spectrum of compound **3g**

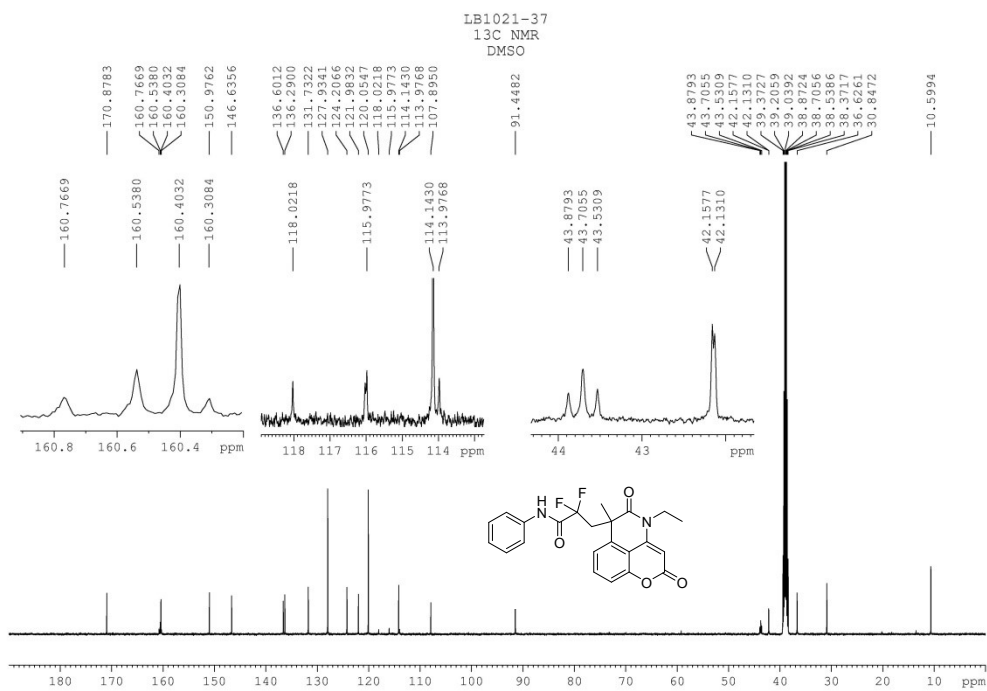

Fig. S27 <sup>13</sup>C NMR (126 MHz) spectrum of compound 3g

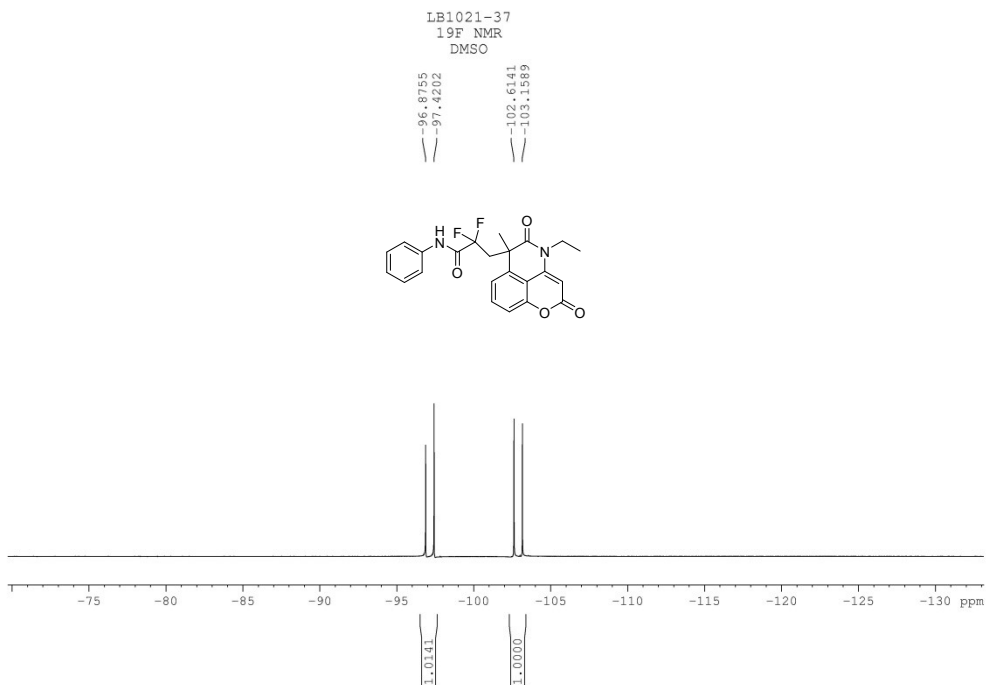

Fig. S28 <sup>19</sup>F NMR (471 MHz) spectrum of compound 3g

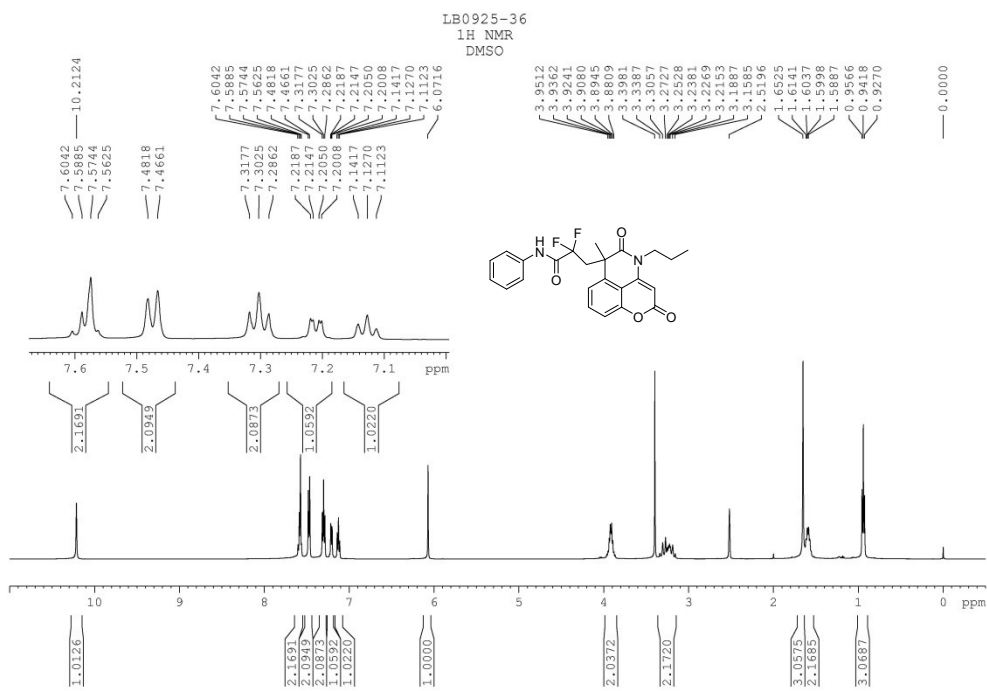

Fig. S29 <sup>1</sup>H NMR (500 MHz) spectrum of compound 3h

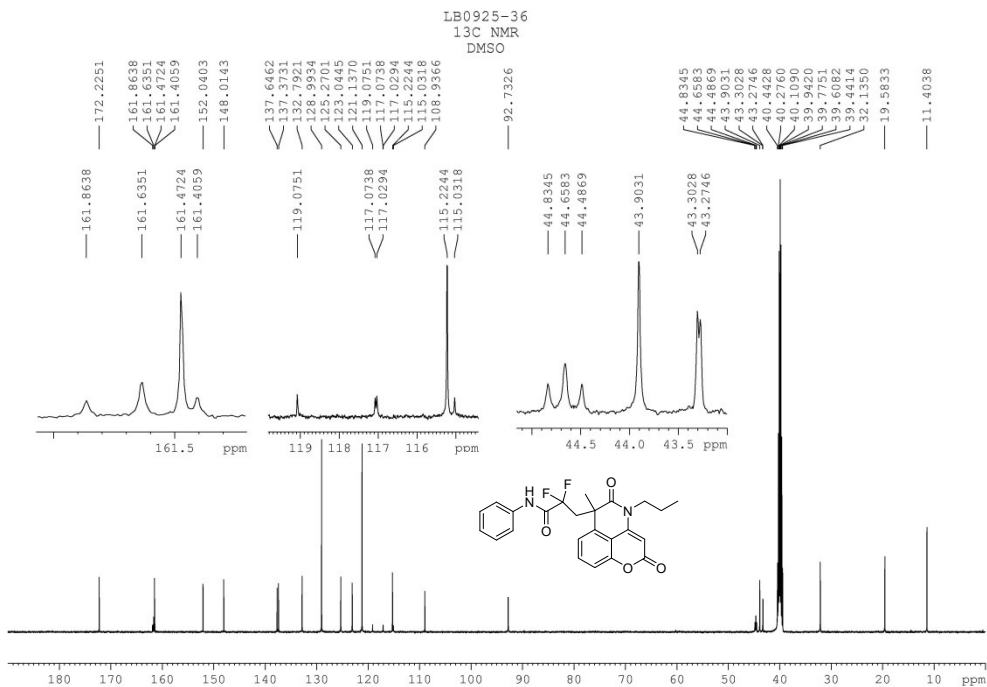

Fig. S30 <sup>13</sup>C NMR (126 MHz) spectrum of compound 3h

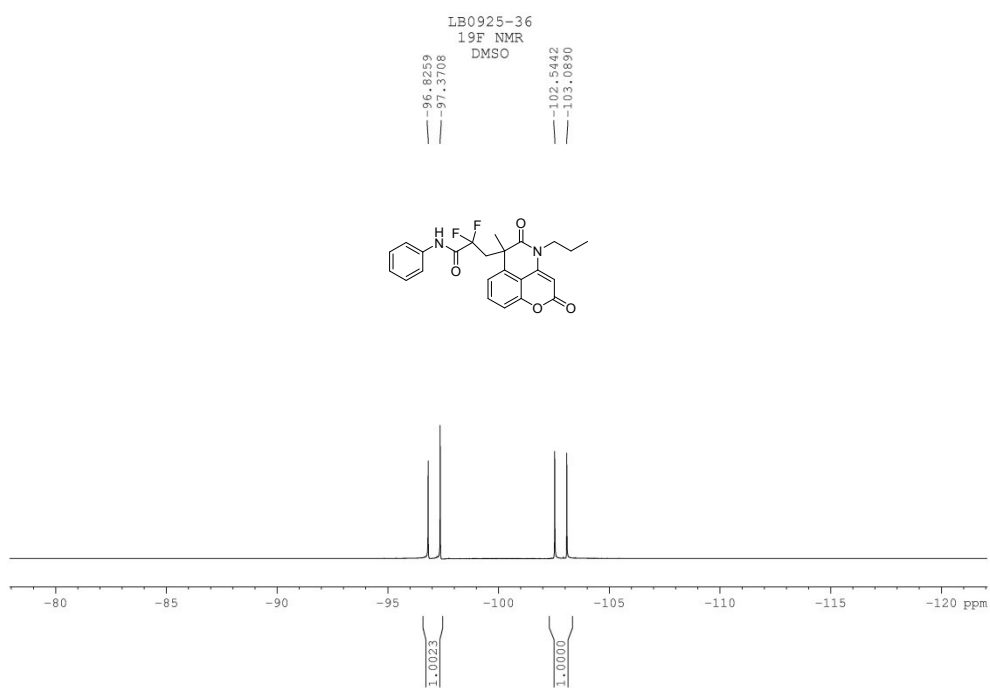

**Fig. S31** <sup>19</sup>F NMR (471 MHz) spectrum of compound **3h**

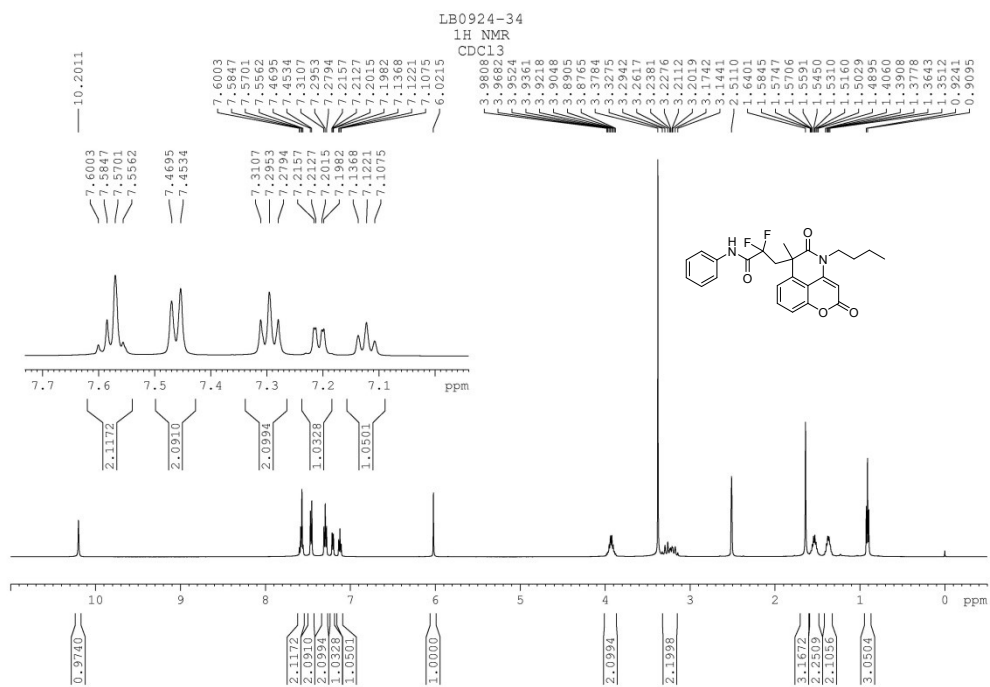

**Fig. S32** <sup>1</sup>H NMR (500 MHz) spectrum of compound **3i**

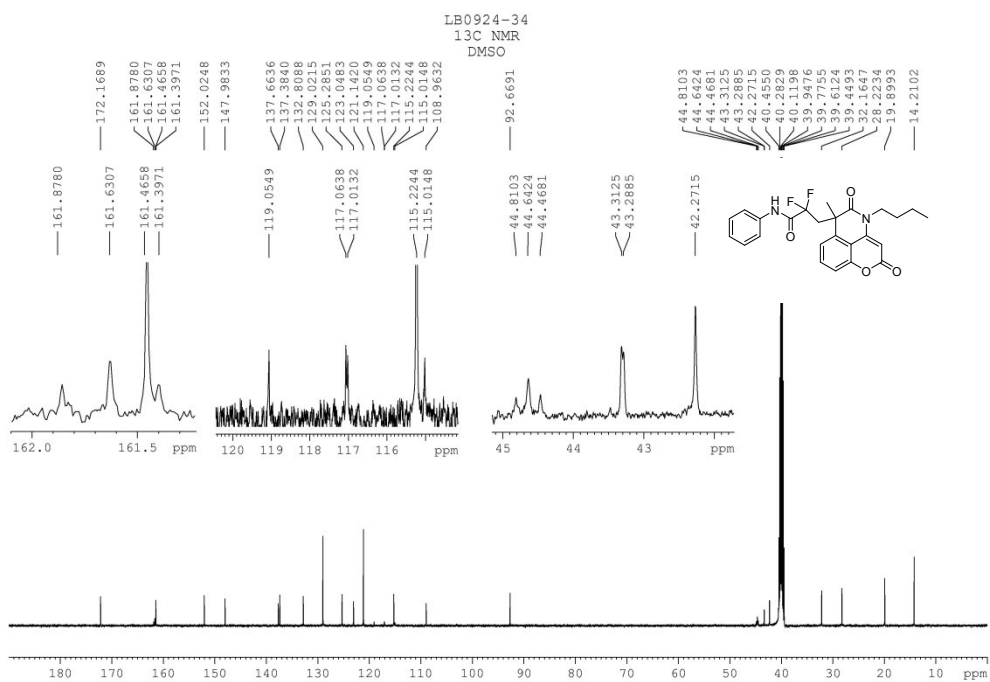

Fig. S33 <sup>13</sup>C NMR (126 MHz) spectrum of compound 3i

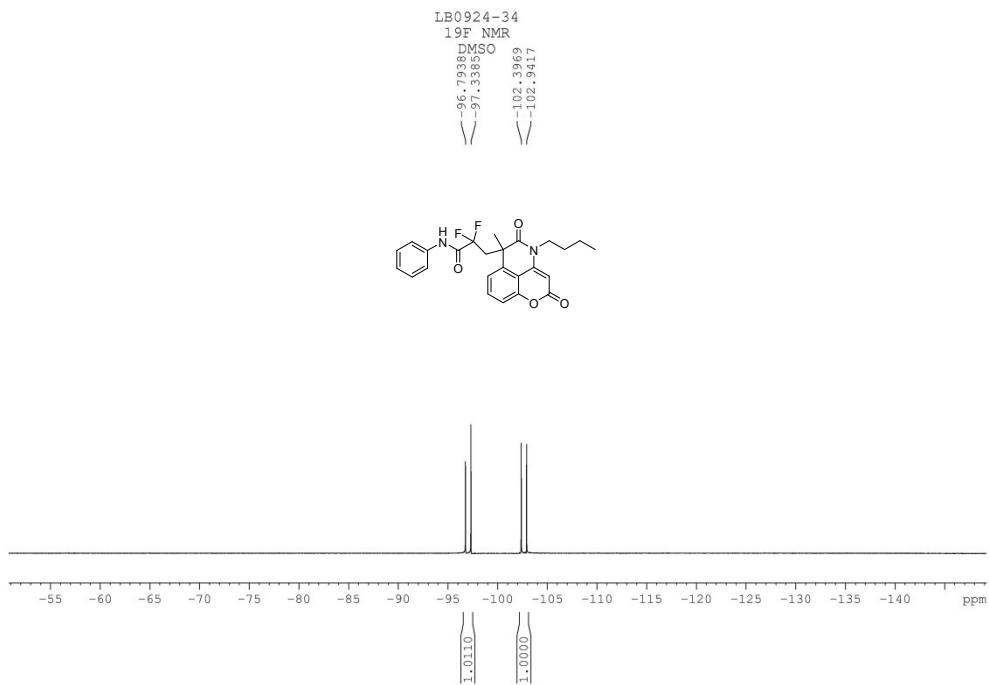

Fig. S34 <sup>19</sup>F NMR (471 MHz) spectrum of compound 3i

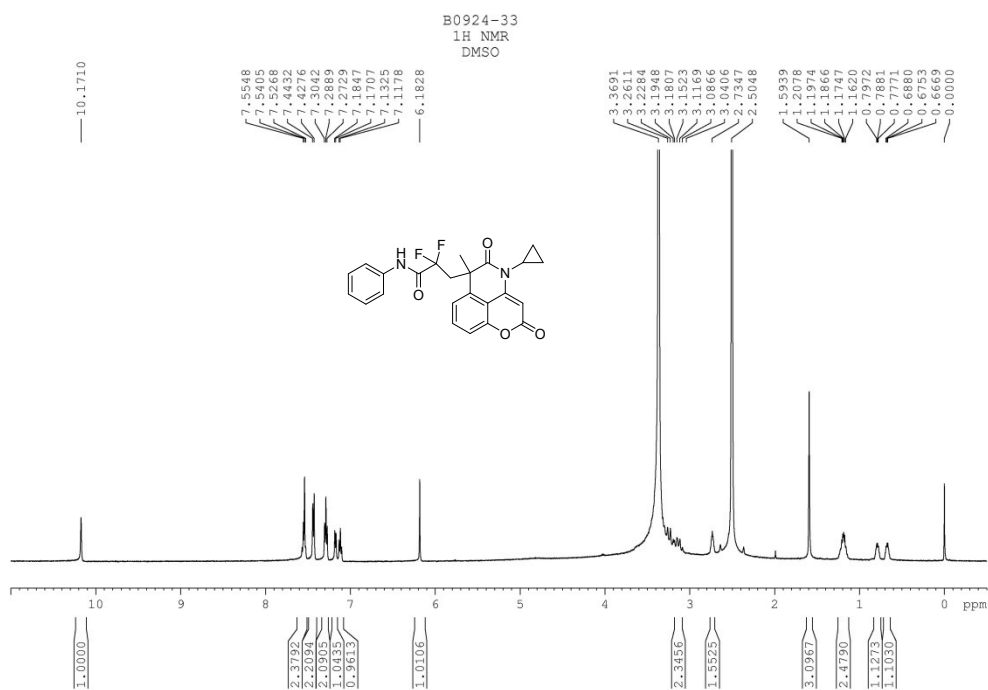

Fig. S35 <sup>1</sup>H NMR (500 MHz) spectrum of compound 3j

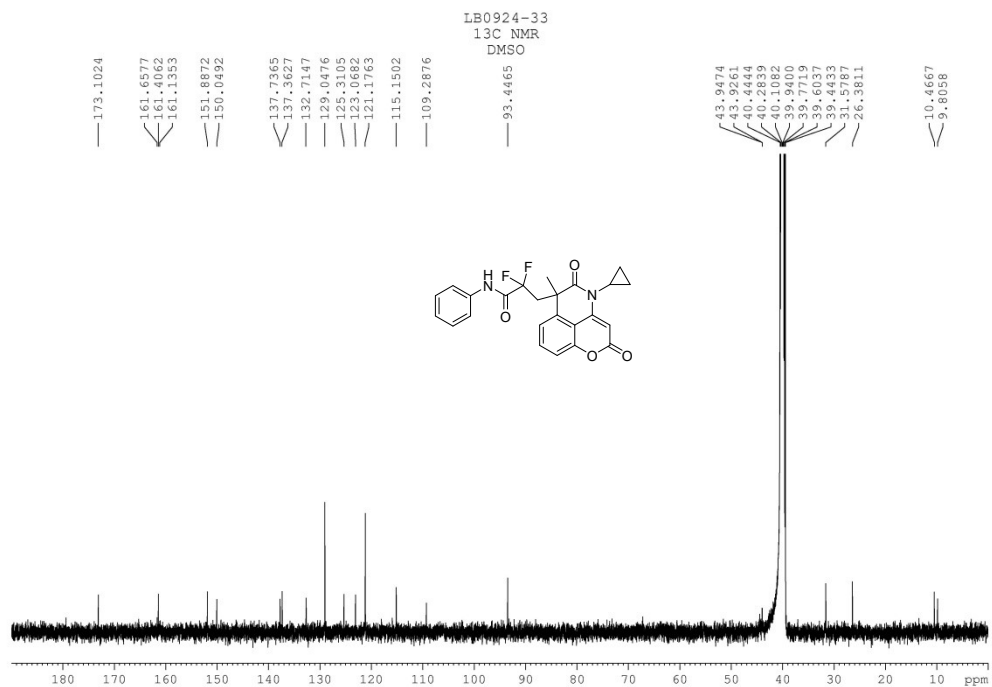

Fig. S36 <sup>13</sup>C NMR (126 MHz) spectrum of compound 3j

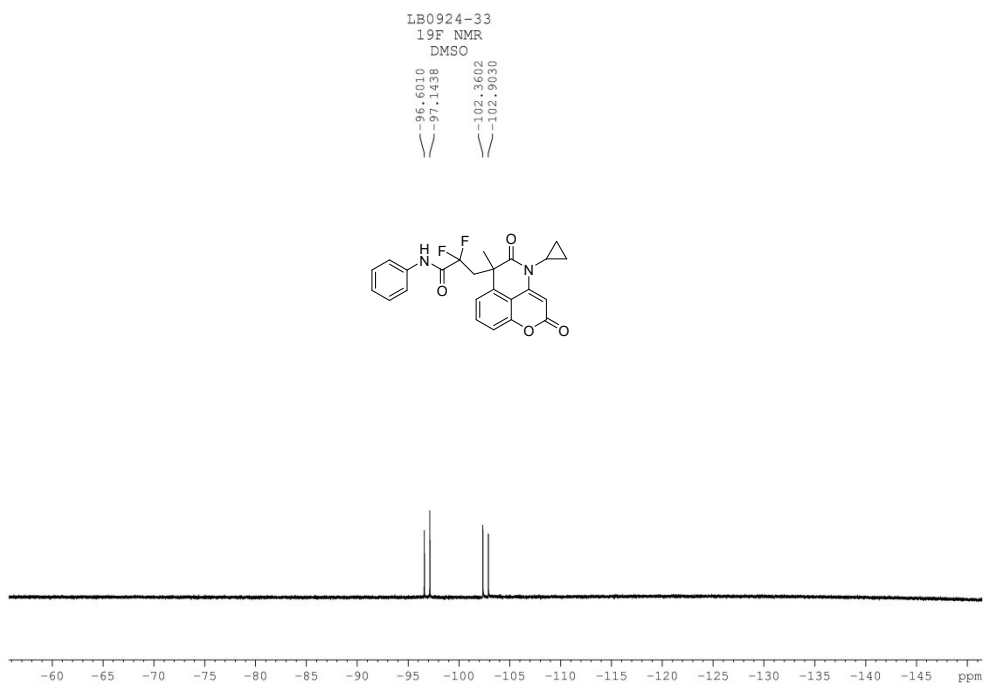

Fig. S37 <sup>19</sup>F NMR (471 MHz) spectrum of compound **3j**

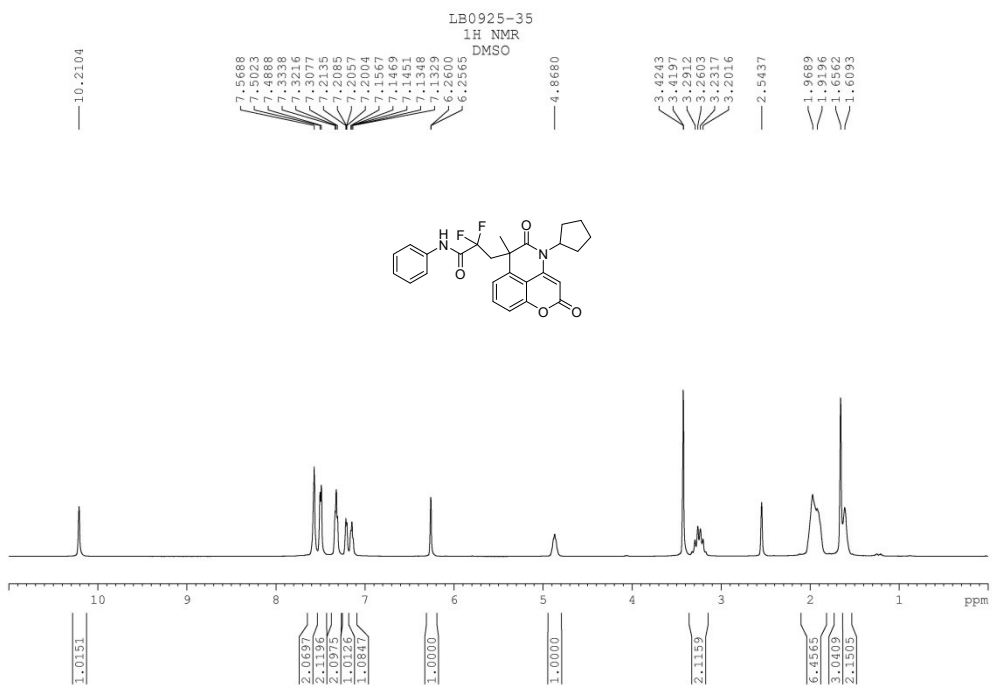

Fig. S38 <sup>1</sup>H NMR (500 MHz) spectrum of compound **3k**

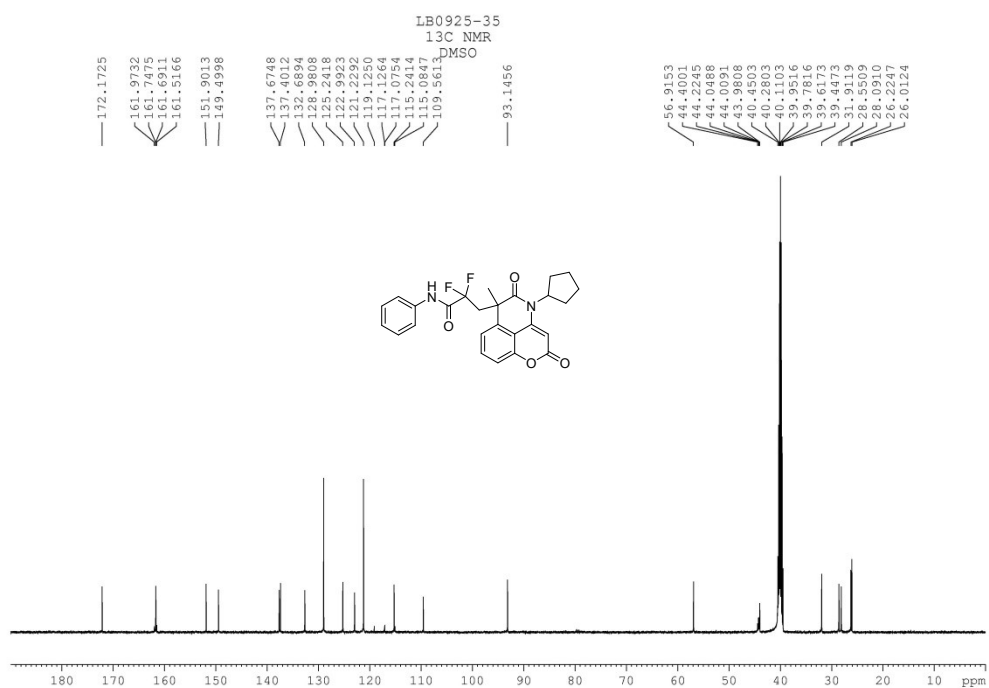

Fig. S39 <sup>13</sup>C NMR (126 MHz) spectrum of compound 3k

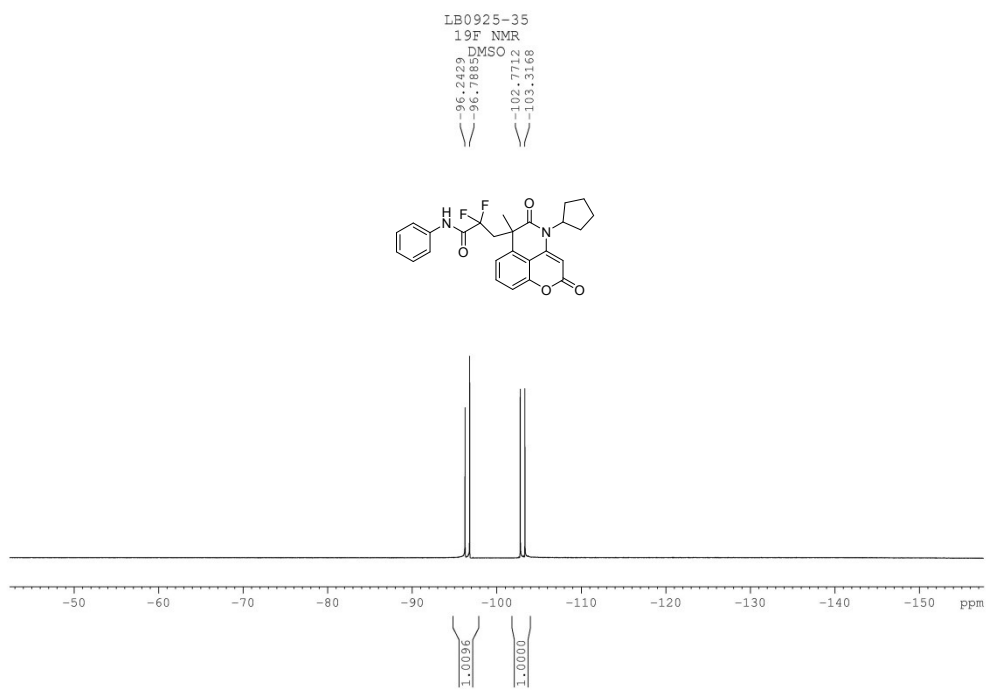

Fig. S40 <sup>19</sup>F NMR (471 MHz) spectrum of compound 3k

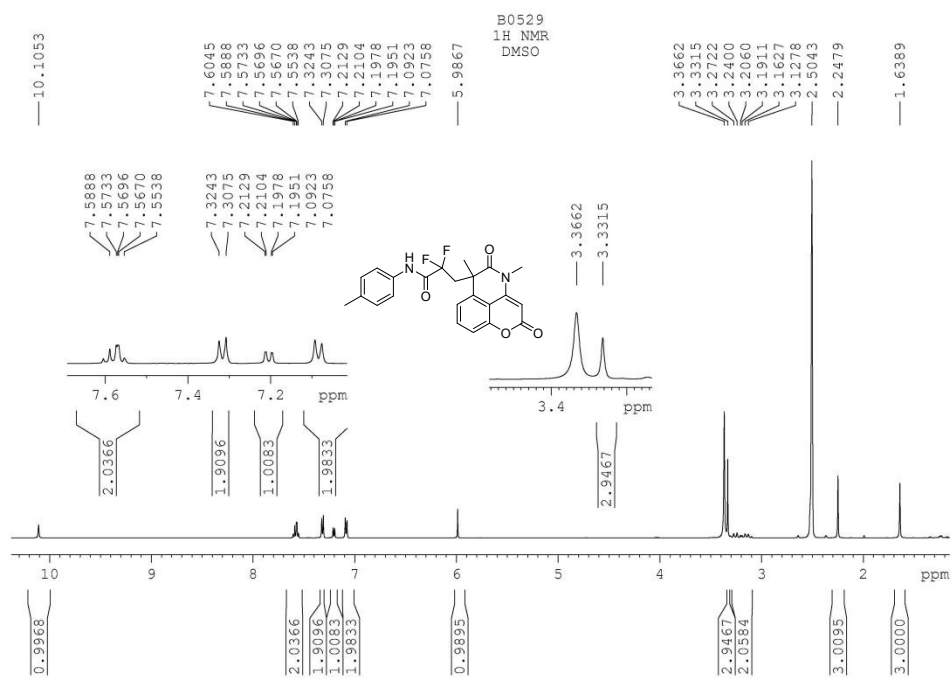

**Fig. S41**  $^1\text{H}$  NMR (500 MHz) spectrum of compound 4a

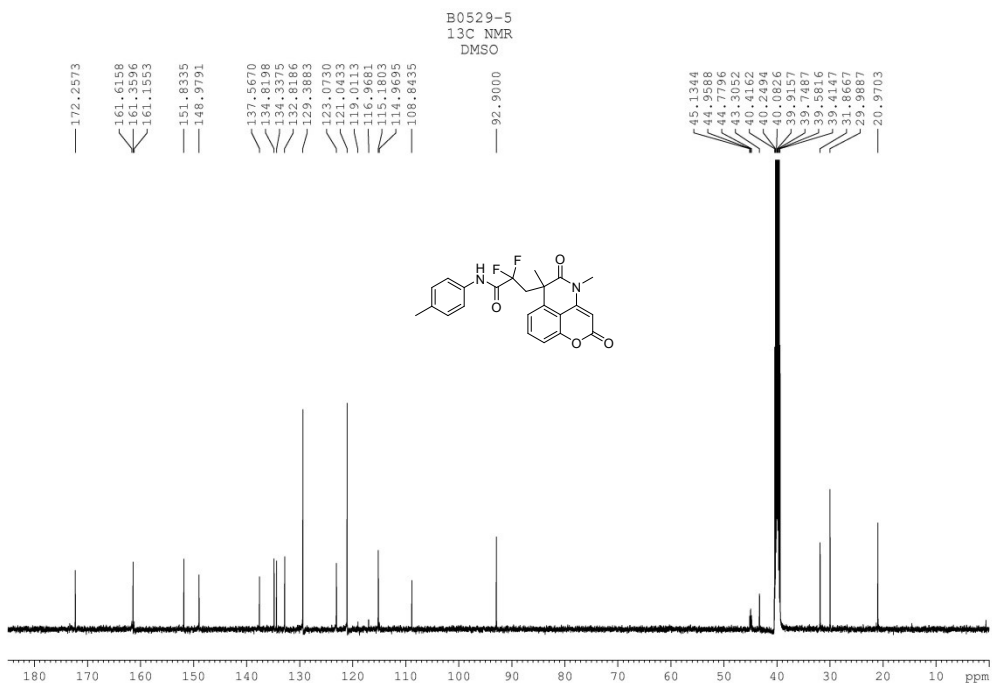

**Fig. S42**  $^{13}\text{C}$  NMR (126 MHz) spectrum of compound 4a

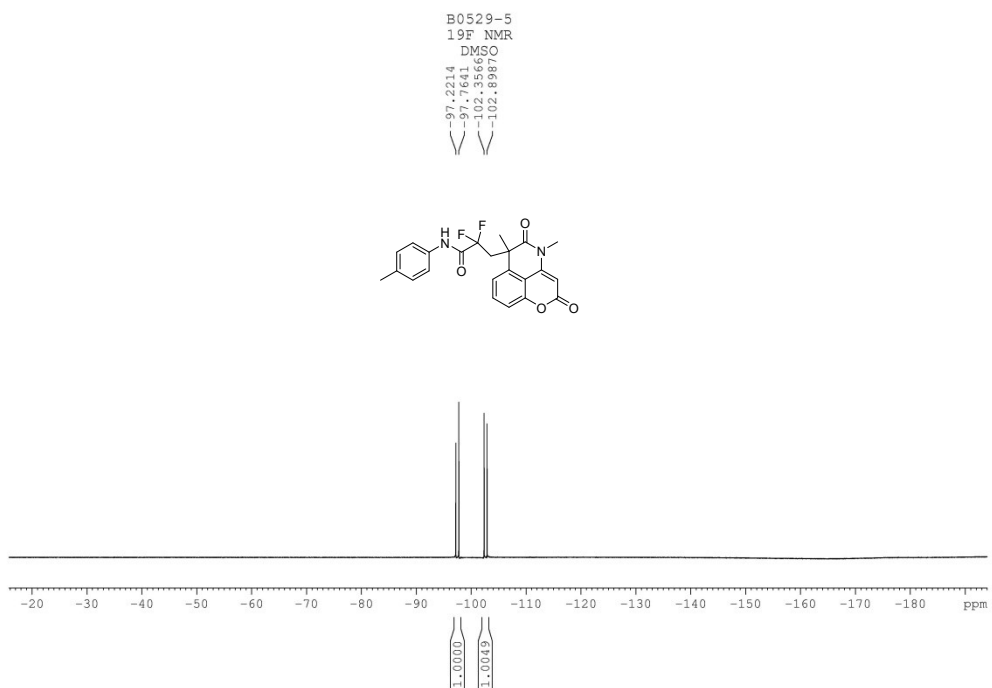

Fig. S43 <sup>19</sup>F NMR (471 MHz) spectrum of compound 4a

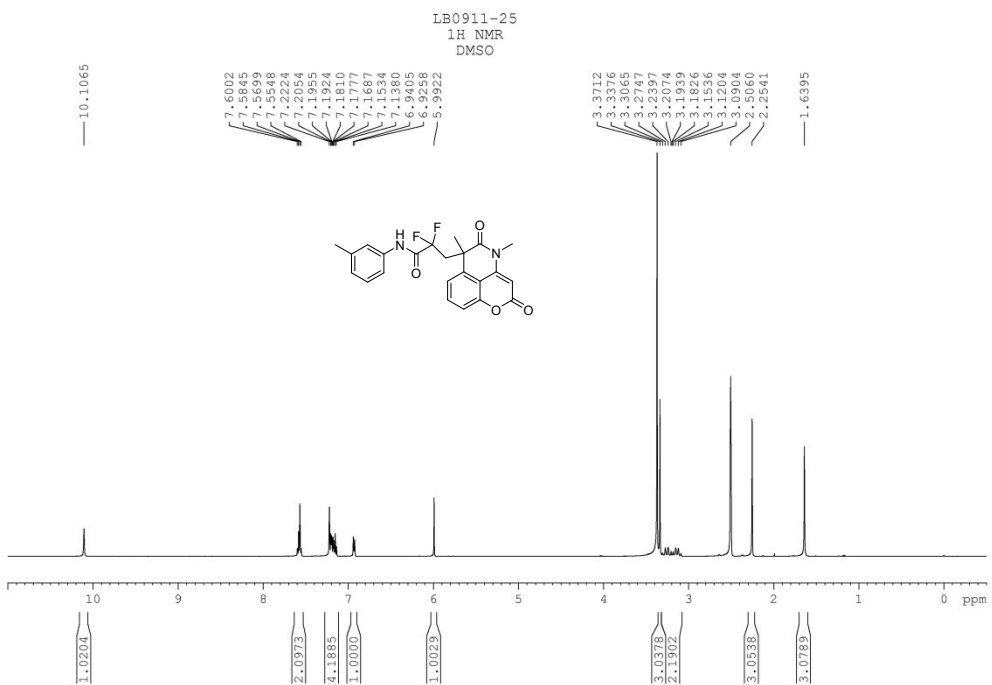

Fig. S44 <sup>1</sup>H NMR (500 MHz) spectrum of compound 4b

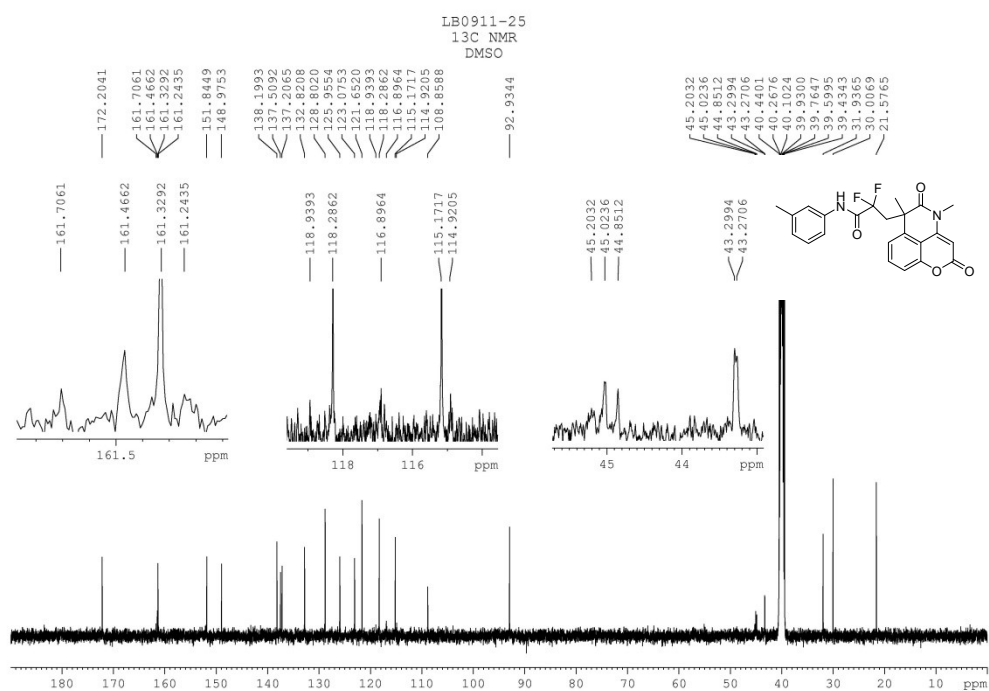

Fig. S45 <sup>13</sup>C NMR (126 MHz) spectrum of compound 4b

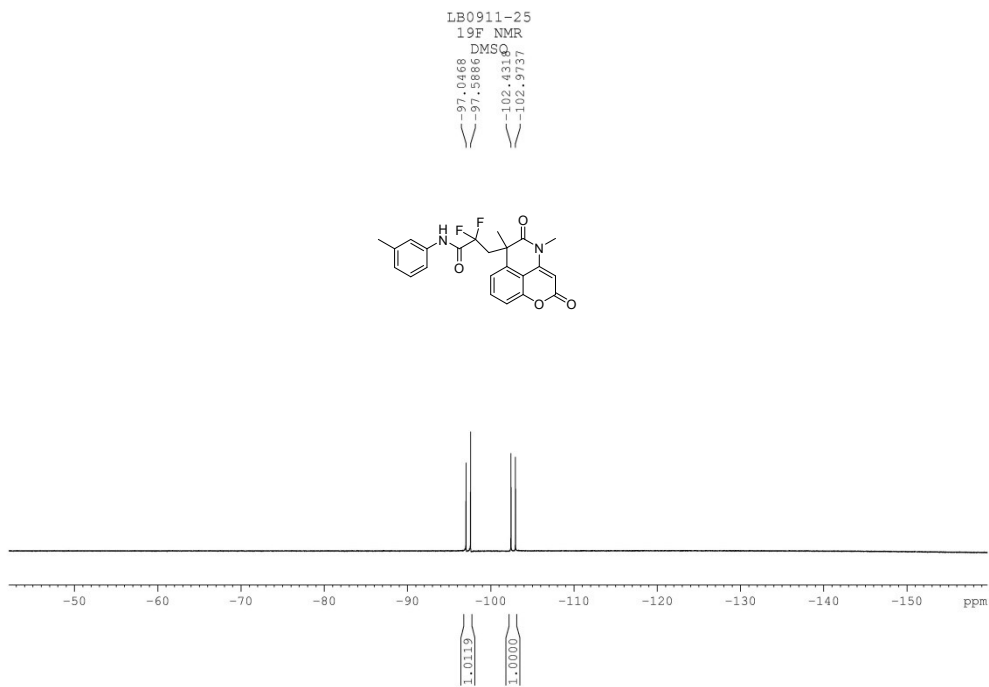

Fig. S46 <sup>19</sup>F NMR (471 MHz) spectrum of compound 4b

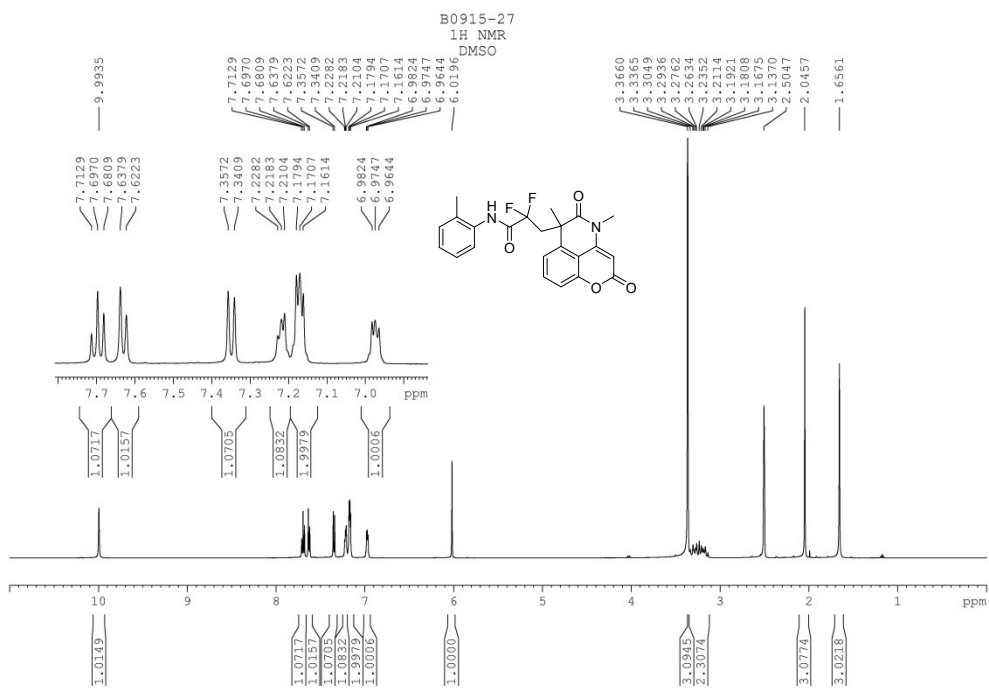

Fig. S47 <sup>1</sup>H NMR (500 MHz) spectrum of compound 4c

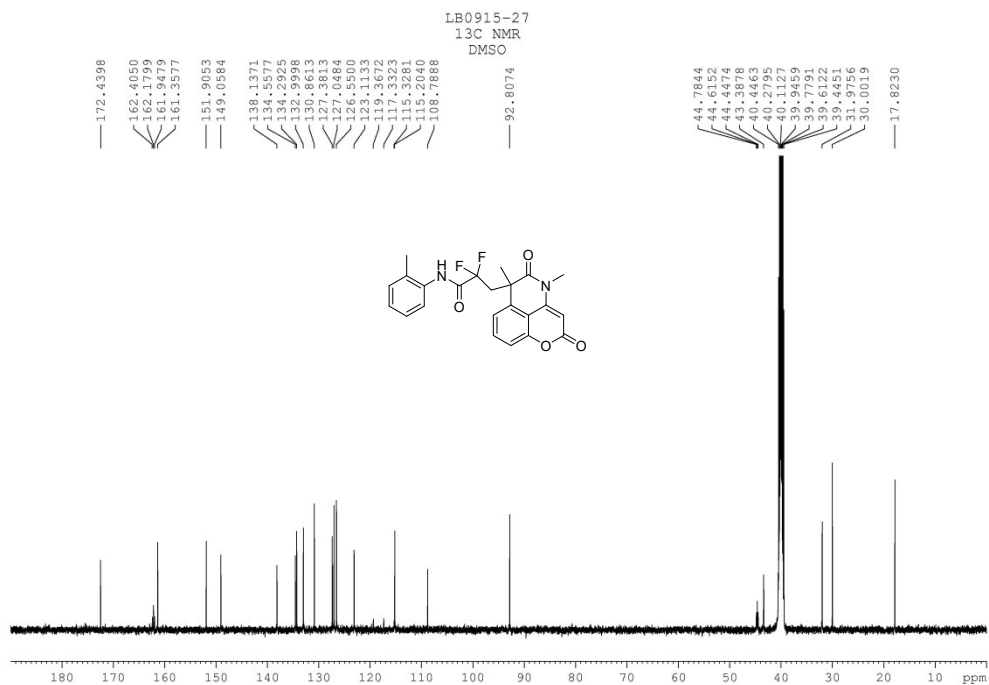

Fig. S48 <sup>13</sup>C NMR (126 MHz) spectrum of compound 4c

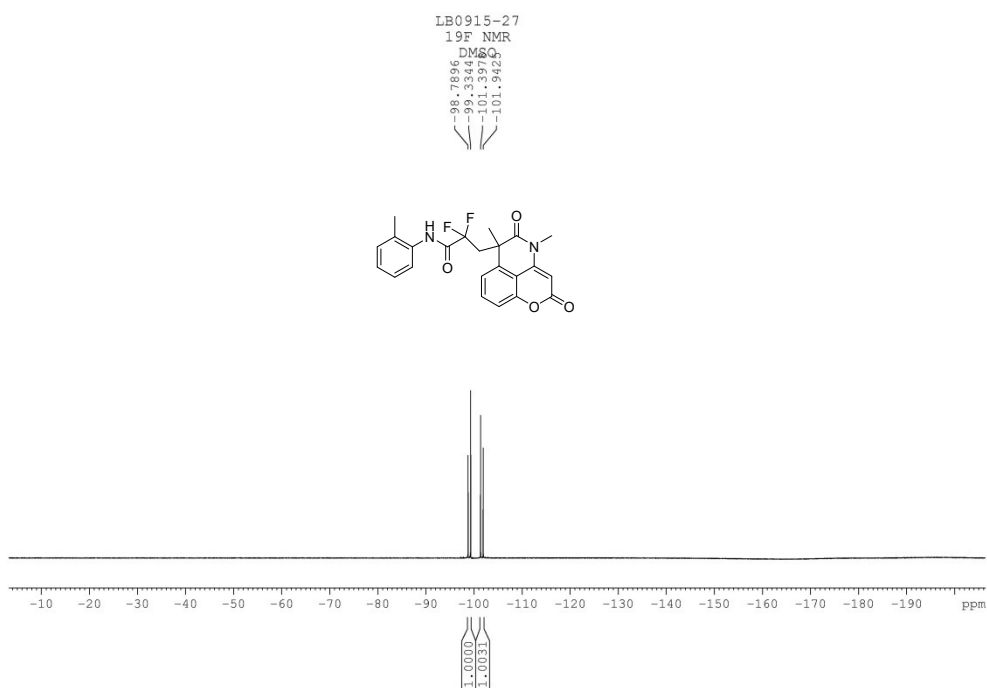

Fig. S49 <sup>19</sup>F NMR (471 MHz) spectrum of compound 4c

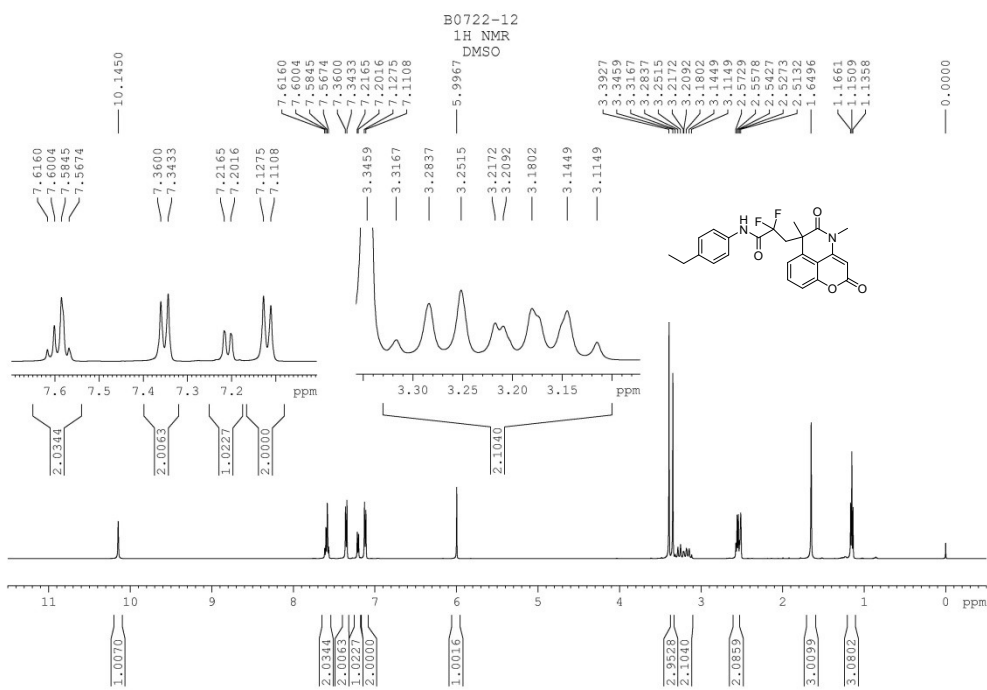

Fig. S50 <sup>1</sup>H NMR (500 MHz) spectrum of compound 4d

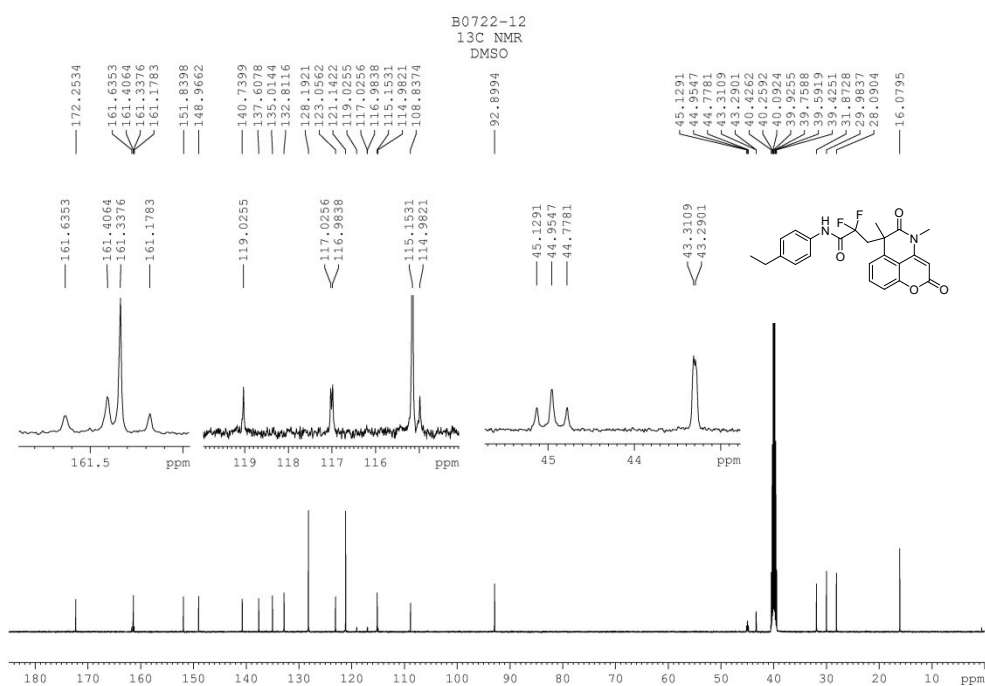

Fig. S51 <sup>13</sup>C NMR (126 MHz) spectrum of compound 4d

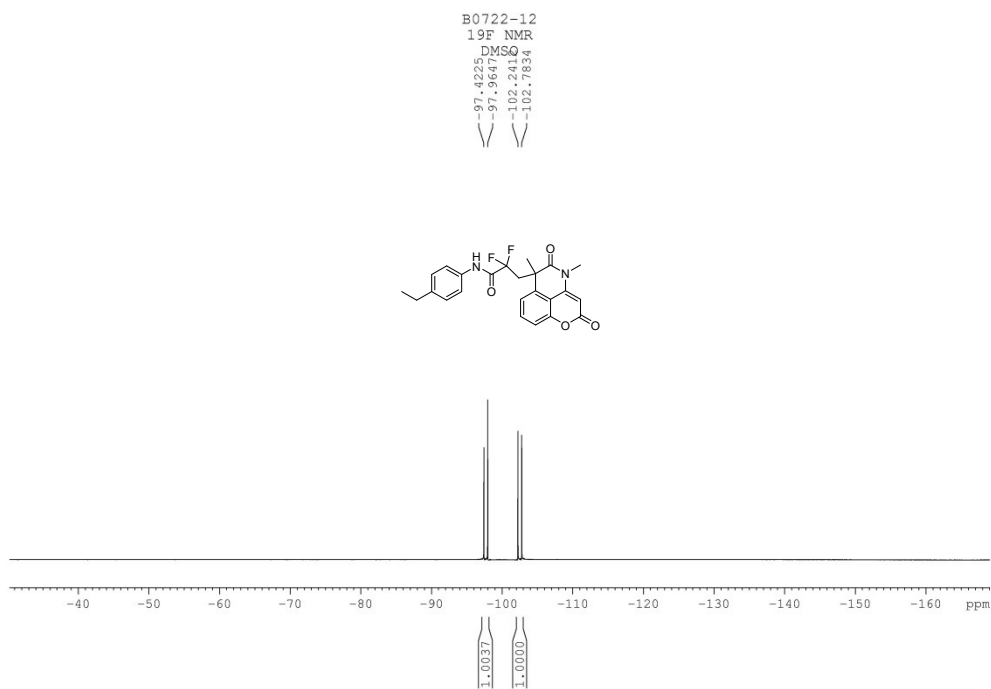

Fig. S52 <sup>19</sup>F NMR (471 MHz) spectrum of compound 4d

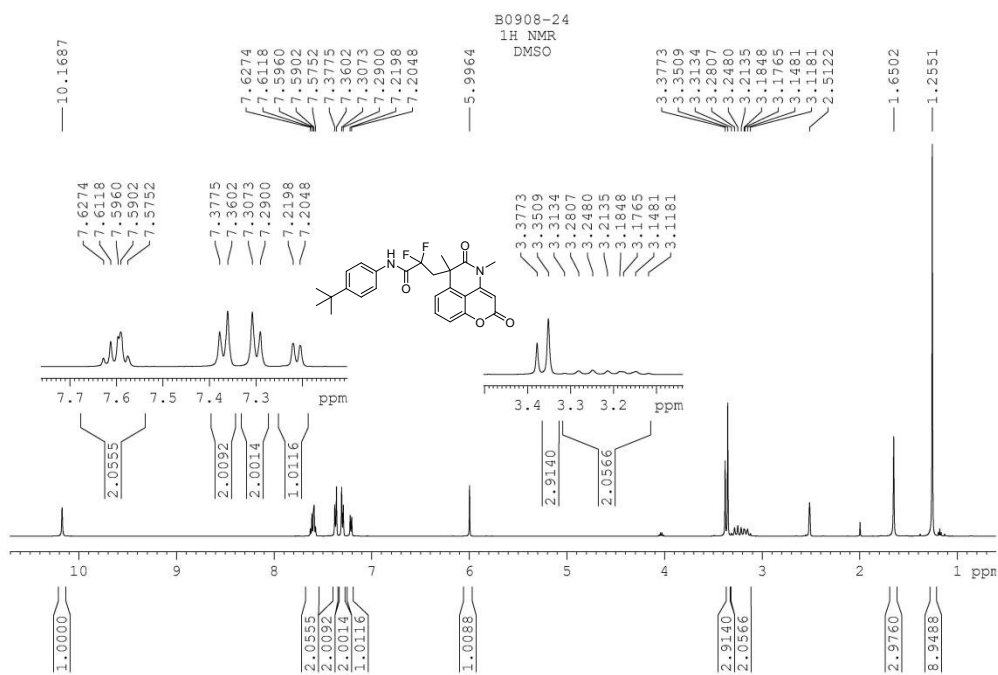

Fig. S53 <sup>1</sup>H NMR (500 MHz) spectrum of compound 4e

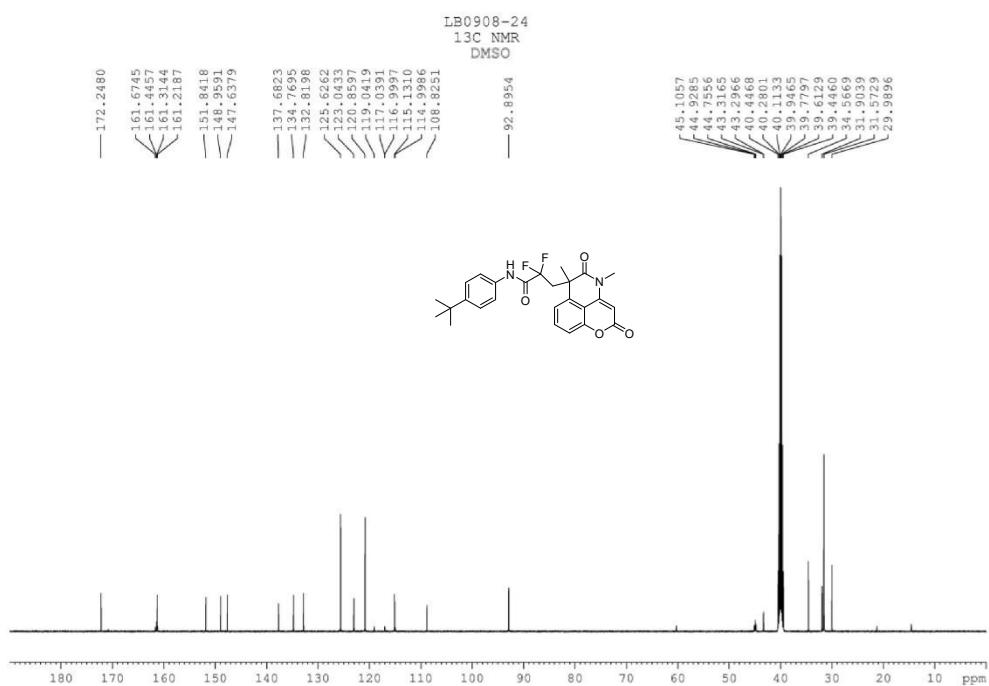

Fig. S54 <sup>13</sup>C NMR (126 MHz) spectrum of compound 4e

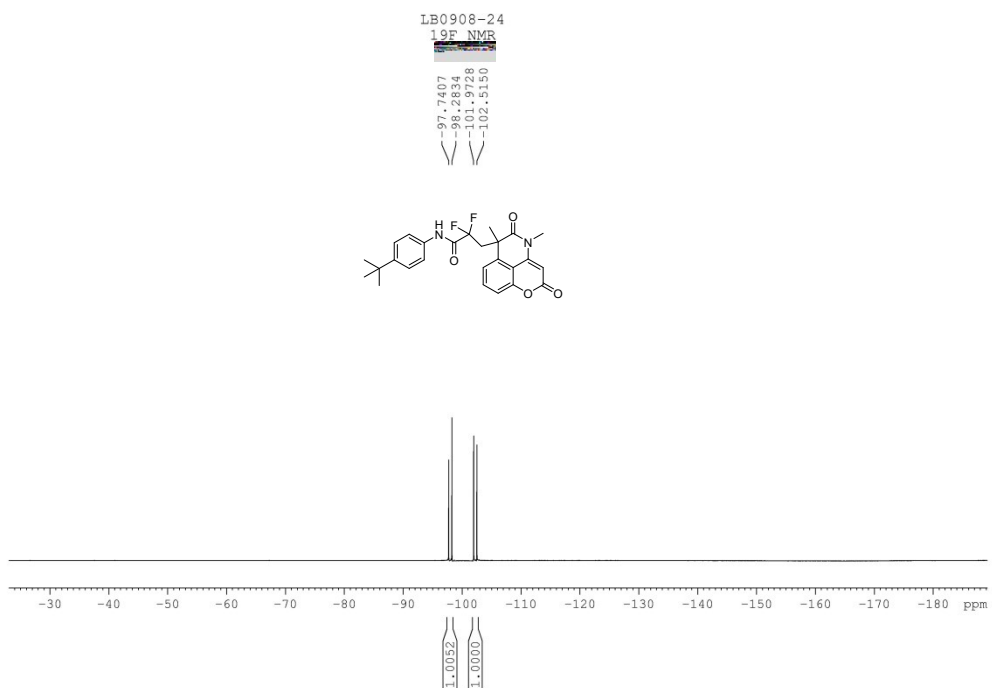

Fig. S55 <sup>19</sup>F NMR (471 MHz) spectrum of compound 4e

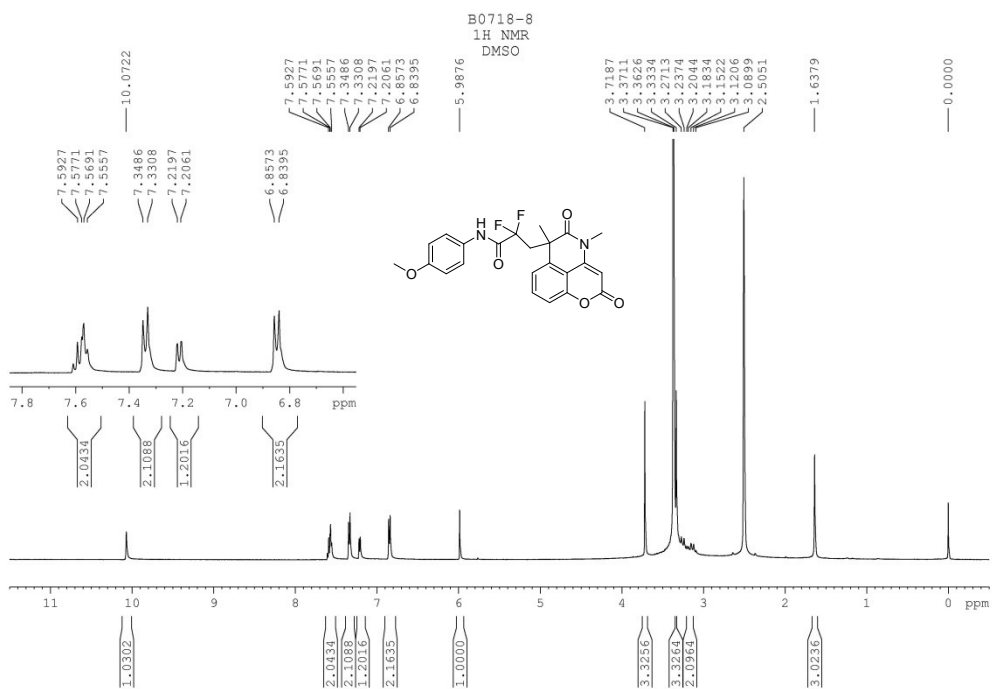

Fig. S56 <sup>1</sup>H NMR (500 MHz) spectrum of compound 4f

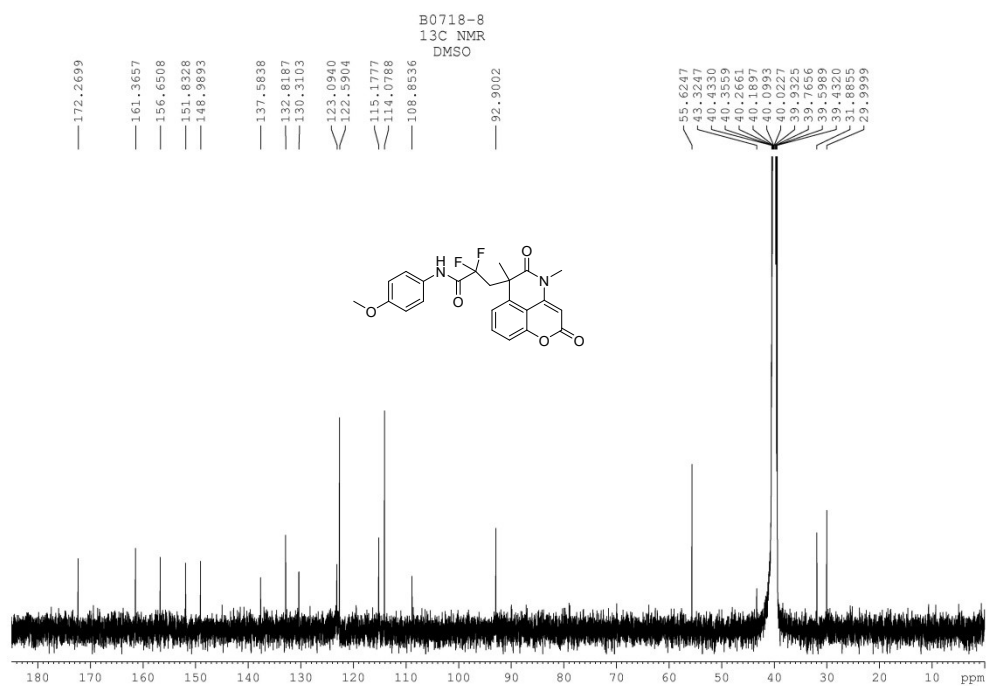

Fig. S57 <sup>13</sup>C NMR (126 MHz) spectrum of compound 4f

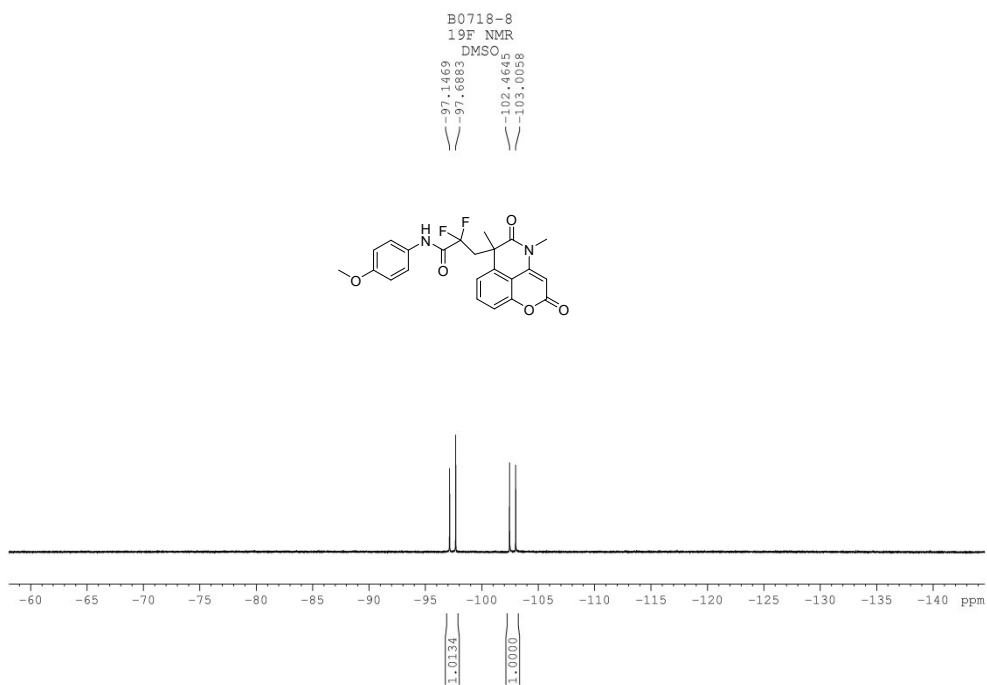

Fig. S58 <sup>19</sup>F NMR (471 MHz) spectrum of compound 4f

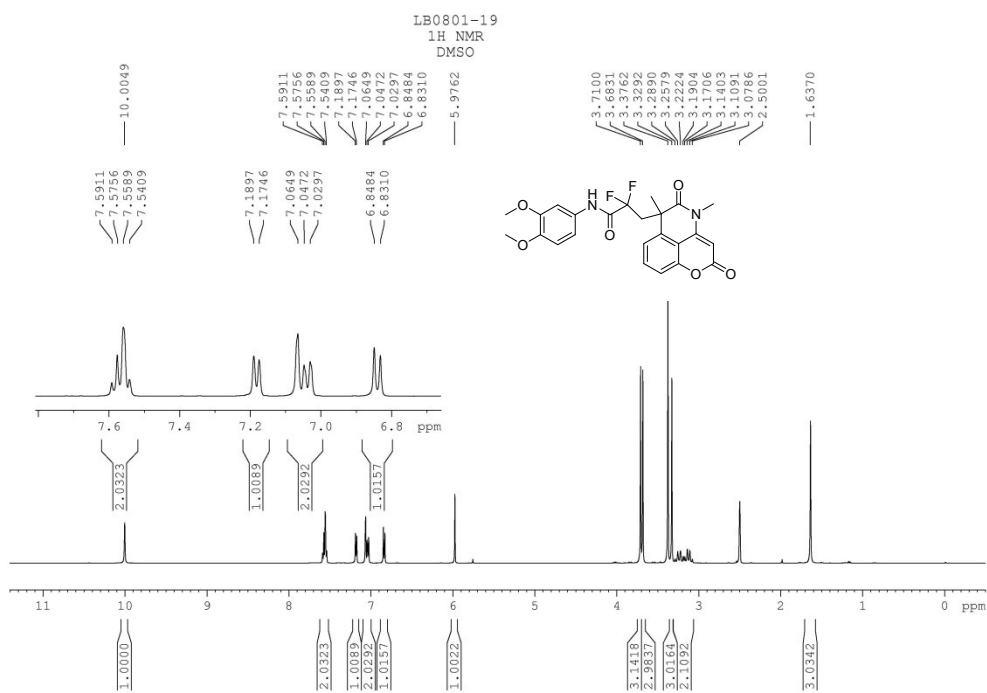

Fig. S59 <sup>1</sup>H NMR (500 MHz) spectrum of compound 4g

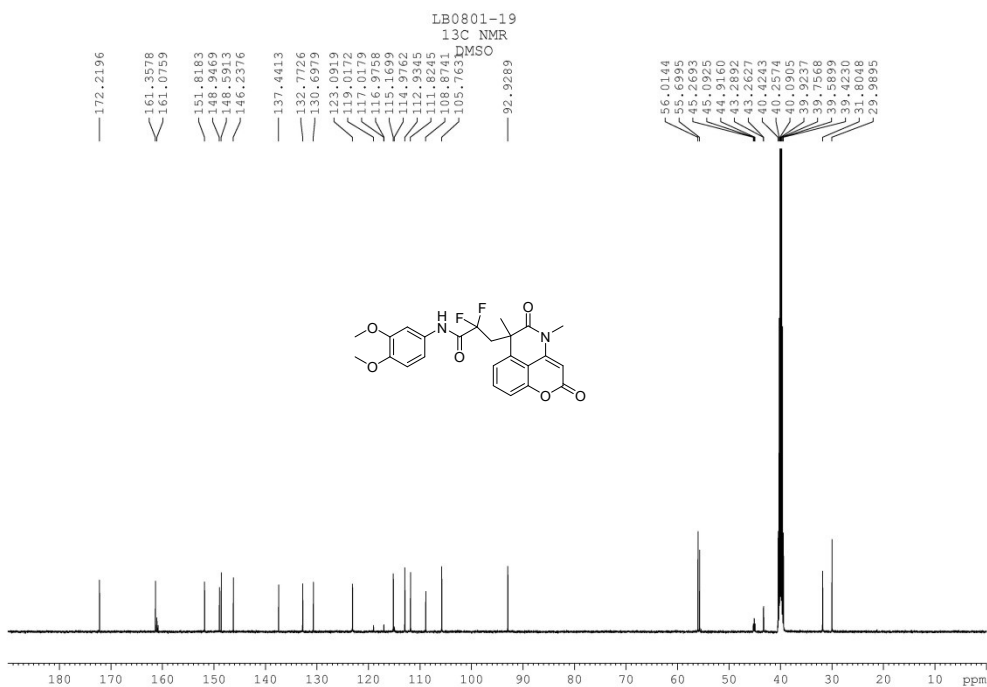

Fig. S60 <sup>13</sup>C NMR (126 MHz) spectrum of compound 4g

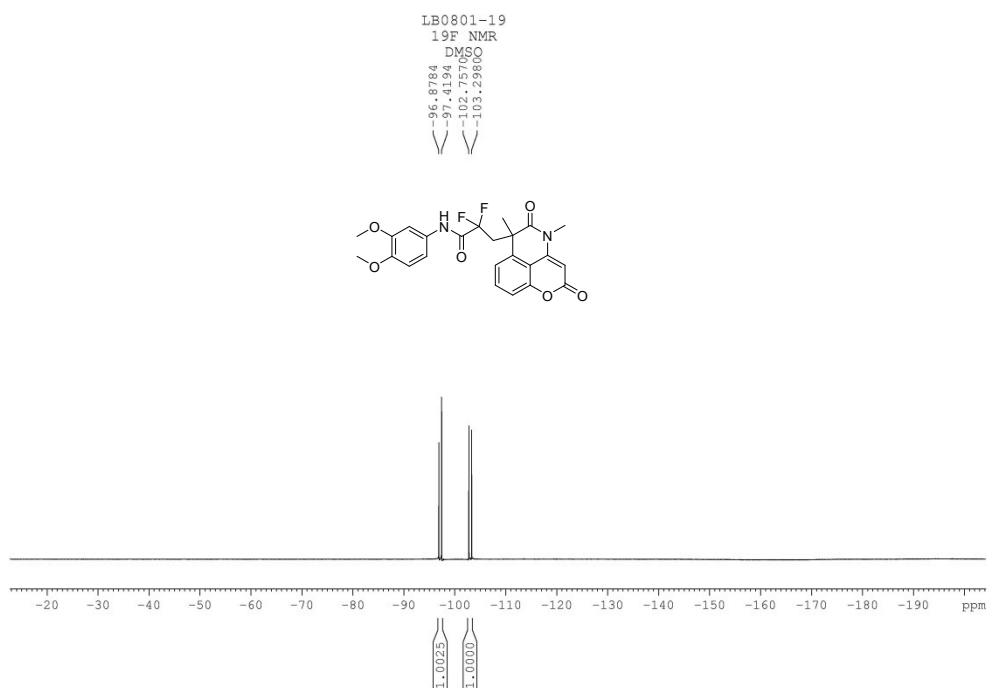

Fig. S61 <sup>19</sup>F NMR (471 MHz) spectrum of compound 4g

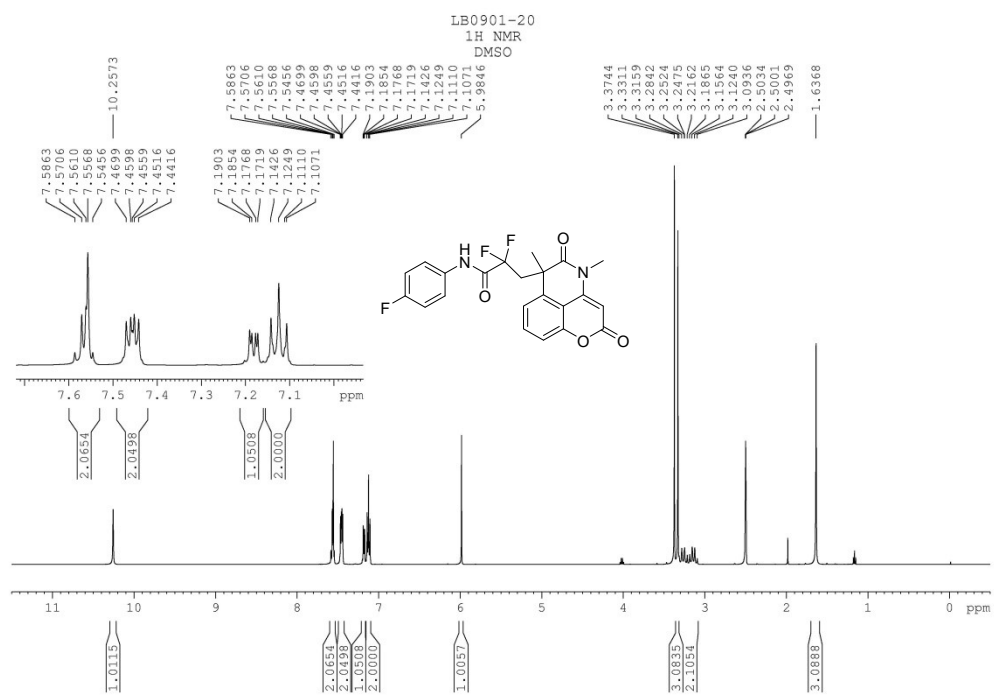

Fig. S62 <sup>1</sup>H NMR (500 MHz) spectrum of compound 4h

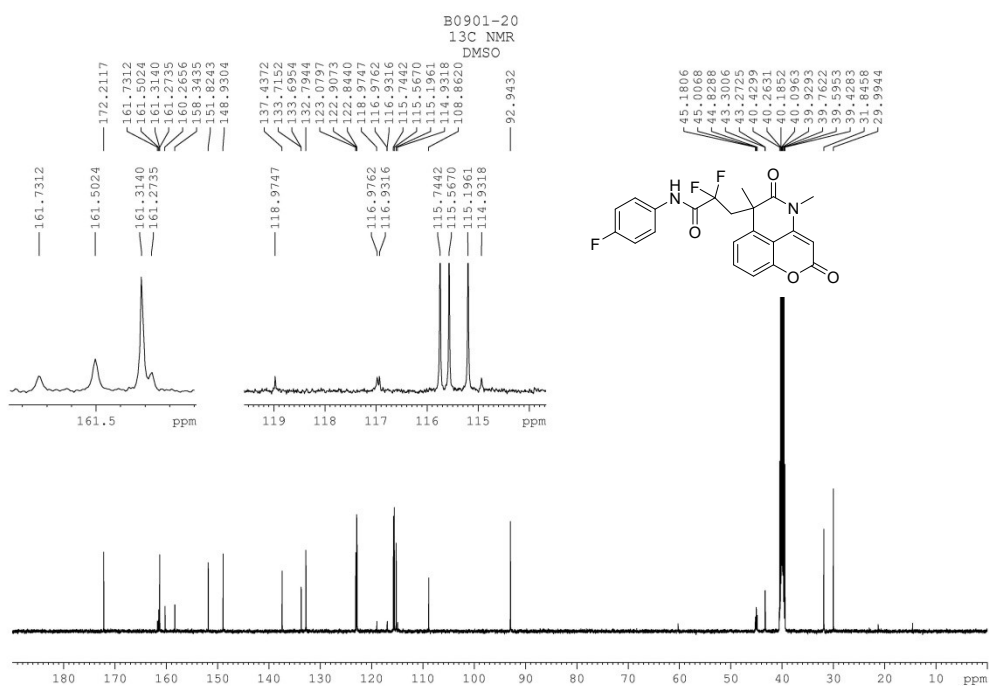

Fig. S63 <sup>13</sup>C NMR (126 MHz) spectrum of compound 4h

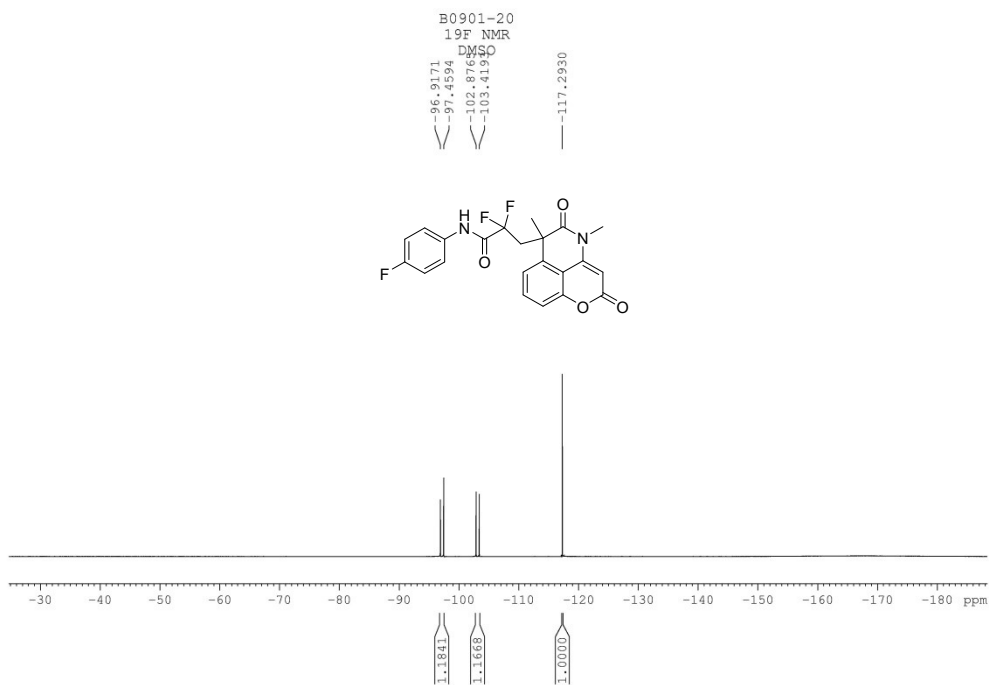

Fig. S64 <sup>19</sup>F NMR (471 MHz) spectrum of compound 4h



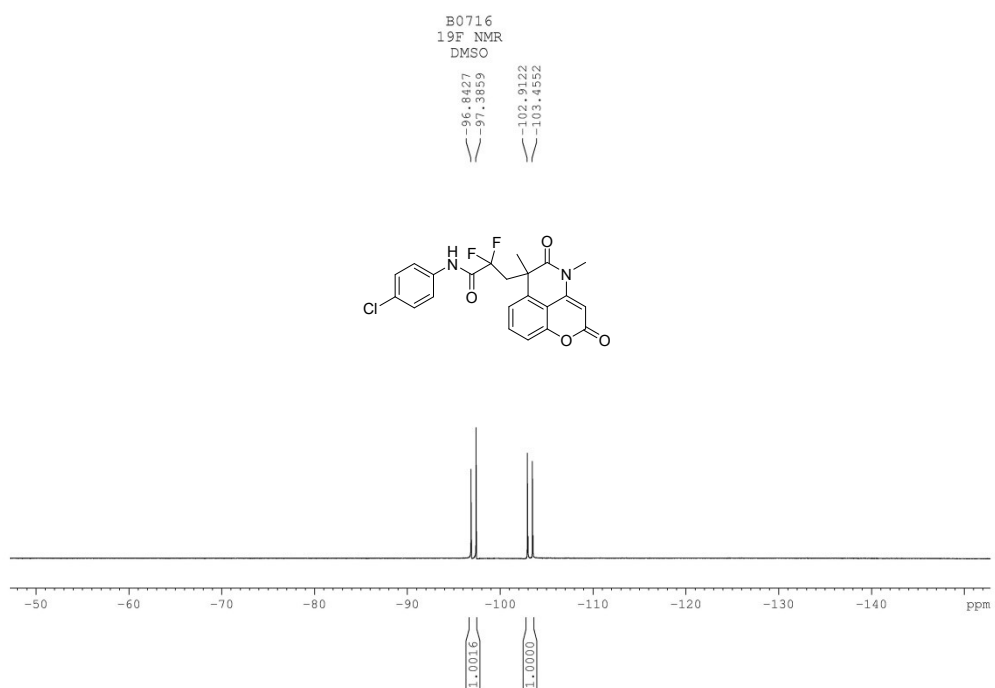

Fig. S67 <sup>19</sup>F NMR (471 MHz) spectrum of compound 4i

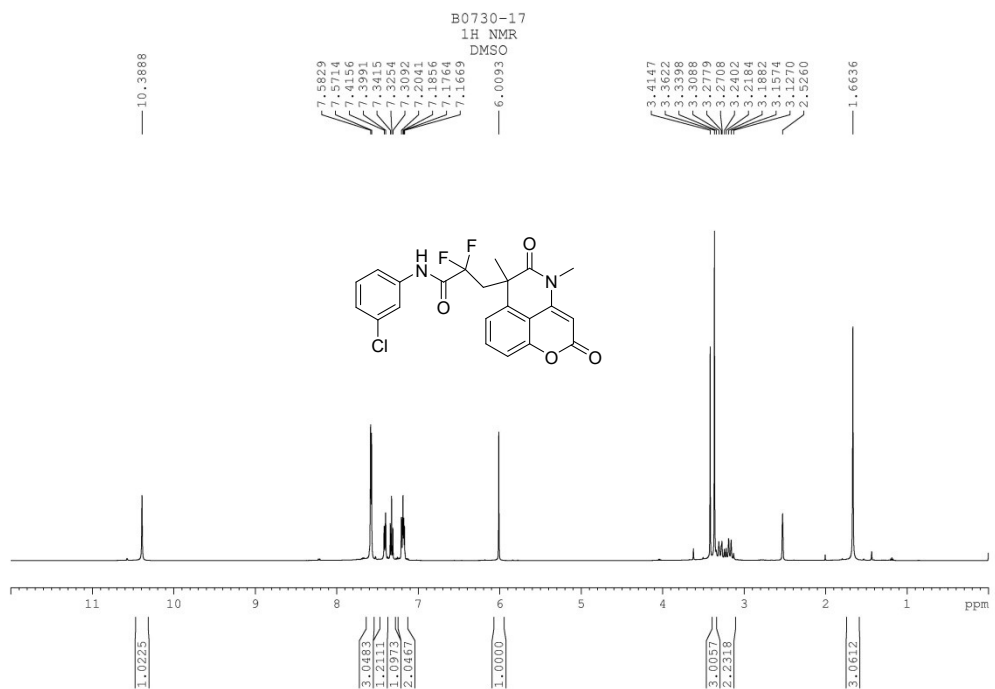

Fig. S68 <sup>1</sup>H NMR (500 MHz) spectrum of compound 4j

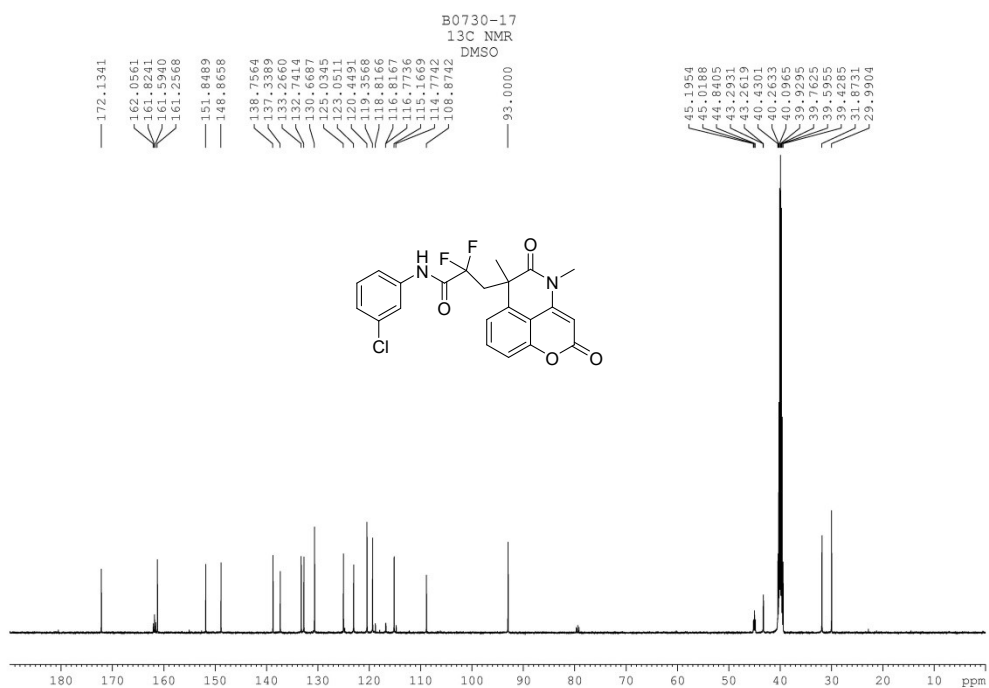

Fig. S69 <sup>13</sup>C NMR (126 MHz) spectrum of compound 4j

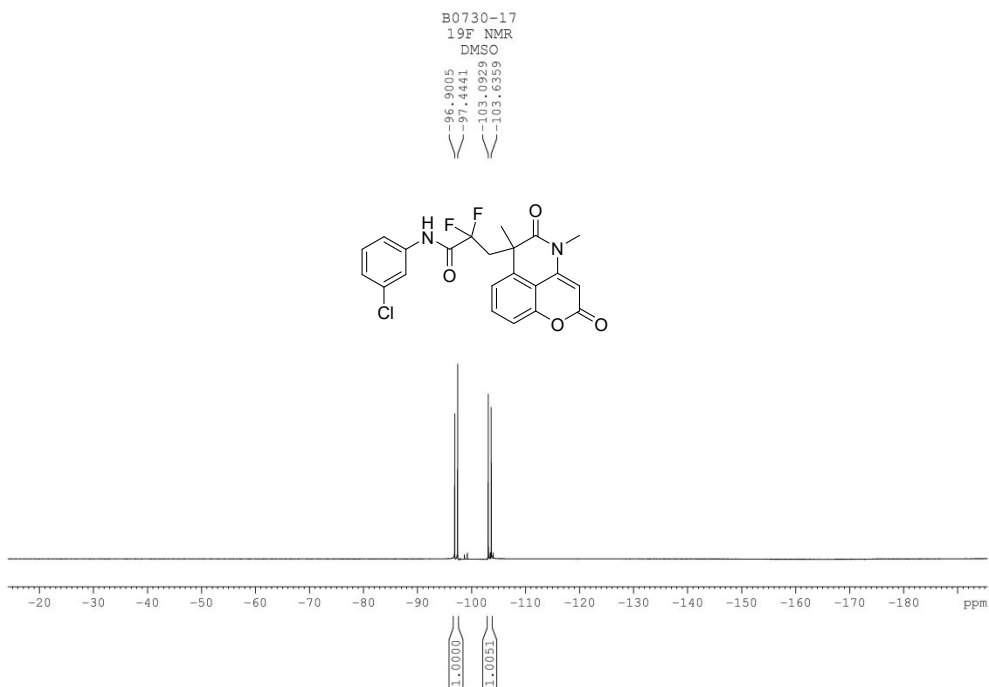

Fig. S70 <sup>19</sup>F NMR (471 MHz) spectrum of compound 4j

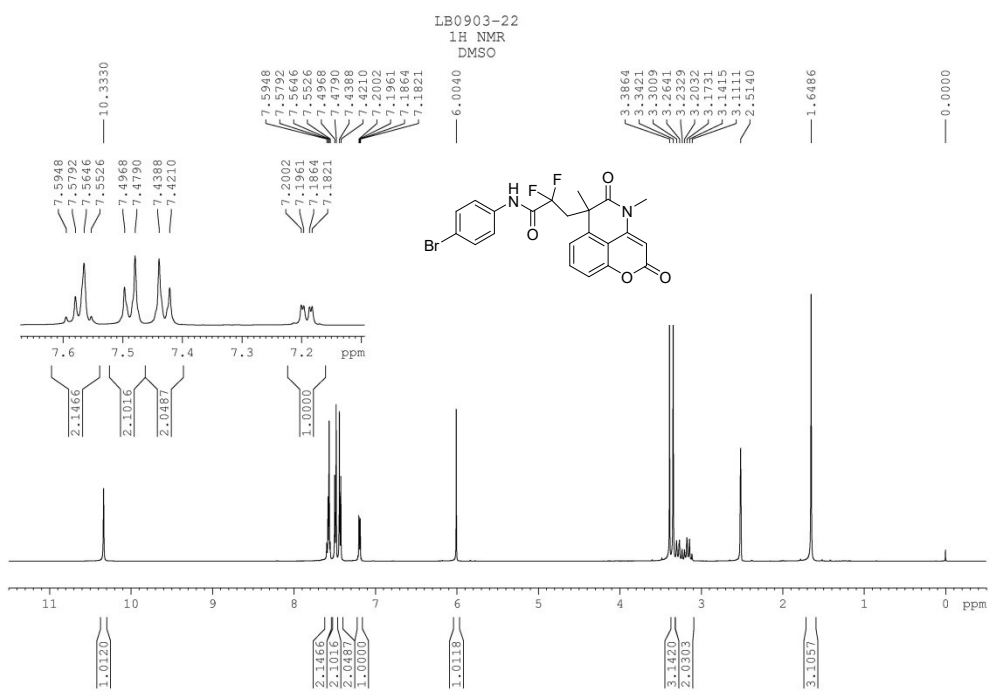

Fig. S71 <sup>1</sup>H NMR (500 MHz) spectrum of compound 4k

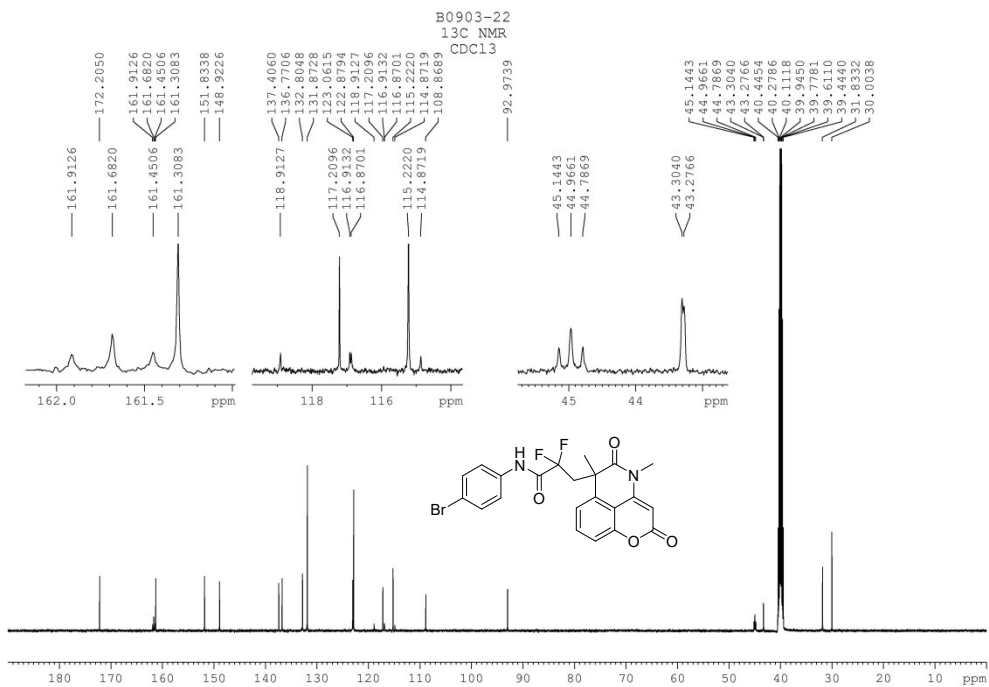

Fig. S72 <sup>13</sup>C NMR (126 MHz) spectrum of compound 4k

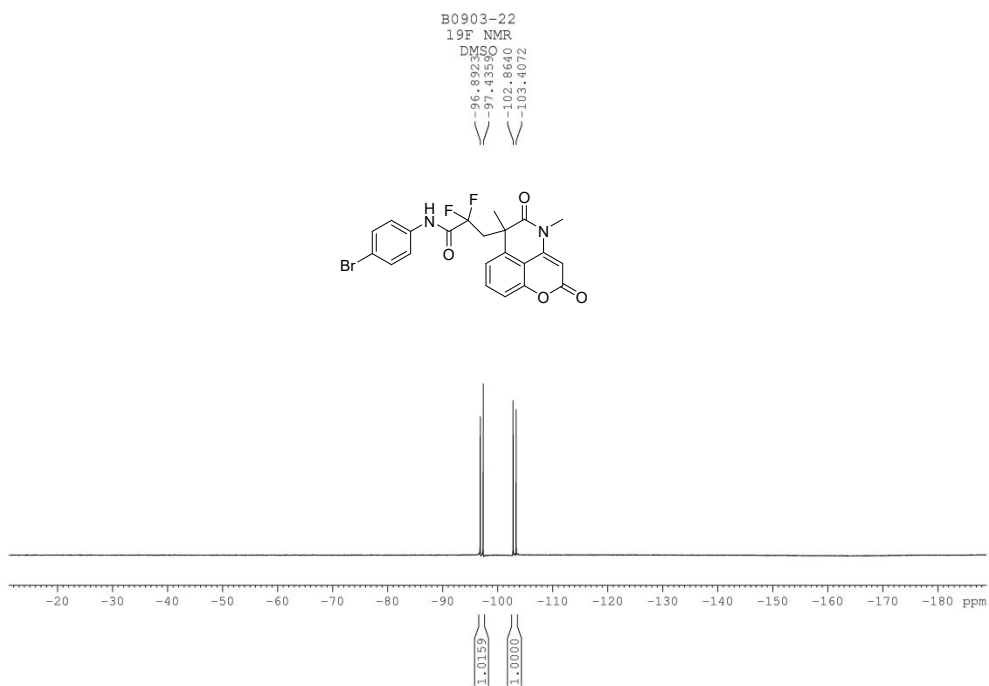

Fig. S73 <sup>19</sup>F NMR (471 MHz) spectrum of compound 4k

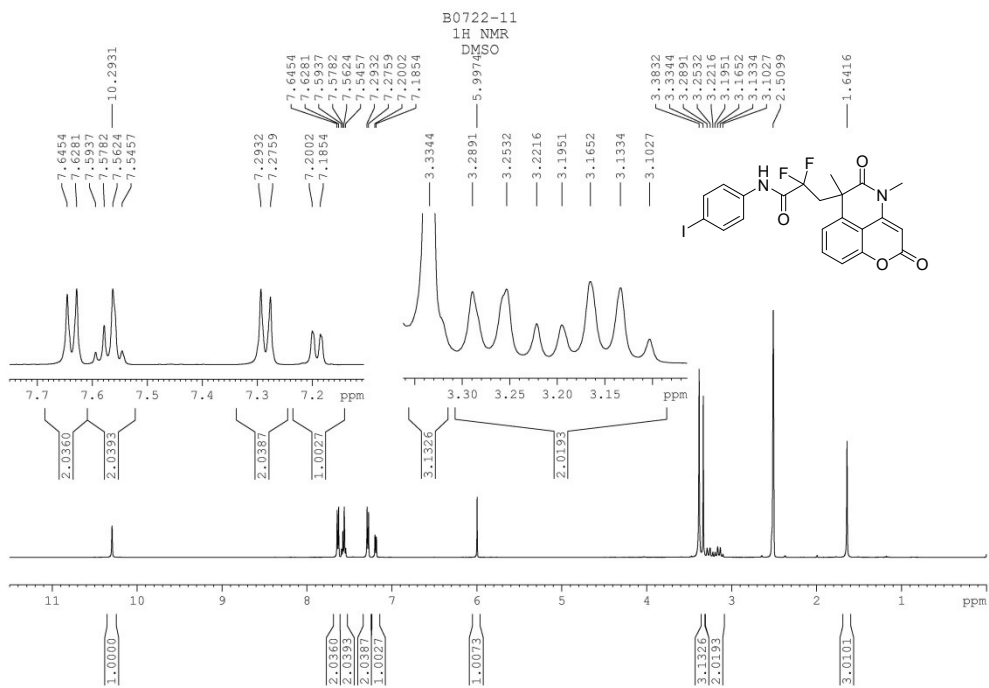

Fig. S74 <sup>1</sup>H NMR (500 MHz) spectrum of compound 4l

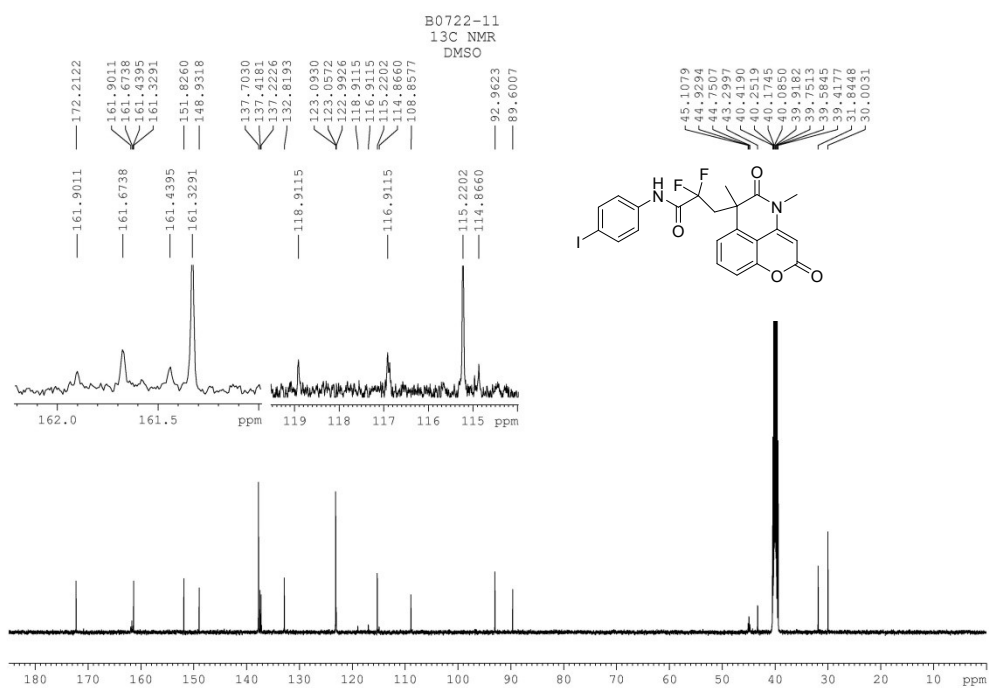

Fig. S75 <sup>13</sup>C NMR (126 MHz) spectrum of compound 41

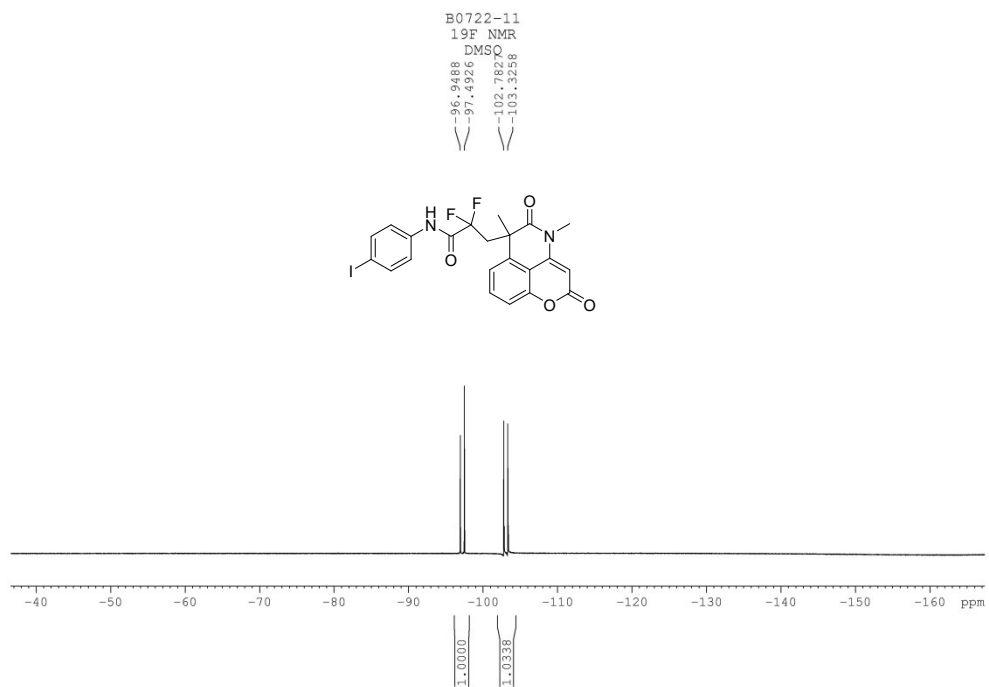

Fig. S76 <sup>19</sup>F NMR (471 MHz) spectrum of compound 41

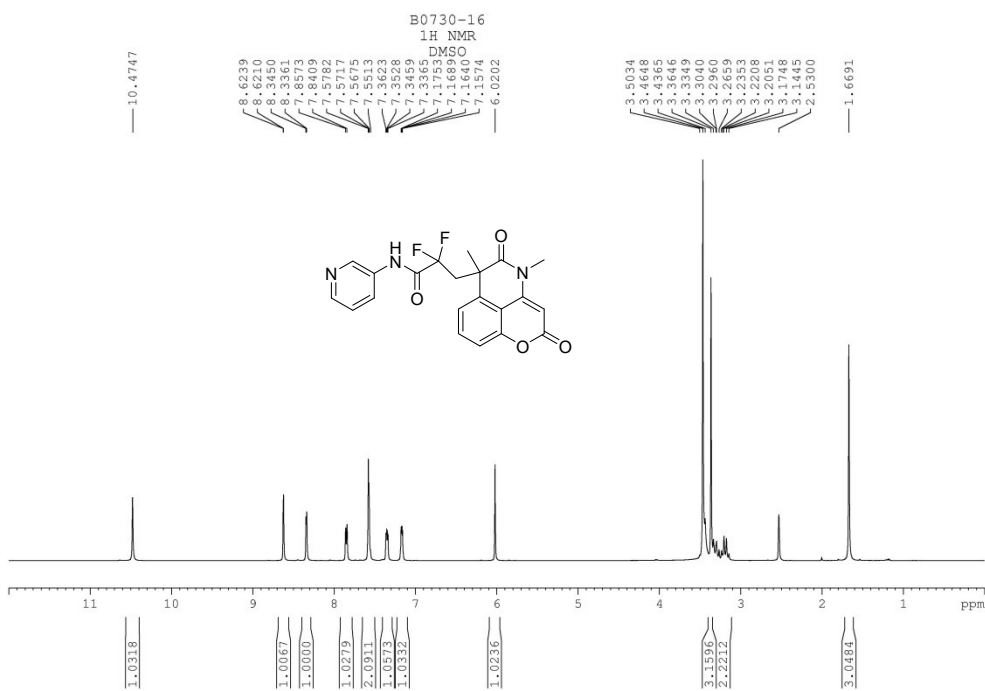

Fig. S77 <sup>1</sup>H NMR (500 MHz) spectrum of compound 4m

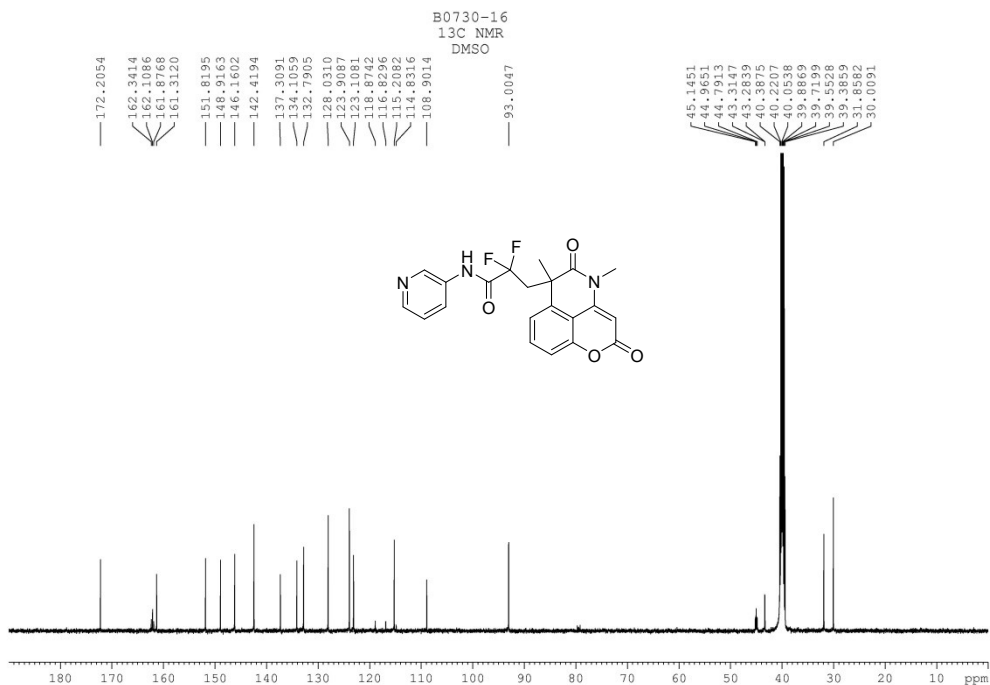

Fig. S78 <sup>13</sup>C NMR (126 MHz) spectrum of compound 4m

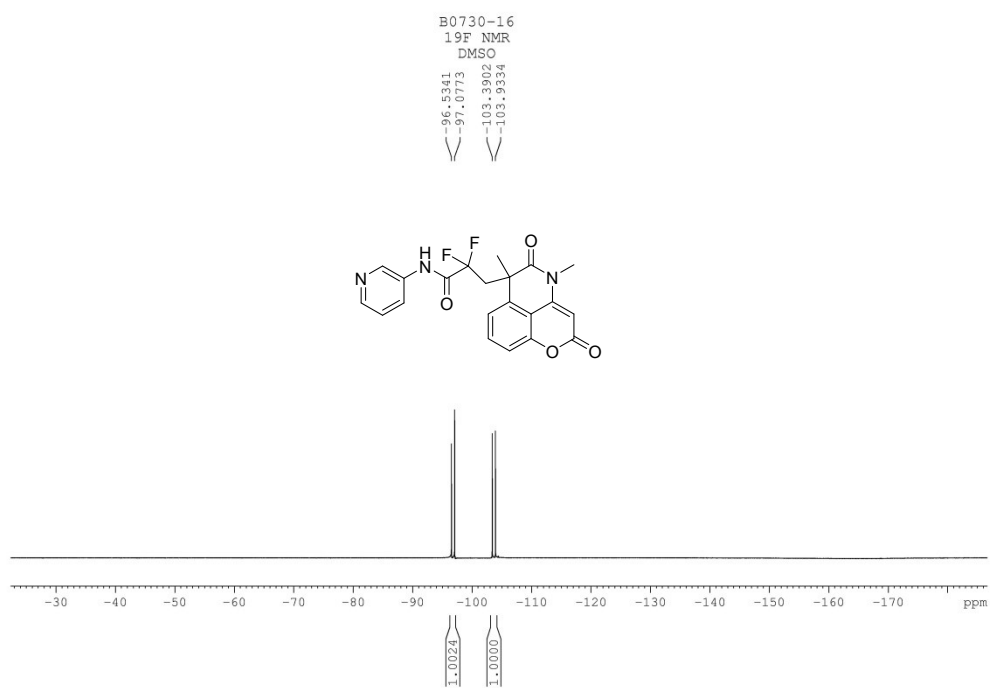

Fig. S79 <sup>19</sup>F NMR (471 MHz) spectrum of compound 4m

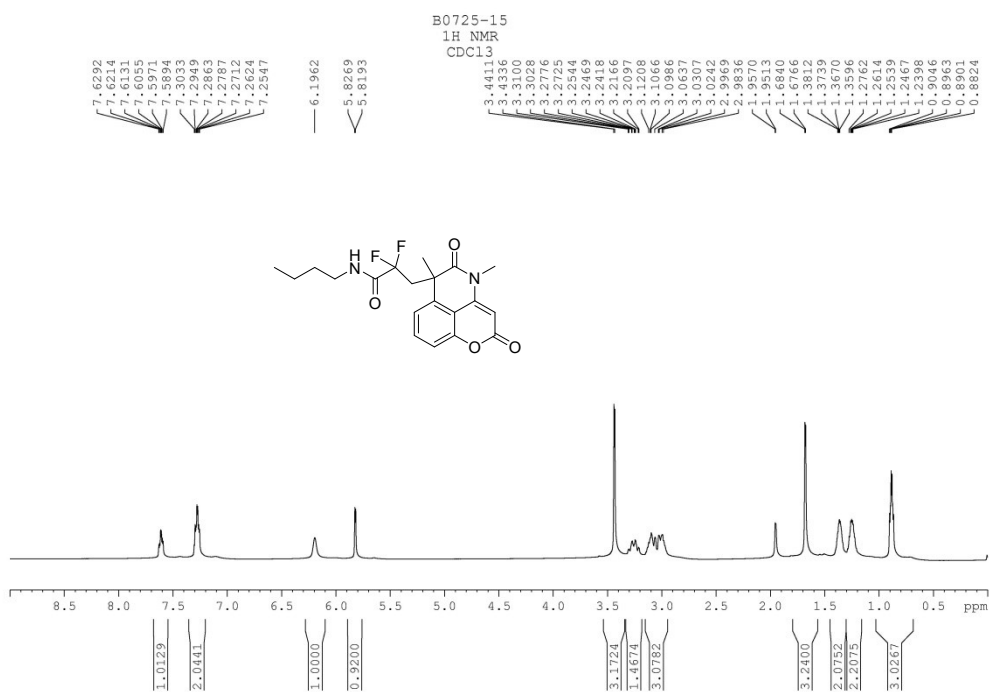

Fig. S80 <sup>1</sup>H NMR (500 MHz) spectrum of compound 4n

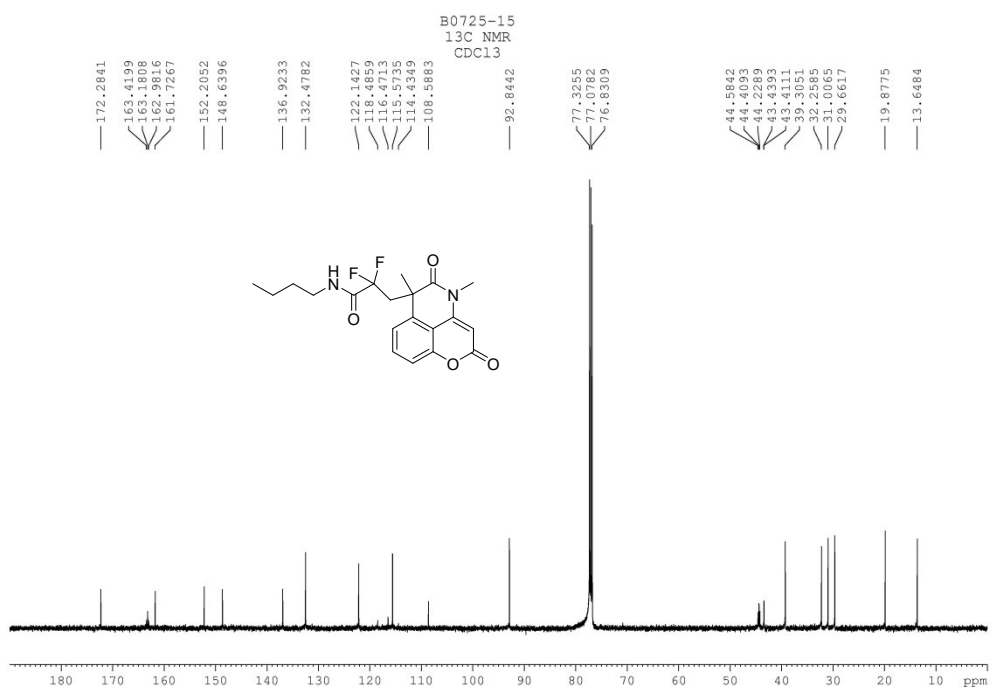

Fig. S81 <sup>13</sup>C NMR (126 MHz) spectrum of compound 4n

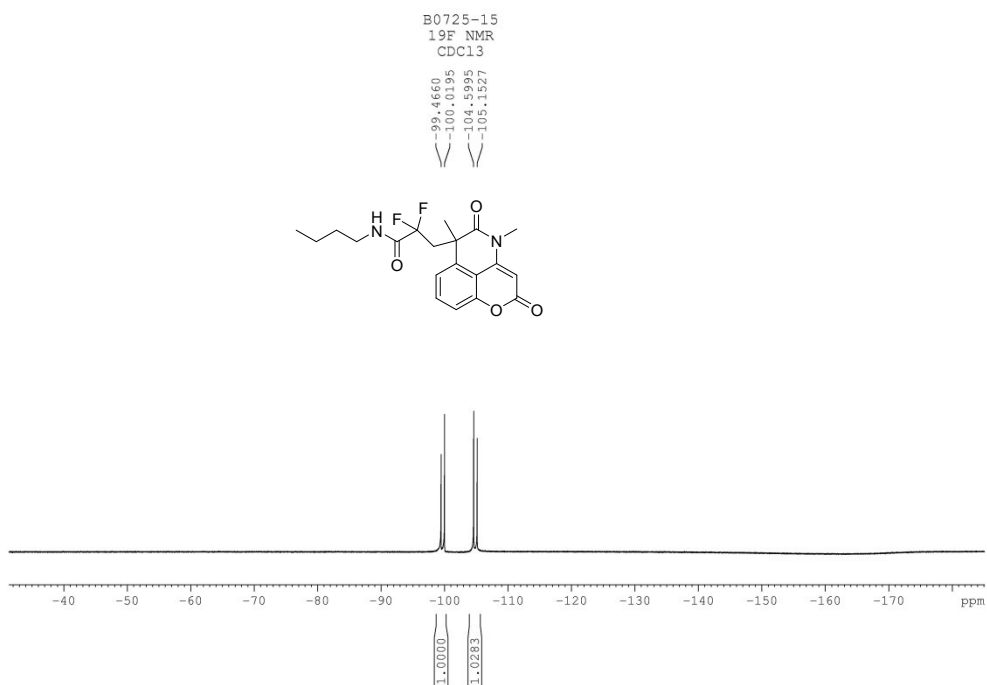

Fig. S82 <sup>19</sup>F NMR (471 MHz) spectrum of compound 4n

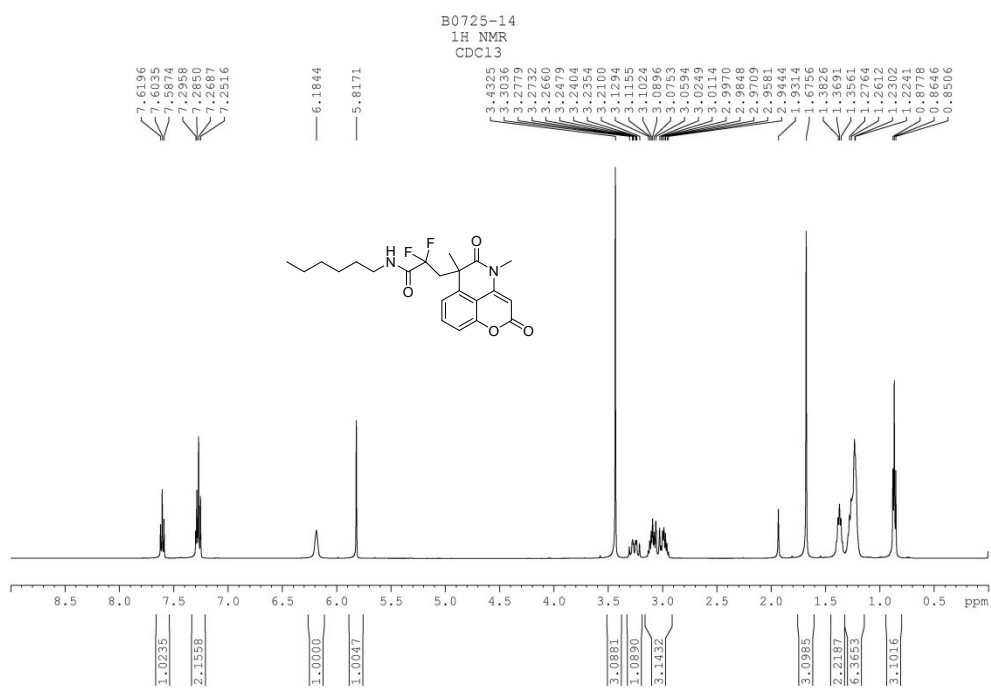

Fig.S S82 <sup>1</sup>H NMR (500 MHz) spectrum of compound 4o

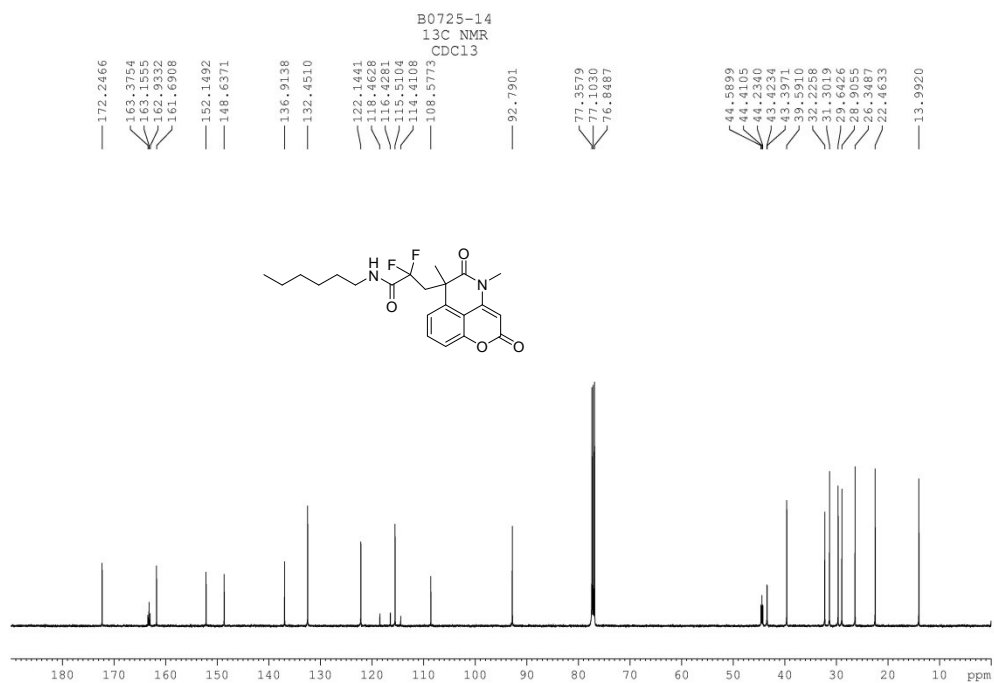

Fig. S83 <sup>13</sup>C NMR (126 MHz) spectrum of compound 4o

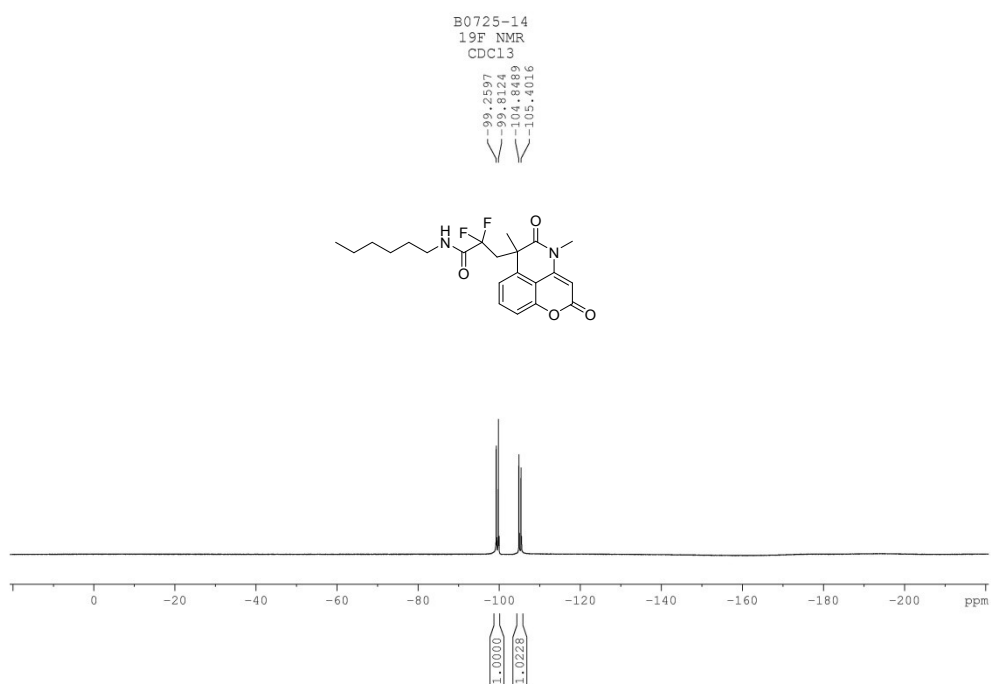

Fig. S84 <sup>19</sup>F NMR (471 MHz) spectrum of compound 4o

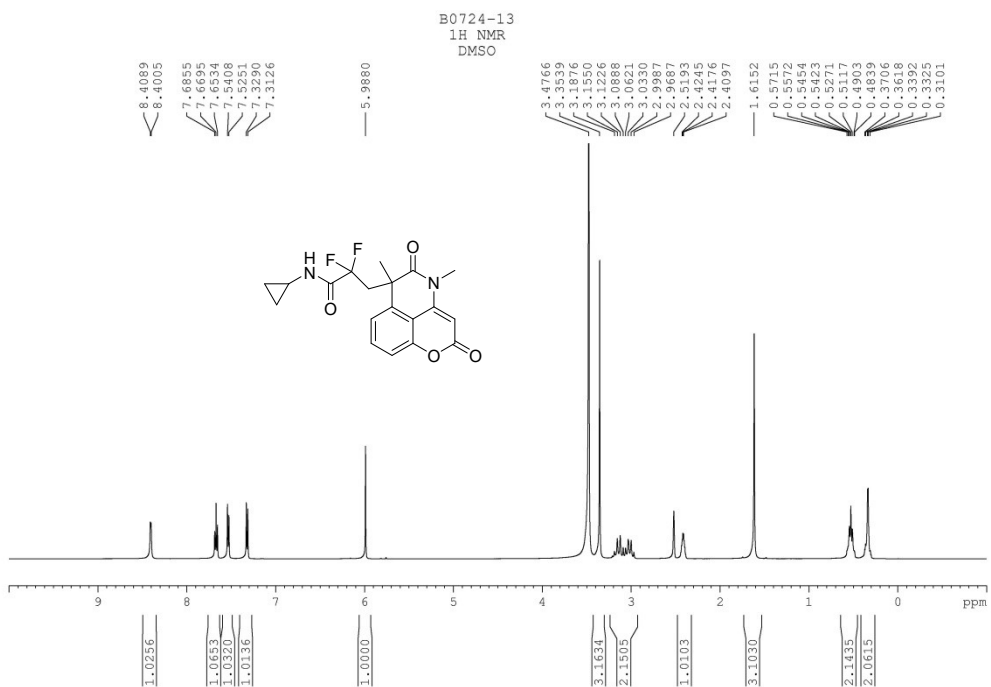

Fig. S85 <sup>1</sup>H NMR (500 MHz) spectrum of compound 4p

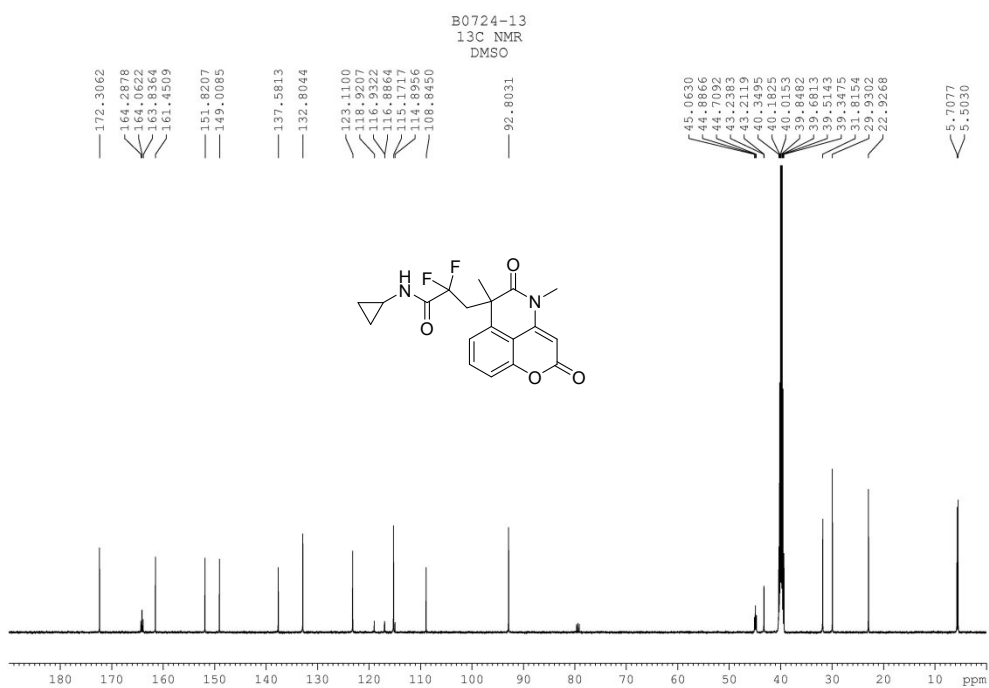

Fig. S86 <sup>13</sup>C NMR (126 MHz) spectrum of compound 4p

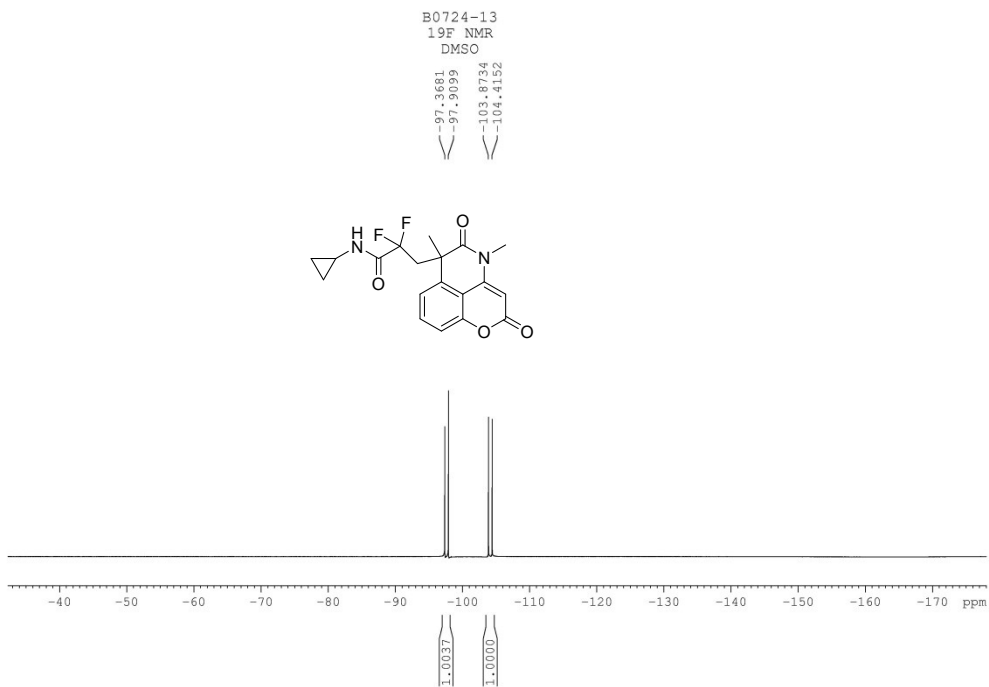

Fig. S87 <sup>19</sup>F NMR (471 MHz) spectrum of compound 4p

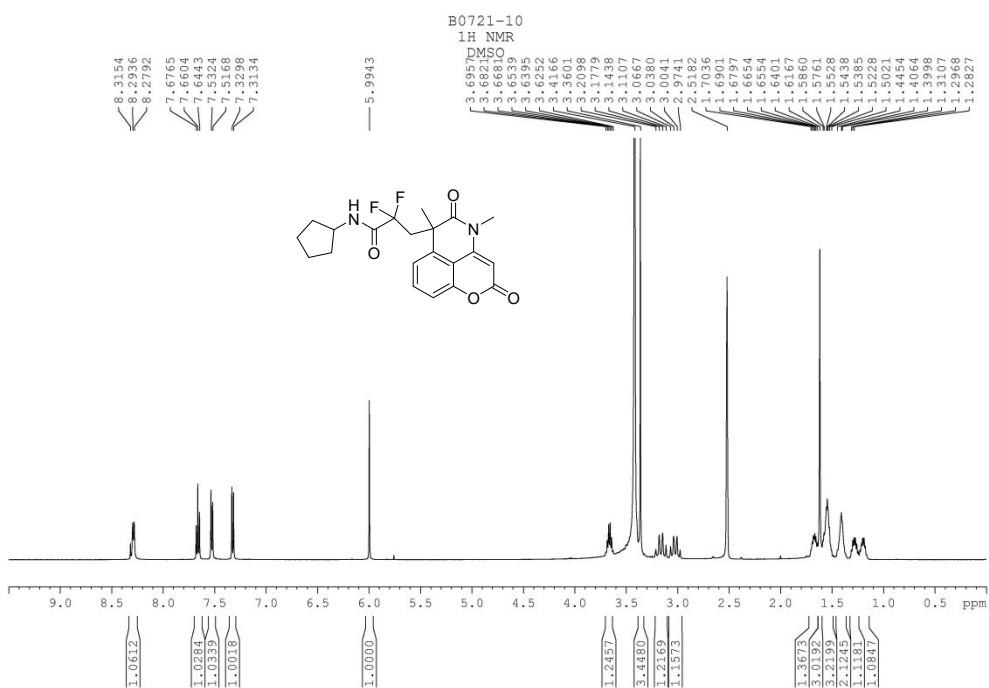

Fig. S88 <sup>1</sup>H NMR (500 MHz) spectrum of compound 4q

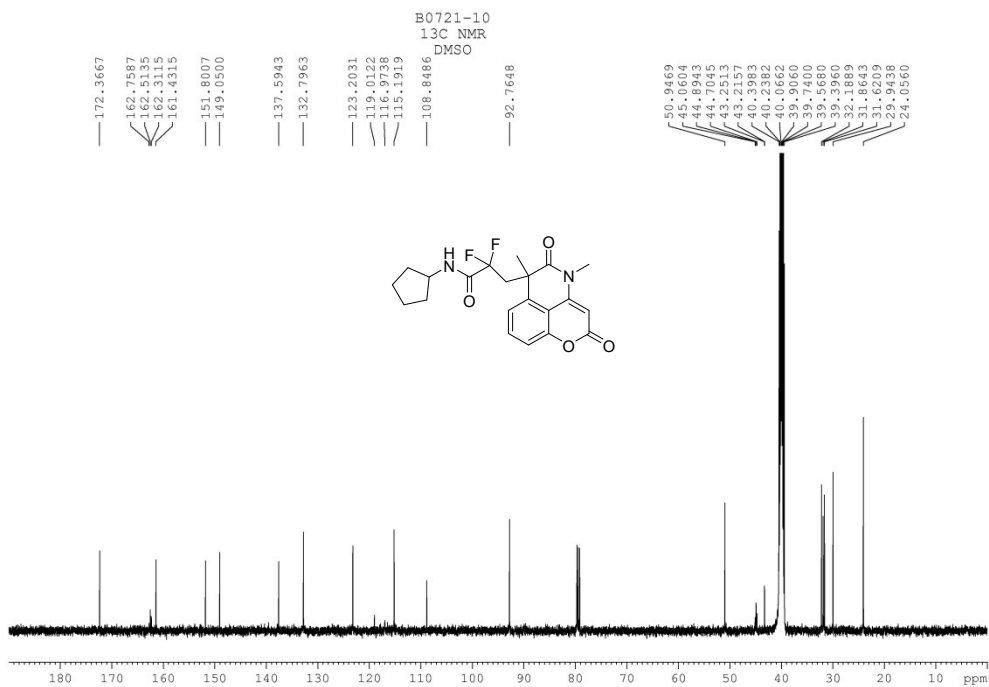

Fig. S89 <sup>13</sup>C NMR (126 MHz) spectrum of compound 4q

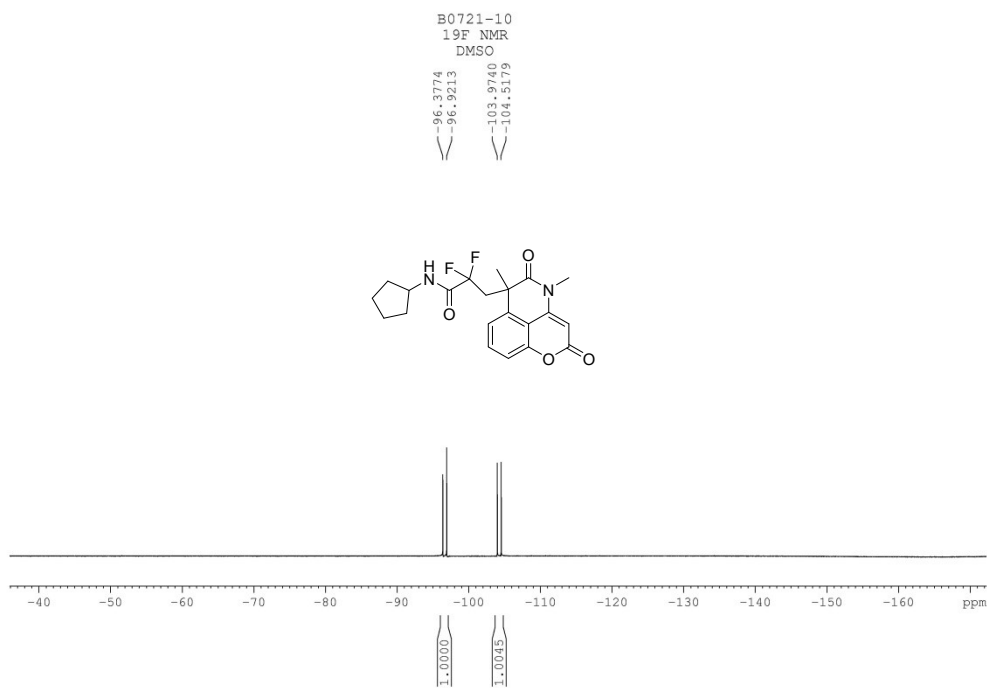

Fig. S90 <sup>19</sup>F NMR (471 MHz) spectrum of compound 4q

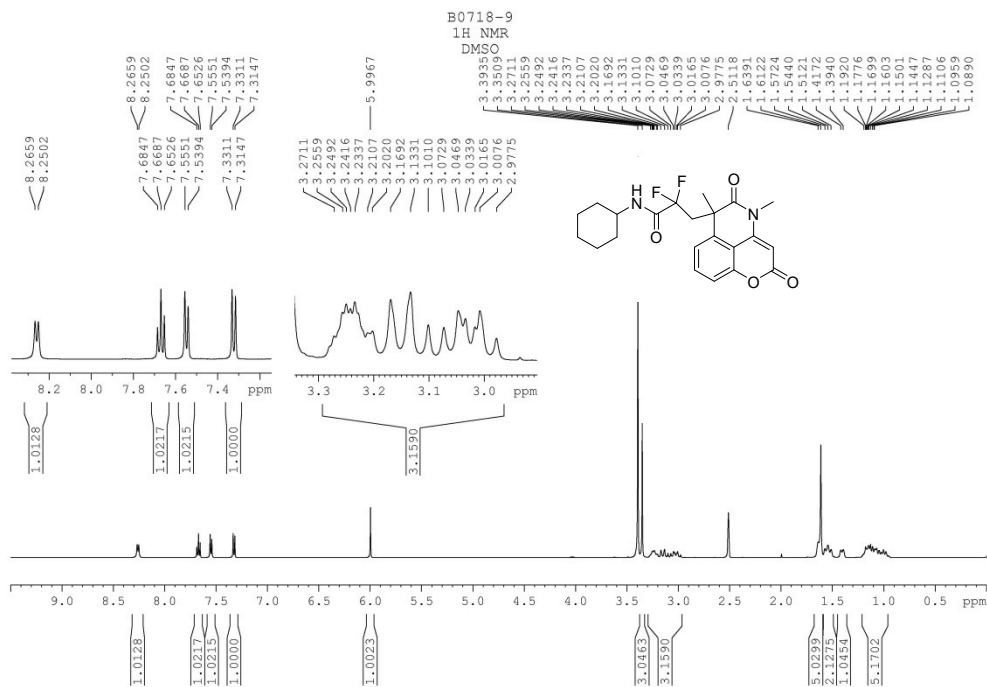

Fig. S91 <sup>1</sup>H NMR (500 MHz) spectrum of compound 4r

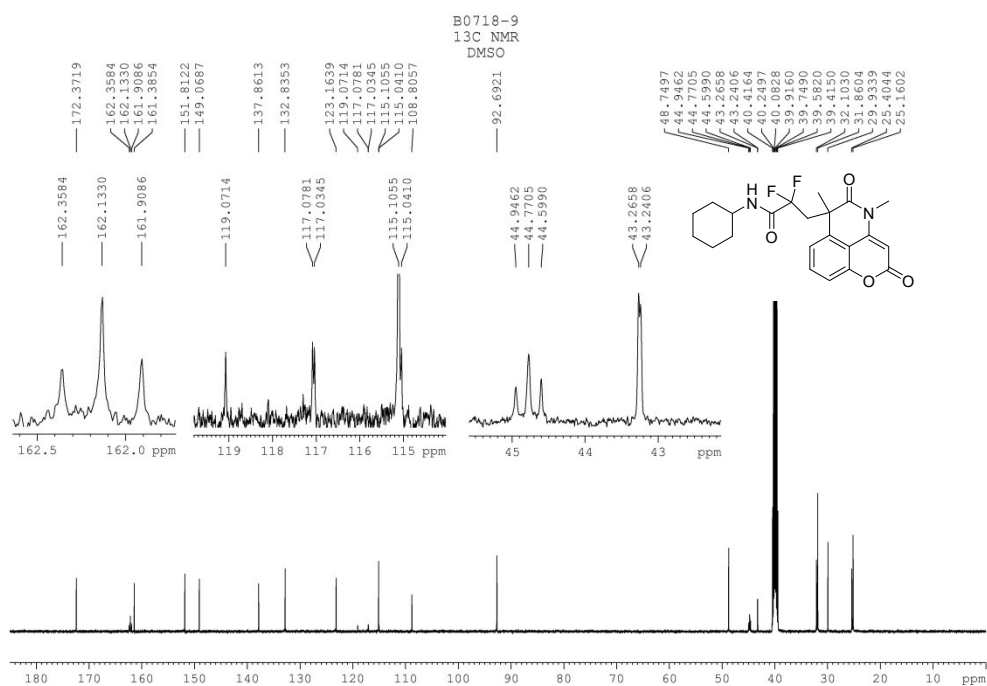

Fig. S92 <sup>13</sup>C NMR (126 MHz) spectrum of compound 4r

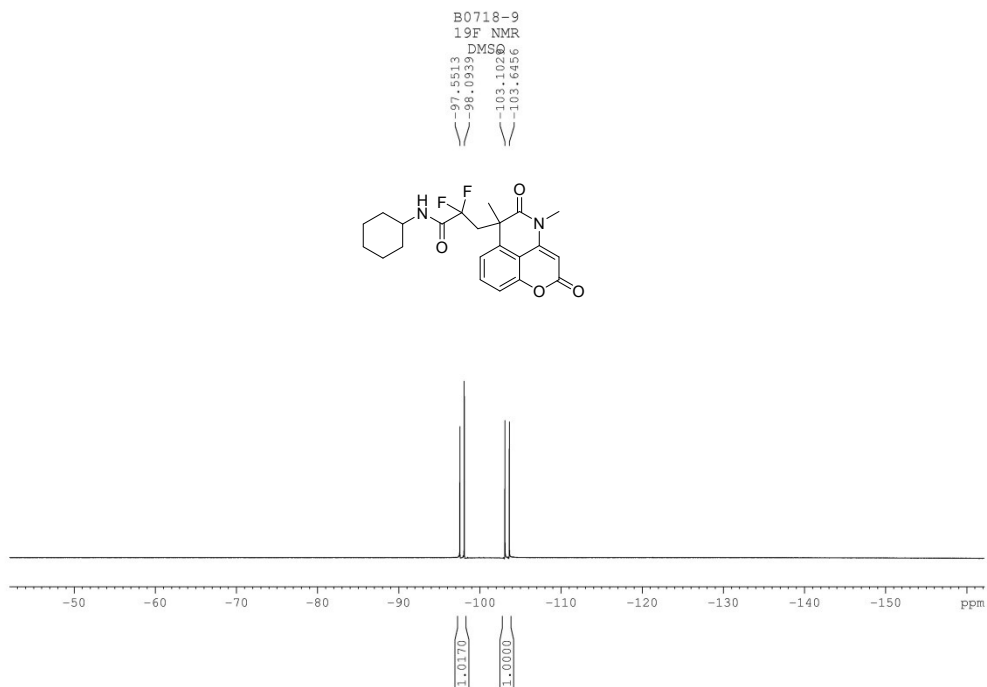

Fig. S93 <sup>19</sup>F NMR (471 MHz) spectrum of compound 4r

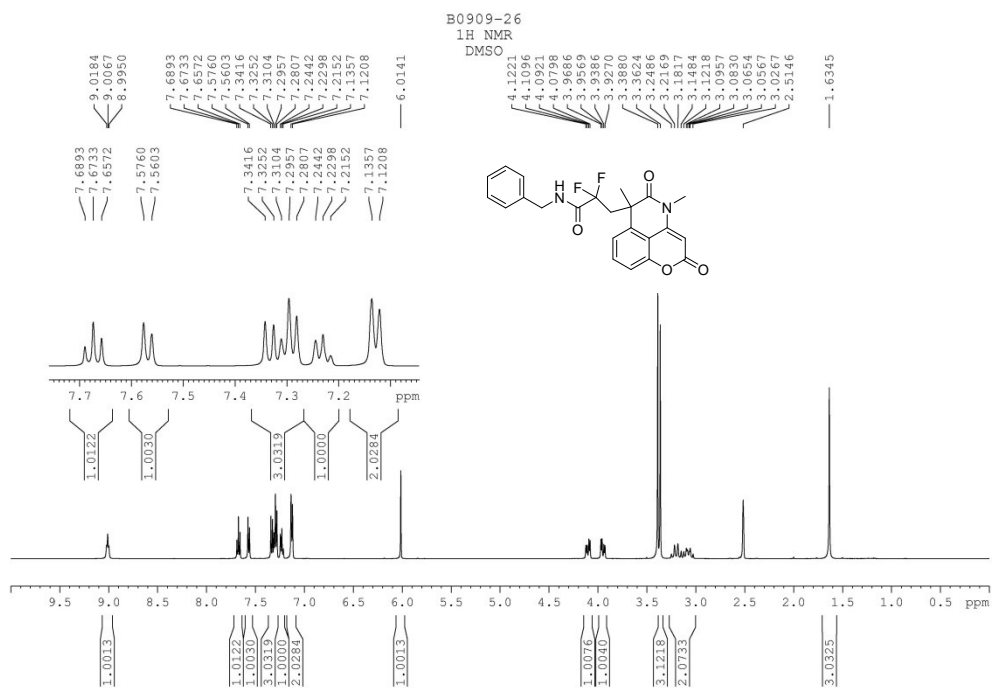

Fig. S94 <sup>1</sup>H NMR (500 MHz) spectrum of compound 4s

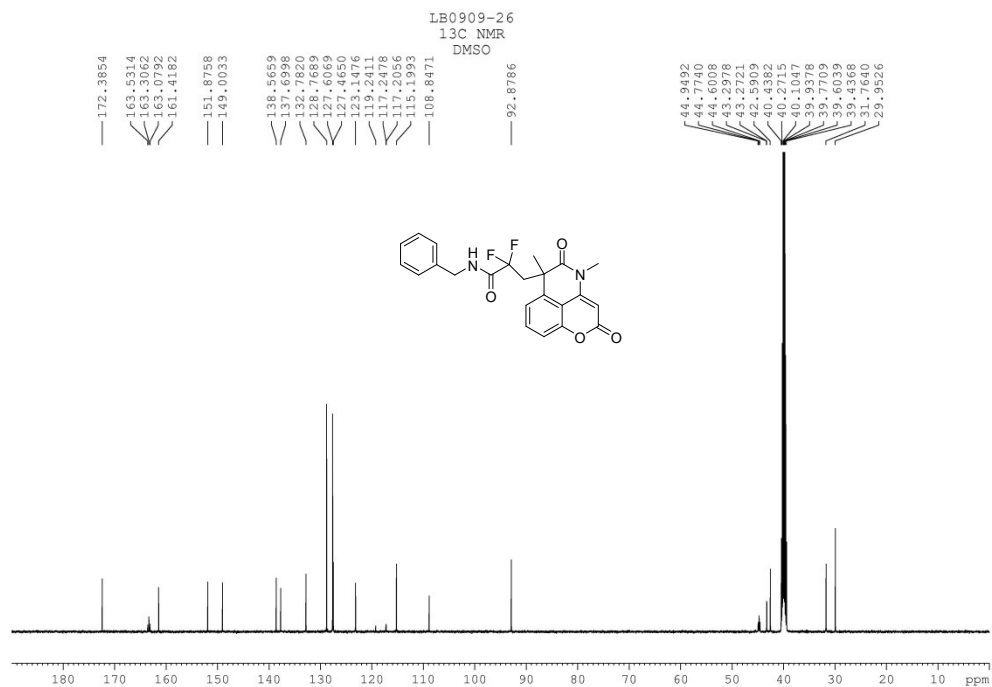

Fig. S95 <sup>13</sup>C NMR (126 MHz) spectrum of compound 4s

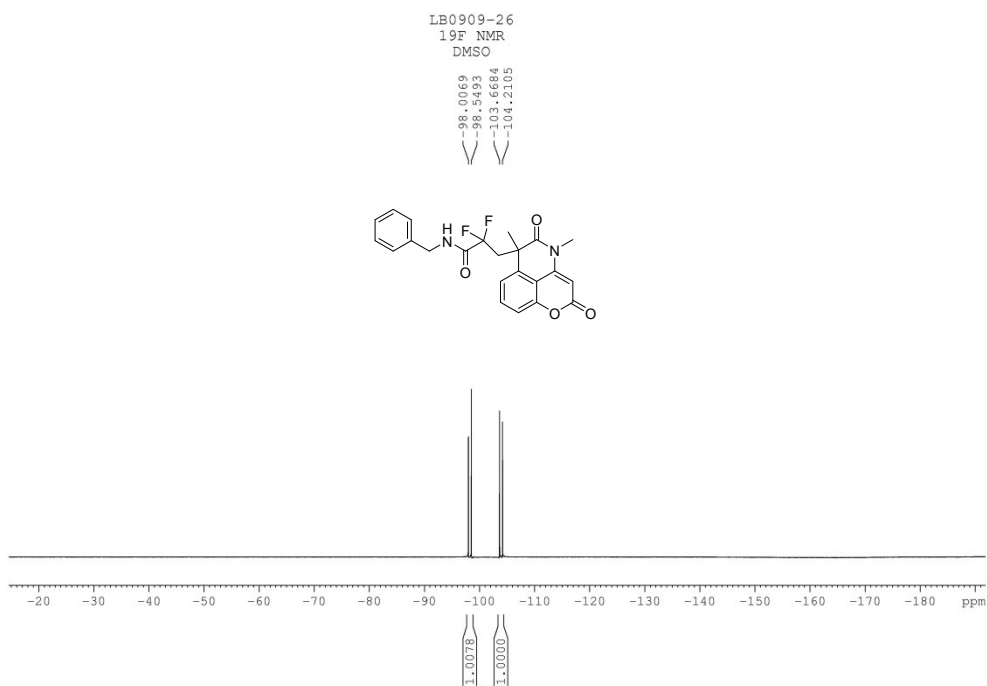

Fig. S96 <sup>19</sup>F NMR (471 MHz) spectrum of compound 4s

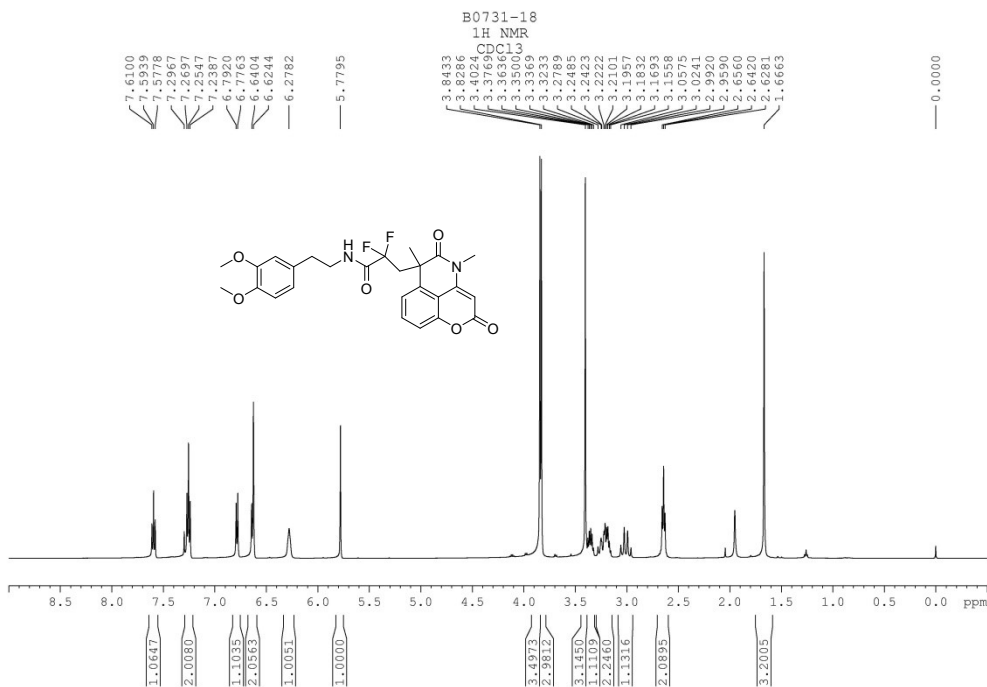

Fig. S97 <sup>1</sup>H NMR (500 MHz) spectrum of compound 4t

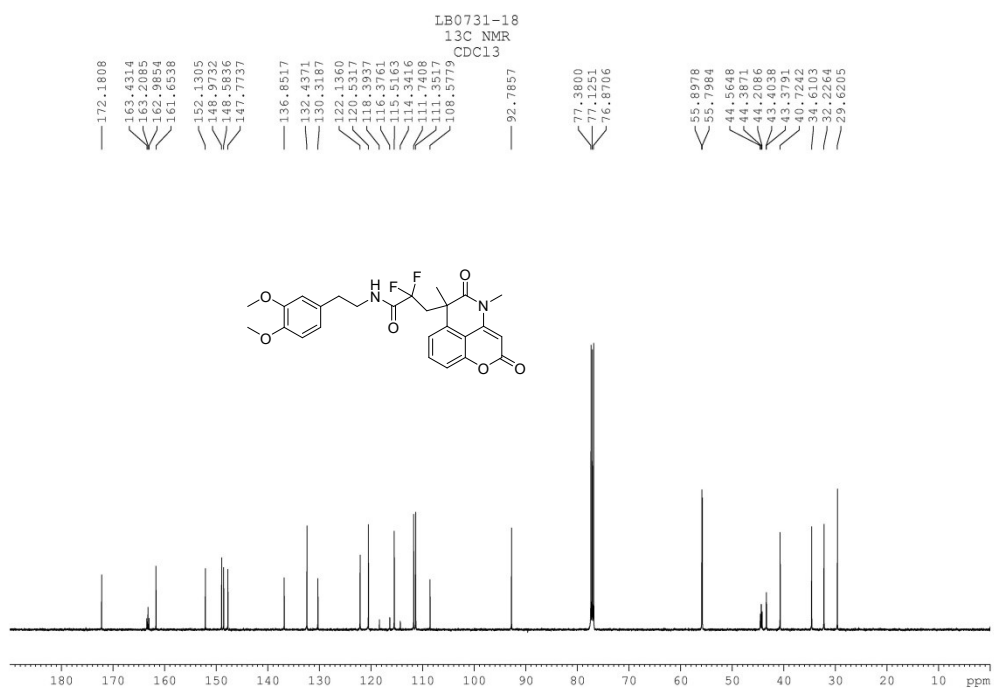

Fig. S98 <sup>13</sup>C NMR (126 MHz) spectrum of compound 4t

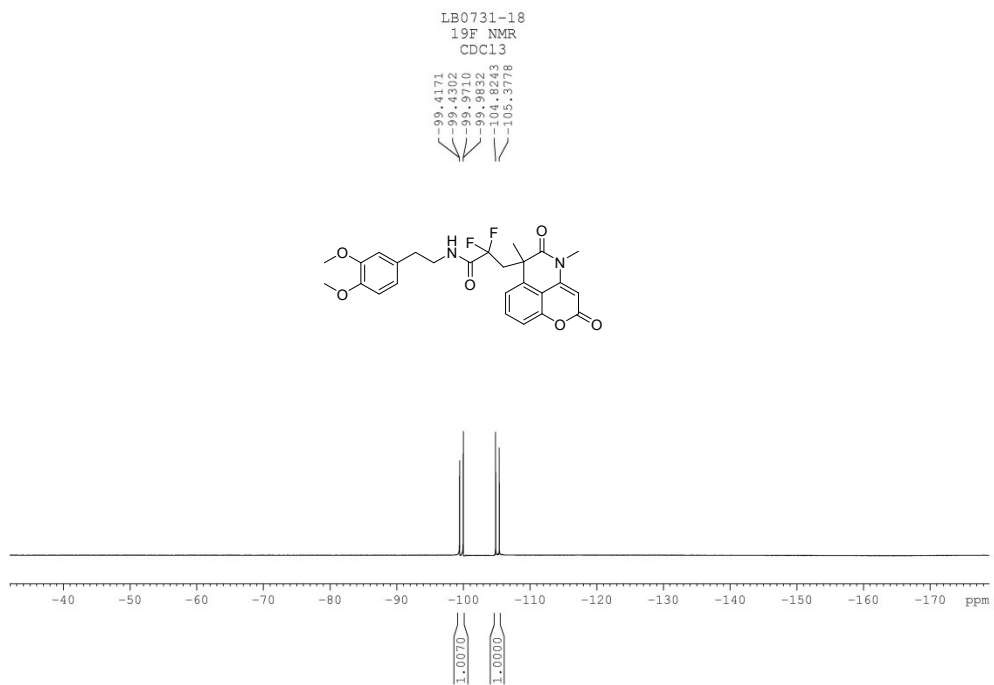

Fig. S99 <sup>19</sup>F NMR (471 MHz) spectrum of compound 4t

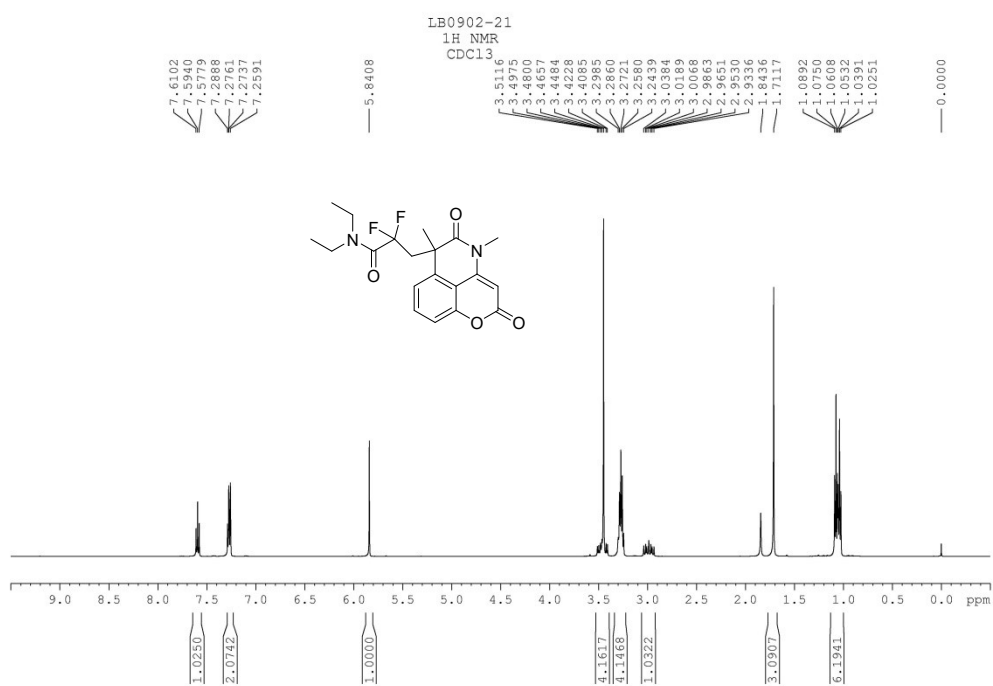

Fig. S100 <sup>1</sup>H NMR (500 MHz) spectrum of compound **4u**

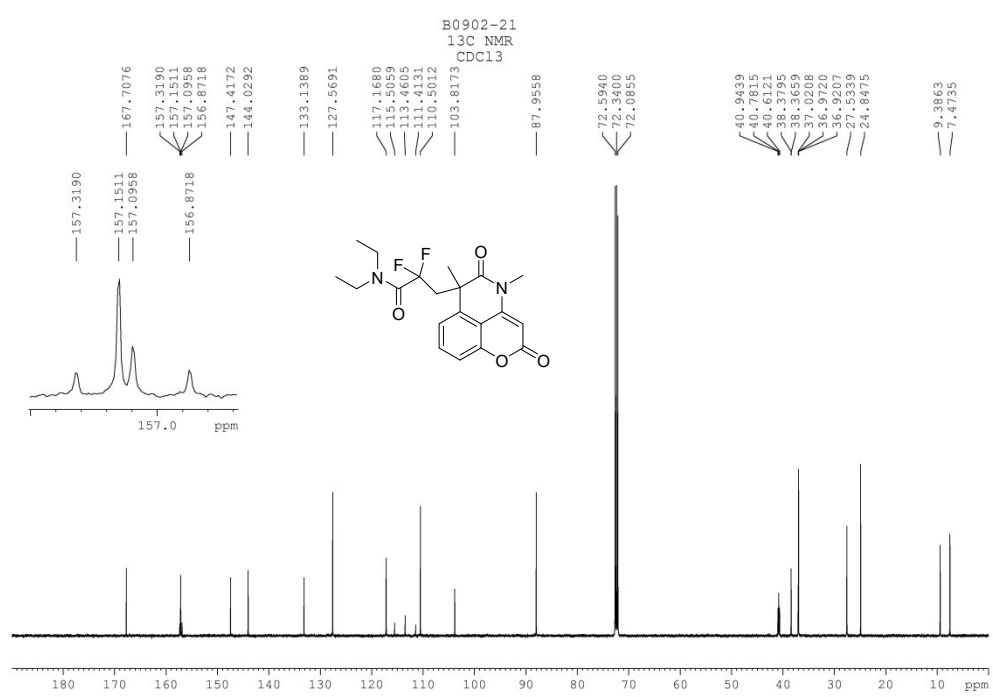

Fig. S101 <sup>13</sup>C NMR (126 MHz) spectrum of compound **4u**

B0902-21  
19F NMR  
CDCl3  
100.9663  
101.5566  
102.8846  
103.4763

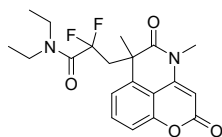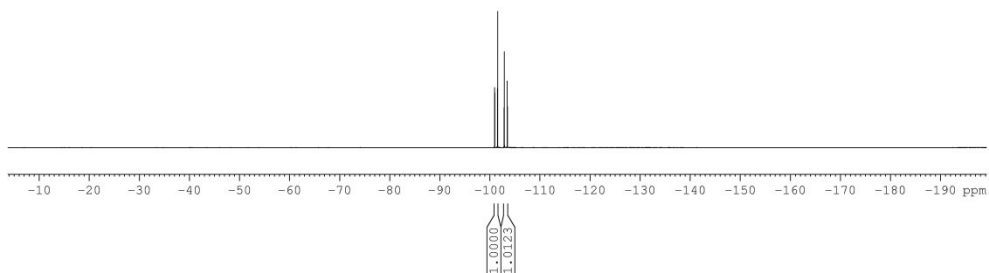

**Fig. S102**  $^{19}\text{F}$  NMR (471 MHz) spectrum of compound **4u**

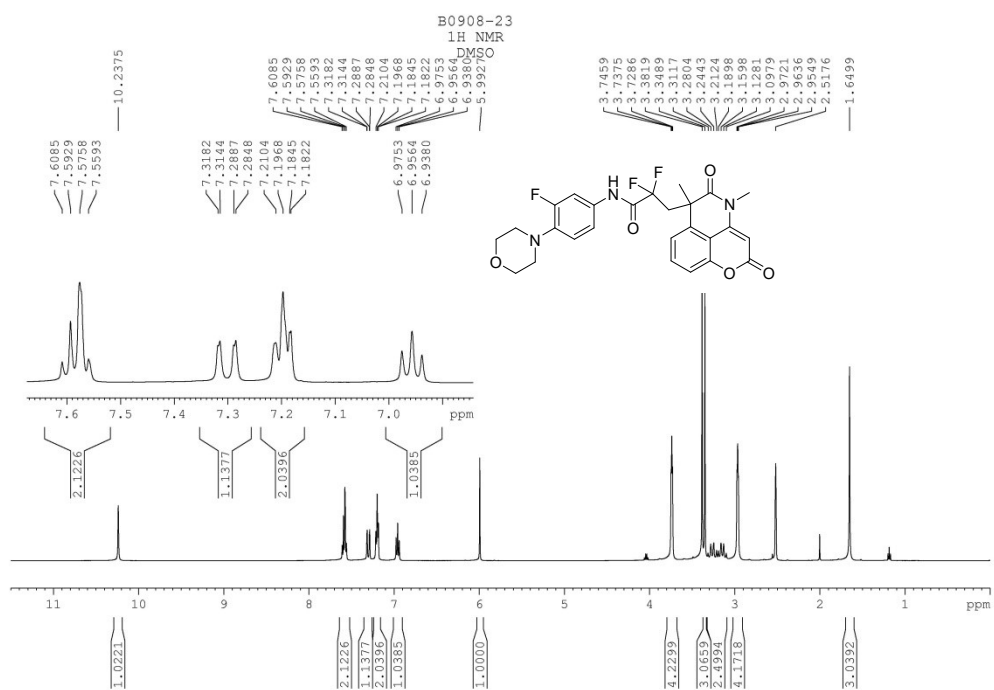

Fig. S103 <sup>1</sup>H NMR (500 MHz) spectrum of compound 8

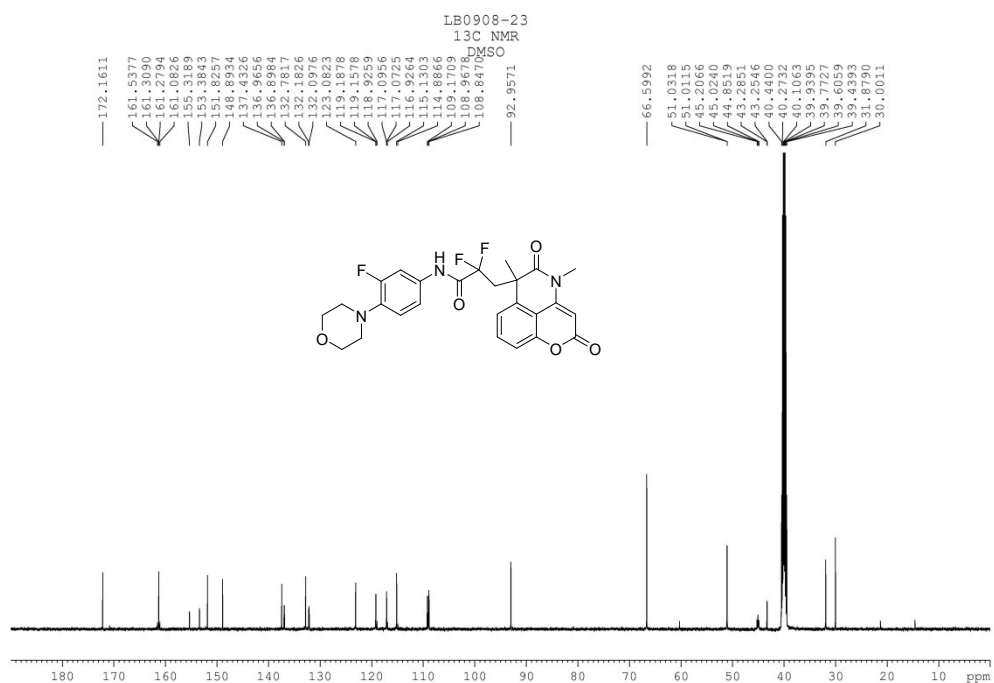

Fig. S104 <sup>13</sup>C NMR (126 MHz) spectrum of compound 8

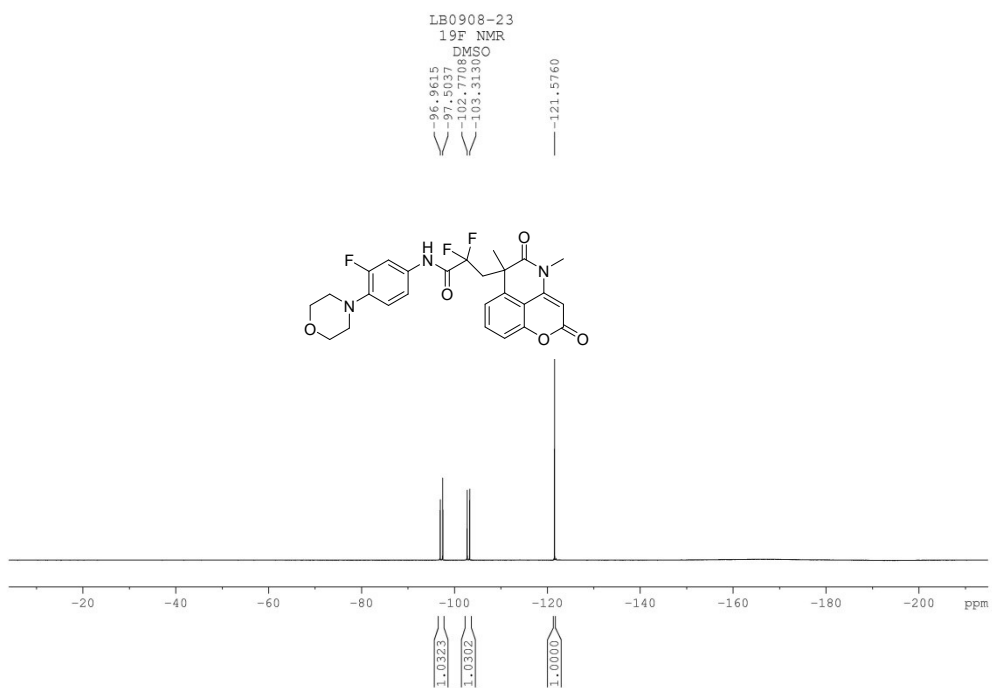

**Fig. S105**  $^{19}\text{F}$  NMR (471 MHz) spectrum of compound **8**
